# Supplementary material for: Palladium-catalyzed double carbonylation of propargyl amines and aryl halides to access 1-aroyl-3-aryl-1,5-dihydro-2H-pyrrol-2-ones
Source: Royal Society of Chemistry journal article supplement (doi:10.1039/d0qo00007h), 2020-01-01

## Supporting Information

### Palladium-catalyzed double carbonylation of propargyl amines and aryl halides to access 1-aryl-3-aryl-1,5-dihydro-2*H*-pyrrol-2-ones

Jun Ying,<sup>a</sup> Zhengjie Le,<sup>a</sup> Zhi-Peng Bao,<sup>a</sup> and Xiao-Feng Wu\*<sup>a,b</sup>

<sup>a</sup> Department of Chemistry, Zhejiang Sci-Tech University, Xiasha Campus, Hangzhou 310018, People's Republic of China. Email: xiao-feng.wu@catalysis.de

<sup>b</sup> Leibniz-Institut für Katalyse e. V. an der Universität Rostock, Albert-Einstein-Straße 29a, 18059 Rostock, Germany.

#### Table of Contents

|                                                                                                                             |            |
|-----------------------------------------------------------------------------------------------------------------------------|------------|
| <b>1. General Information</b> .....                                                                                         | <b>S2</b>  |
| <b>2. Preparation of TFBen</b> .....                                                                                        | <b>S2</b>  |
| <b>3. Procedure for the Synthesis of Propargyl Amines</b> .....                                                             | <b>S2</b>  |
| <b>3.1. General procedure for the synthesis of propargyl amines (1a, 1aa-1am)</b> .....                                     | <b>S2</b>  |
| <b>3.2. General procedure for the synthesis of propargyl amines (1ap and 1aq)</b> .....                                     | <b>S3</b>  |
| <b>3.2.1. General procedure for the synthesis of propargyl alcohols</b> .....                                               | <b>S3</b>  |
| <b>3.2.2. General procedure for the synthesis of phthalimides</b> .....                                                     | <b>S3</b>  |
| <b>3.2.3. General procedure for the cleavage of phthalimides</b> .....                                                      | <b>S4</b>  |
| <b>4. Characterization of TFBen and Substrates</b> .....                                                                    | <b>S4</b>  |
| <b>5. General Procedure for Palladium-Catalyzed Double Carbonylation of Propargyl Amines, Aryl Halides, and TFBen</b> ..... | <b>S10</b> |
| <b>6. Characterization of Products</b> .....                                                                                | <b>S11</b> |
| <b>7. Characterization of Intermediate 2g'</b> .....                                                                        | <b>S28</b> |
| <b>8. References</b> .....                                                                                                  | <b>S28</b> |
| <b>9. Spectra of TFBen and Substrates</b> .....                                                                             | <b>S29</b> |
| <b>10. Spectra of Products</b> .....                                                                                        | <b>S46</b> |
| <b>11. Spectra of Intermediate 2g'</b> .....                                                                                | <b>S80</b> |

## 1. General Information

Unless otherwise noted, all reactions were performed under nitrogen protection unless otherwise noted. All reagents were obtained from commercial sources and used as received without further purification. Column chromatography was performed on silica gel (200–300 mesh) using petroleum ether (bp 60–90 °C) and ethyl acetate as eluent. Reactions were followed with TLC (0.25 mm silica gel 20 cm×20 cm). Visualization was accomplished with UV light. <sup>1</sup>H and <sup>13</sup>C NMR spectra were taken on 400 MHz instruments, and spectral data were reported in ppm relative to tetramethylsilane (TMS) as internal standard and CDCl<sub>3</sub> as solvent.

## 2. Preparation of TFBen

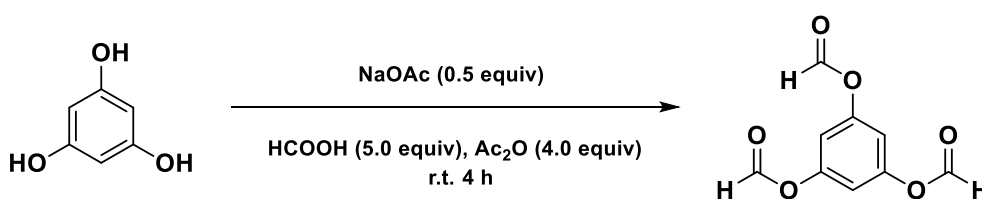

Formic acid (8.4 mL, 222.8 mmol, 5.0 equiv.) was added to acetic anhydride (16.8 mL, 178.2 mmol, 4.0 equiv) at rt. The mixture was stirred at 60 °C for 1 h and cooled to rt. The resulting solution was poured into a flask containing 1,3,5-trihydroxybenzene (5.62 g, 44.6 mmol, 1.0 equiv) and NaOAc (1.83 g, 22.3 mmol, 0.5 equiv). The mixture was stirred for 4 h in a water bath and then diluted with toluene (100 mL), washed with H<sub>2</sub>O (50 mL) twice. Keep the organic phase in fridge (2–8 °C) overnight. Then filtered and dried in vacuo to afford the desired product benzene-1,3,5-triyl triformate (TFBen) (5.1 g, 55%) as a white solid.

## 3. Procedure for the Synthesis of Propargyl Amines

### 3.1 General procedure for the synthesis of propargyl amine (1a, 1aa–1am)<sup>1</sup>

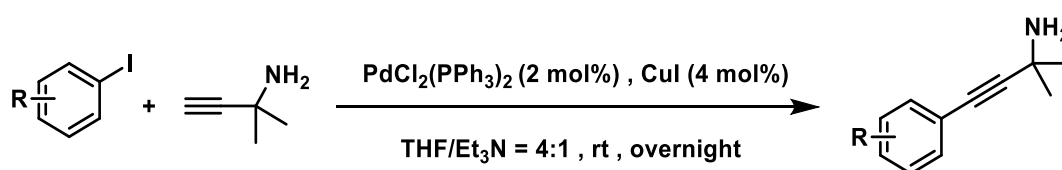

To a solution of CuI (38.1 mg, 0.20 mmol, 4.0 mol %), PdCl<sub>2</sub>(PPh<sub>3</sub>)<sub>2</sub> (70.2 mg,

0.10 mmol, 2 mol %), and an aryl iodide (5.5 mmol, 1.1 equiv) in THF/Et<sub>3</sub>N (4/1, 0.45 M) was added under nitrogen. Then, a propargyl amine (5.0 mmol, 1.0 equiv) was added and the mixture was stirred overnight at rt. A saturated NH<sub>4</sub>Cl aqueous solution was added to the reaction mixture upon completion, then extracted with Et<sub>2</sub>O three times. The combined organic layer was washed with brine and dried over anhydrous Na<sub>2</sub>SO<sub>4</sub>, filtered, and concentrated under reduced pressure. The residue was purified by silica gel column chromatography (PE/EA/Et<sub>3</sub>N=2/1/1%) to obtain the corresponding propargyl amines in high yields.

### 3.2 General procedure for the synthesis of propargyl amines (1ap and 1aq)<sup>2</sup>

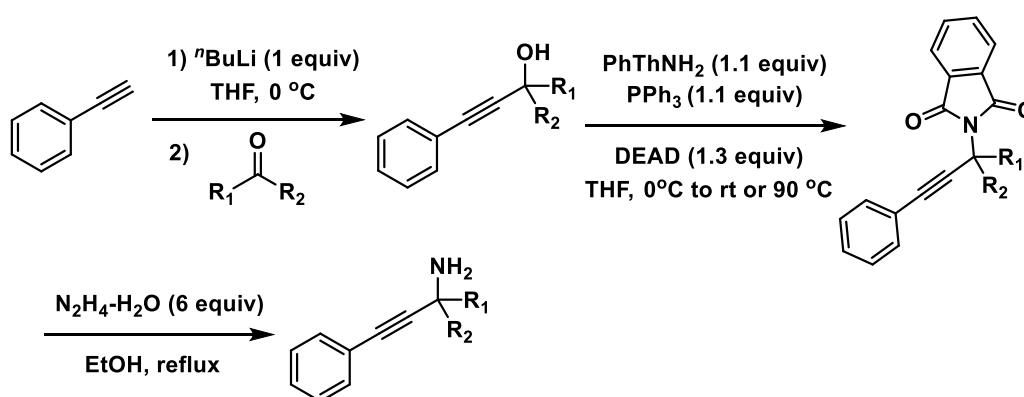

#### 3.2.1 General procedure for the synthesis of propargyl alcohols

To a solution of an alkyne (10 mmol, 1.0 equiv) in THF (28 mL) at 0 °C was added a solution of *n*-butyllithium (2.5 M in THF, 4 mL, 10 mmol, 1.0 equiv) drop-wise. After stirring for 30 min at 0 °C, an aldehyde (12 mmol, 1.2 equiv) was added and the mixture was stirred for an additional 30 min before a saturated aqueous solution of NH<sub>4</sub>Cl (50 mL) was added. The organic layer was then separated and the aqueous phase was extracted twice with EtOAc (2 x 20 mL). The combined organic layers were eventually washed with brine (50 mL), dried over anhydrous Na<sub>2</sub>SO<sub>4</sub>, filtered and concentrated under reduced pressure. The crude residue was purified by flash column chromatography (PE/EA=10/1) over silica gel to afford pure propargyl alcohols.

#### 3.2.2 General procedure for the synthesis of phthalimides

To a solution of a propargyl alcohol (10 mmol, 1.0 equiv) in THF (100 mL) at 0 °C was added triphenylphosphine (2.89 g, 11 mmol, 1.1 equiv), a phthalimide (1.62 g, 11 mmol, 1.1 equiv) and a solution of DEAD (40% wt in toluene, 5.9 mL, 13 mmol,

1.3 equiv). The reaction mixture was then stirred for 20 h at rt before the solvent was evaporated and triphenylphosphine oxide was precipitated by the addition of a 1:1 mixture of Et<sub>2</sub>O/PE (40 mL). The precipitate was filtered through a plug of Celite and the solvent was evaporated under reduced pressure to afford a crude residue which was purified by flash column chromatography (PE/EA=10/1) over silica gel.

### 3.2.3 General procedure for the cleavage of phthalimides

To a solution of a phthalimide (3 mmol, 1 equiv) in EtOH (26 mL) was added hydrazine hydrate (0.9 mL, 18 mmol, 6 equiv) drop-wise and the resulting mixture was stirred at reflux for 3 h. The formed pasty precipitate was then filtered through a plug of Celite, washed with Et<sub>2</sub>O (20 mL) and the solvent was evaporated under reduced pressure. The crude residue was finally purified by flash column chromatography (PE/EA/Et<sub>3</sub>N=2/1/1%) over silica gel to afford the desired pure propargyl amines.

## 4. Characterization of TFBen and Substrates

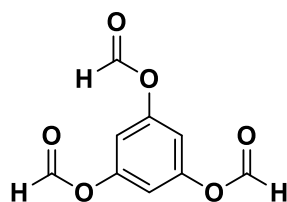

### Benzene-1,3,5-triyl triformate, TFBen<sup>3</sup>

White solid, mp. 53.2-55.6 °C.

<sup>1</sup>H NMR (400 MHz, CDCl<sub>3</sub>): δ = 8.24 (s, 3H), 6.97 (s, 3H).

<sup>13</sup>C NMR (100 MHz, CDCl<sub>3</sub>): δ = 158.06, 150.30, 112.62.

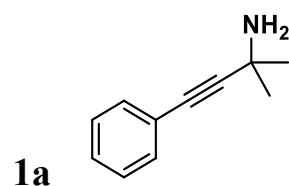

### 2-Methyl-4-phenylbut-3-yn-2-amine<sup>1</sup>

This compound was obtained as a yellow oil in 90% yield.

$^1\text{H NMR}$  (400 MHz,  $\text{CDCl}_3$ ):  $\delta = 7.39 - 7.29$  (m, 2H), 7.21 (dd,  $J = 5.1, 2.0$  Hz, 3H), 1.68 (s, 2H), 1.43 (s, 6H).

$^{13}\text{C NMR}$  (100 MHz,  $\text{CDCl}_3$ ):  $\delta = 131.4, 128.2, 127.7, 123.4, 97.1, 79.9, 45.5, 31.8$ .

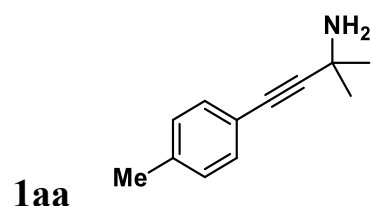

**2-Methyl-4-(*p*-tolyl)but-3-yn-2-amine<sup>1</sup>**

This compound was obtained as a yellow oil in 86% yield.

$^1\text{H NMR}$  (400 MHz,  $\text{CDCl}_3$ ):  $\delta = 7.30$  (d,  $J = 8.1$  Hz, 1H), 7.09 (d,  $J = 7.9$  Hz, 2H), 2.33 (s, 2H), 1.85 (s, 2H), 1.50 (s, 6H).

$^{13}\text{C NMR}$  (100 MHz,  $\text{CDCl}_3$ ):  $\delta = 137.7, 131.4, 128.9, 120.3, 96.2, 80.1, 45.6, 31.8, 21.37$ .

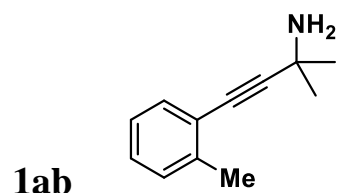

**2-Methyl-4-(*m*-tolyl)but-3-yn-2-amine<sup>1</sup>**

This compound was obtained as a yellow oil in 78% yield.

$^1\text{H NMR}$  (400 MHz,  $\text{CDCl}_3$ ):  $\delta = 7.32 - 7.15$  (m, 3H), 7.09 (d,  $J = 7.3$  Hz, 1H), 2.32 (s, 3H), 1.78 (s, 2H), 1.50 (s, 6H).

$^{13}\text{C NMR}$  (100 MHz,  $\text{CDCl}_3$ ):  $\delta = 137.8, 132.1, 128.7, 128.5, 128.1, 96.7, 80.1, 45.6, 31.8, 21.1$ .

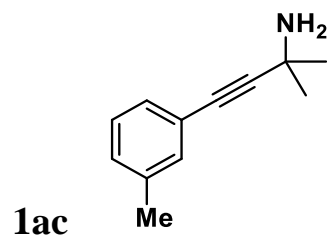

**2-Methyl-4-(*m*-tolyl)but-3-yn-2-amine<sup>1</sup>**

This compound was obtained as a yellow oil in 78% yield.

$^1\text{H NMR}$  (400 MHz,  $\text{CDCl}_3$ ):  $\delta = 7.32 - 7.15$  (m, 3H), 7.09 (d,  $J = 7.3$  Hz, 1H), 2.32 (s, 3H), 1.78 (s, 2H), 1.50 (s, 6H).

$^{13}\text{C NMR}$  (100 MHz,  $\text{CDCl}_3$ ):  $\delta = 137.8, 132.1, 128.7, 128.5, 128.1, 96.7, 80.1, 45.6, 31.8, 21.1$ .

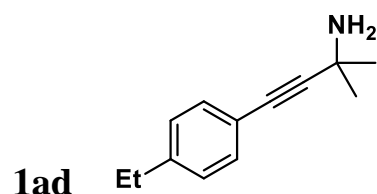

**4-(4-Ethylphenyl)-2-methylbut-3-yn-2-amine<sup>1</sup>**

This compound was obtained as a yellow oil in 90% yield.

$^1\text{H NMR}$  (400 MHz,  $\text{CDCl}_3$ ):  $\delta = 7.32$  (d,  $J = 8.1$  Hz, 2H), 7.10 (d,  $J = 8.0$  Hz, 2H), 2.62 (q,  $J = 7.6$  Hz, 2H), 1.87 (s, 2H), 1.49 (s, 6H), 1.21 (t,  $J = 7.6$  Hz, 3H).

$^{13}\text{C NMR}$  (100 MHz,  $\text{CDCl}_3$ ):  $\delta = 144.1, 131.5, 127.7, 120.6, 96.3, 80.1, 45.6, 31.8, 28.7, 15.3$ .

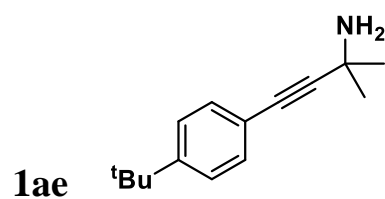

**(4-(tert-Butyl)phenyl)-2-methylbut-3-yn-2-amine<sup>1</sup>**

This compound was obtained as a yellow oil in 91% yield.

$^1\text{H NMR}$  (400 MHz,  $\text{CDCl}_3$ ):  $\delta = 7.39 - 7.30$  (m, 4H), 1.80 (s, 2H), 1.52 (s, 6H), 1.33 (s, 9H).

$^{13}\text{C NMR}$  (100 MHz,  $\text{CDCl}_3$ ):  $\delta = 150.9, 131.2, 125.2, 120.4, 96.4, 80.0, 45.6, 34.7, 31.9, 31.2$ .

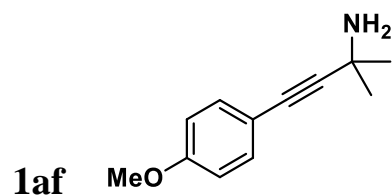

#### 4-(4-Methoxyphenyl)-2-methylbut-3-yn-2-amine<sup>1</sup>

This compound was obtained as a yellow oil in 94% yield.

<sup>1</sup>H NMR (400 MHz, CDCl<sub>3</sub>):  $\delta$  = 7.36 (d, *J* = 7.0 Hz, 2H), 6.86 (d, *J* = 7.1 Hz, 2H), 3.84 (s, 3H), 1.88 (s, 2H), 1.53 (s, 6H).

<sup>13</sup>C NMR (100 MHz, CDCl<sub>3</sub>):  $\delta$  = 159.3, 132.9, 115.5, 113.8, 95.5, 79.8, 55.2, 45.7, 31.9.

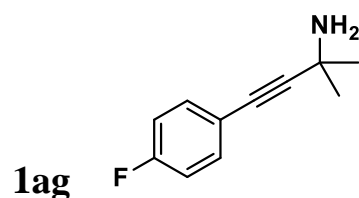

#### 4-(4-Fluorophenyl)-2-methylbut-3-yn-2-amine<sup>1</sup>

This compound was obtained as a yellow oil in 73% yield.

<sup>1</sup>H NMR (400 MHz, CDCl<sub>3</sub>):  $\delta$  = 7.38 – 7.23 (m, 2H), 6.94 (t, *J* = 8.7 Hz, 2H), 1.71 (s, 2H), 1.45 (s, 6H).

<sup>13</sup>C NMR (100 MHz, CDCl<sub>3</sub>):  $\delta$  = 162.2 (d, *J* = 246.2 Hz), 133.3 (d, *J* = 8.2 Hz), 119.4, 115.3 (d, *J* = 22.0 Hz), 96.6, 78.9, 45.6, 31.8.

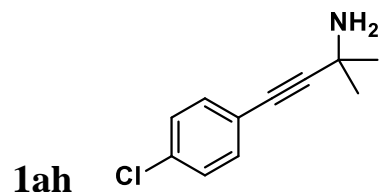

#### 4-(4-Chlorophenyl)-2-methylbut-3-yn-2-amine<sup>1</sup>

This compound was obtained as a yellow oil in 75% yield.

<sup>1</sup>H NMR (400 MHz, CDCl<sub>3</sub>):  $\delta$  = 7.31 – 7.28 (m, 2H), 7.24 (d, *J* = 8.4 Hz, 2H), 1.80 (s, 2H), 1.47 (s, 6H).

<sup>13</sup>C NMR (100 MHz, CDCl<sub>3</sub>):  $\delta$  = 133.7, 133.0, 132.7, 128.5, 121.9, 97.9, 78.9, 45.6, 31.7.

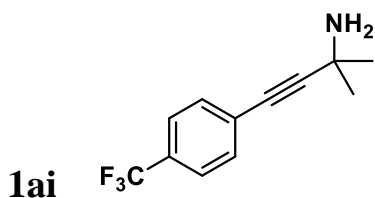

**2-Methyl-4-(4-(trifluoromethyl)phenyl)but-3-yn-2-amine<sup>1</sup>**

This compound was obtained as a yellow oil in 80% yield.

<sup>1</sup>H NMR (400 MHz, CDCl<sub>3</sub>): δ = 7.54 (d, *J* = 8.2 Hz, 2H), 7.48 (d, *J* = 8.4 Hz, 2H), 1.80 (s, 2H), 1.51 (s, 6H).

<sup>13</sup>C NMR (100 MHz, CDCl<sub>3</sub>): δ = 131.7, 129.6 (q, *J* = 32.5 Hz), 127.3, 125.1 (q, *J* = 3.8 Hz), 123.9 (q, *J* = 272.2 Hz), 99.5, 78.9, 45.7, 31.6.

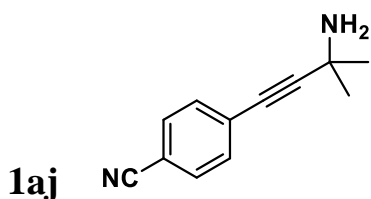

**4-(3-Amino-3-methylbut-1-yn-1-yl)benzonitrile<sup>1</sup>**

This compound was obtained as a yellow oil in 82% yield.

<sup>1</sup>H NMR (400 MHz, CDCl<sub>3</sub>): δ = 7.60 (d, *J* = 8.4 Hz, 2H), 7.48 (d, *J* = 8.4 Hz, 2H), 1.82 (s, 2H), 1.52 (s, 6H).

<sup>13</sup>C NMR (100 MHz, CDCl<sub>3</sub>): δ = 132.0, 131.9, 128.4, 118.5, 111.2, 101.6, 78.8, 45.8, 31.6.

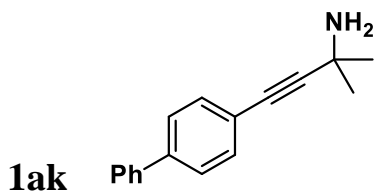

**4-([1,1'-Biphenyl]-4-yl)-2-methylbut-3-yn-2-amine<sup>1</sup>**

This compound was obtained as a yellow oil in 90% yield.

<sup>1</sup>H NMR (400 MHz, CDCl<sub>3</sub>): δ = 7.64 – 7.43 (m, 8H), 7.39 (d, *J* = 7.4 Hz, 1H), 1.81 (s, 2H), 1.57 (s, 6H).

<sup>13</sup>C NMR (100 MHz, CDCl<sub>3</sub>): δ = 140.5, 140.4, 132.0, 128.9, 127.6, 127.0, 126.9, 97.8, 79.9, 45.7, 31.9.



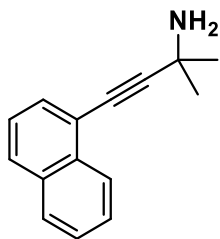

**1al**

**2-Methyl-4-(naphthalen-1-yl)but-3-yn-2-amine<sup>1</sup>**

**This compound was obtained as a yellow oil in 87% yield.**

<sup>1</sup>H NMR (400 MHz, CDCl<sub>3</sub>): δ = 8.36 (d, *J* = 8.3 Hz, 1H), 7.85 (dd, *J* = 19.0, 8.1 Hz, 2H), 7.71 – 7.52 (m, 3H), 7.49 – 7.40 (m, 1H), 1.96 (s, 2H), 1.66 (s, 6H).

<sup>13</sup>C NMR (100 MHz, CDCl<sub>3</sub>): δ = 133.3, 133.2, 130.1, 128.3, 128.2, 126.7, 126.3, 126.1, 125.2, 121.0, 102.2, 78.2, 46.0, 32.0.

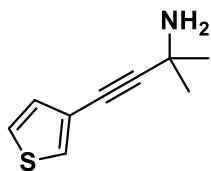

**1am**

**2-Methyl-4-(thiophen-3-yl)but-3-yn-2-amine<sup>1</sup>**

**This compound was obtained as a yellow oil in 75% yield.**

<sup>1</sup>H NMR (400 MHz, CDCl<sub>3</sub>): δ = 7.33 (dd, *J* = 2.9, 1.1 Hz, 1H), 7.19 (dd, *J* = 4.9, 3.0 Hz, 1H), 7.04 (dd, *J* = 5.0, 1.0 Hz, 1H), 1.77 (s, 2H), 1.44 (s, 6H).

<sup>13</sup>C NMR (100 MHz, CDCl<sub>3</sub>): δ = 129.9, 127.9, 125.1, 122.3, 96.6, 75.1, 45.6, 31.8.

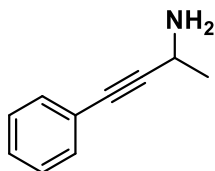

**1ap**

**4-Phenylbut-3-yn-2-amine<sup>1</sup>**

**This compound was obtained as a yellow oil in 30% yield.**

<sup>1</sup>H NMR (400 MHz, CDCl<sub>3</sub>): δ = 7.44 (dd, *J* = 6.4, 3.0 Hz, 2H), 7.32 (dd, *J* = 6.8, 3.9 Hz, 3H), 3.96 (dd, *J* = 13.3, 6.6 Hz, 1H), 1.67 (s, 2H), 1.48 (d, *J* = 6.7 Hz, 3H).

<sup>13</sup>C NMR (100 MHz, CDCl<sub>3</sub>): δ = 131.5, 128.2, 127.9, 123.3, 94.0, 81.5, 39.4, 24.6.

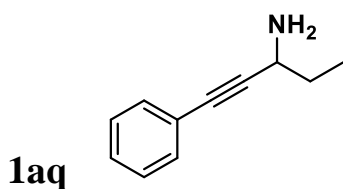

**1-Phenylpent-1-yn-3-amine<sup>1</sup>**

This compound was obtained as a yellow oil in 35% yield.

<sup>1</sup>H NMR (400 MHz, CDCl<sub>3</sub>): δ = 7.50 – 7.38 (m, 2H), 7.31 (dd, *J* = 4.5, 2.0 Hz, 3H), 3.75 (t, *J* = 6.7 Hz, 1H), 1.68 (s, 2H), 1.11 (t, *J* = 7.4 Hz, 3H).

<sup>13</sup>C NMR (100 MHz, CDCl<sub>3</sub>): δ = 131.6, 128.2, 127.9, 123.4, 92.8, 82.6, 45.5, 31.3, 10.4.

**5. General Procedure for Palladium-Catalyzed Double Carbonylation of Propargyl Amines, Aryl Halides, and TFBen**

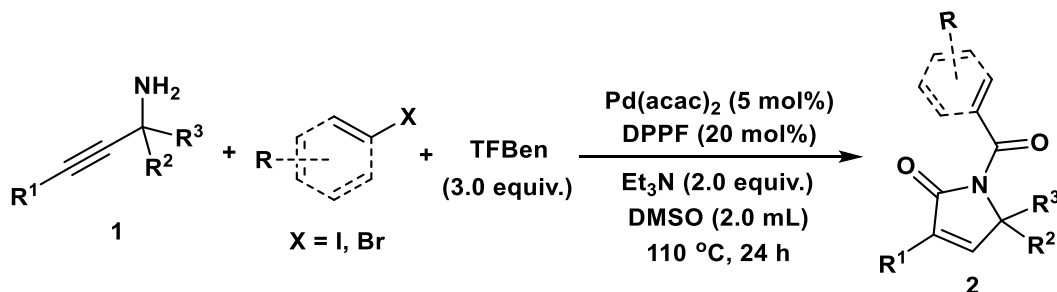

To a solution of propargyl amine **1** (0.5 mmol, 1.0 equiv), Pd(acac)<sub>2</sub> (7.6 mg, 5 mol %), DPPF (55.4 mg, 20 mol %), and a 2.5 mL vial containing TFBen (315 mg, 1.5 mmol, 3.0 equiv) were added to an oven-dried tube (15 mL) which was then placed under vacuum and refilled with nitrogen three times. Et<sub>3</sub>N (140 μL, 1.0 mmol, 2.0 equiv), an aryl halide (0.6 mmol, 1.2 equiv) and DMSO (2.0 mL) were added into the tube via syringe. The tube was sealed and stirred at 110 °C for 24 h. Upon the reaction was completed, the resulting mixture was filtered through a pad of tripolite and washed with EtOAc. The filtrate was concentrated under vacuum and purified by silica gel column using chromatography (petroleum ether / acetone) to obtain the desired products **2**.

## 6. Characterization of Products

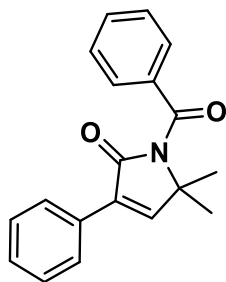

**2a**

### 1-Benzoyl-5,5-dimethyl-3-phenyl-1,5-dihydro-2H-pyrrol-2-one

According to general procedure for reaction, the crude residue was purified by flash chromatography (petroleum ether / acetone = 10:1) to give the product as a **white solid (116.4 mg, 80%). mp. 126-128 °C**

**<sup>1</sup>H NMR (400 MHz, CDCl<sub>3</sub>):**  $\delta$  = 7.89 – 7.86 (m, 2H), 7.64 – 7.55 (m, 3H), 7.52 – 7.43 (m, 5H), 7.43 (s, 1H), 1.83 (s, 6H).

**<sup>13</sup>C NMR (100 MHz, CDCl<sub>3</sub>):**  $\delta$  = 170.1, 168.5, 152.6, 136.3, 132.4, 131.3, 130.3, 129.1, 128.6, 128.0, 127.9, 127.3, 63.6, 24.6.

**HRMS (ESI):** [M+H<sup>+</sup>]calcd for C<sub>19</sub>H<sub>18</sub>NO<sub>2</sub><sup>+</sup>, 292.1332; found, 292.1352.

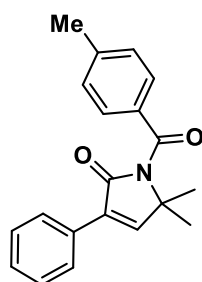

**2b**

### 5,5-Dimethyl-1-(4-methylbenzoyl)-3-phenyl-1,5-dihydro-2H-pyrrol-2-one

According to general procedure for reaction, the crude residue was purified by flash chromatography (petroleum ether / acetone = 10:1) to give the product as a **white solid (131.1 mg, 86%). mp. 127-129 °C**

**<sup>1</sup>H NMR (400 MHz, CDCl<sub>3</sub>):**  $\delta$  = 7.87 (dt,  $J$  = 4.4, 2.6 Hz, 2H), 7.53 (d,  $J$  = 8.1 Hz, 2H), 7.47 – 7.42 (m, 3H), 7.41 (s, 1H), 7.29 (d,  $J$  = 8.2 Hz, 2H), 2.46 (s, 3H), 1.82 (s, 6H).

**<sup>13</sup>C NMR (100 MHz, CDCl<sub>3</sub>):**  $\delta$  = 170.2, 168.5, 152.4, 141.8, 133.4, 132.4, 130.3, 129.0, 128.7, 128.5, 128.2, 127.3, 63.6, 24.6, 21.7.

**HRMS (ESI):** [M+Na<sup>+</sup>]calcd for C<sub>20</sub>H<sub>19</sub>NNaO<sub>2</sub><sup>+</sup>, 328.1308; found, 328.1325.

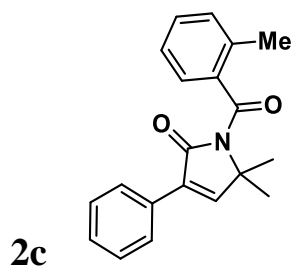

**5,5-Dimethyl-1-(2-methylbenzoyl)-3-phenyl-1,5-dihydro-2H-pyrrol-2-one**

According to general procedure for reaction, the crude residue was purified by flash chromatography (petroleum ether / acetone = 10:1) to give the product as a **yellow oil (91.5 mg, 60%)**.

**<sup>1</sup>H NMR (400 MHz, CDCl<sub>3</sub>):**  $\delta$  = 7.84 (dt,  $J$  = 5.1, 3.2 Hz, 2H), 7.44 (s, 1H), 7.43 – 7.40 (m, 4H), 7.36 – 7.28 (m, 3H), 2.41 (s, 3H), 1.87 (s, 6H).

**<sup>13</sup>C NMR (100 MHz, CDCl<sub>3</sub>):**  $\delta$  = 169.8, 167.9, 153.0, 137.5, 133.9, 132.3, 130.2, 130.1, 129.4, 129.1, 128.5, 127.3, 125.8, 125.6, 63.3, 24.2, 19.1.

**HRMS (ESI):** [M+H<sup>+</sup>]calcd for C<sub>20</sub>H<sub>20</sub>NO<sub>2</sub><sup>+</sup>, 306.1489; found, 306.1509.

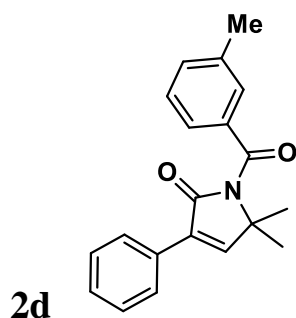

**5,5-Dimethyl-1-(3-methylbenzoyl)-3-phenyl-1,5-dihydro-2H-pyrrol-2-one**

According to general procedure for reaction, the crude residue was purified by flash chromatography (petroleum ether / acetone = 10:1) to give the product as a **white solid (96.1 mg, 63%). mp. 116-118 °C**

**<sup>1</sup>H NMR (400 MHz, CDCl<sub>3</sub>):**  $\delta$  = 7.89 – 7.85 (m, 2H), 7.57 – 7.40 (m, 6H), 7.38 (s, 1H), 7.37 (s, 1H), 2.46 (s, 3H), 1.82 (s, 6H).

**<sup>13</sup>C NMR (100 MHz, CDCl<sub>3</sub>):**  $\delta$  = 170.3, 168.4, 152.6, 137.8, 136.4, 132.4, 132.0, 130.3, 129.1, 128.6, 128.3, 127.8, 127.3, 63.5, 24.6, 21.4.

**HRMS (ESI):** [M+H<sup>+</sup>]calcd for C<sub>20</sub>H<sub>20</sub>NO<sub>2</sub><sup>+</sup>, 306.1489; found, 306.1505.

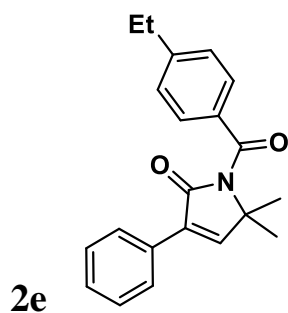

**1-(4-Ethylbenzoyl)-5,5-dimethyl-3-phenyl-1,5-dihydro-2H-pyrrol-2-one**

According to general procedure for reaction, the crude residue was purified by flash chromatography (petroleum ether / acetone = 10:1) to give the product as a **white solid** (127.6 mg, 80%). mp. 141-143 °C

<sup>1</sup>H NMR (400 MHz, CDCl<sub>3</sub>): δ = 7.87 – 7.83 (m, 2H), 7.53 (d, *J* = 8.1 Hz, 2H), 7.45 – 7.40 (m, 3H), 7.39 (s, 1H), 7.30 (d, *J* = 8.2 Hz, 2H), 2.75 (q, *J* = 7.6 Hz, 2H), 1.80 (s, 6H), 1.31 (t, *J* = 7.6 Hz, 3H).

<sup>13</sup>C NMR (100 MHz, CDCl<sub>3</sub>): δ = 170.1, 168.5, 152.4, 148.0, 133.5, 132.5, 130.3, 129.0, 128.5, 128.3, 127.5, 127.2, 63.6, 28.9, 24.6, 15.1.

HRMS (ESI): [M+H<sup>+</sup>]calcd for C<sub>21</sub>H<sub>22</sub>NO<sub>2</sub><sup>+</sup>, 320.1645; found, 320.1662.

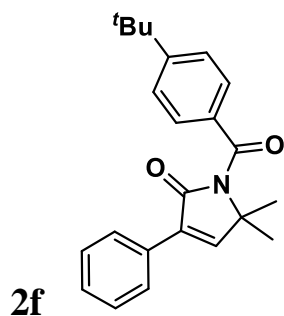

**1-(4-(*tert*-Butyl)benzoyl)-5,5-dimethyl-3-phenyl-1,5-dihydro-2H-pyrrol-2-one**

According to general procedure for reaction, the crude residue was purified by flash chromatography (petroleum ether / acetone = 10:1) to give the product as a **white solid** (135.3 mg, 78%). mp. 188-190 °C

<sup>1</sup>H NMR (400 MHz, CDCl<sub>3</sub>): δ = 7.88 – 7.84 (m, 2H), 7.59 – 7.57 (m, 2H), 7.51 – 7.42 (m, 5H), 7.40 (s, 1H), 1.81 (s, 6H), 1.39 (s, 9H).

<sup>13</sup>C NMR (100 MHz, CDCl<sub>3</sub>): δ = 170.1, 168.5, 154.8, 152.5, 133.2, 132.6, 130.4, 129.0, 128.6, 128.3, 127.3, 124.9, 63.6, 35.0, 31.2, 24.7.

HRMS (ESI): [M+H<sup>+</sup>]calcd for C<sub>23</sub>H<sub>26</sub>NO<sub>2</sub><sup>+</sup>, 348.1958; found, 348.1971.

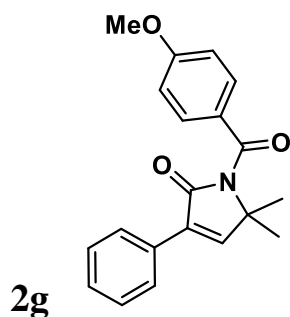

**1-(4-Methoxybenzoyl)-5,5-dimethyl-3-phenyl-1,5-dihydro-2H-pyrrol-2-one**

According to general procedure for reaction, the crude residue was purified by flash chromatography (petroleum ether / acetone = 10:1) to give the product as a **white solid (130.0 mg, 81%)**. mp. **130-132 °C**

**<sup>1</sup>H NMR (400 MHz, CDCl<sub>3</sub>):** δ = 7.87 (dd, *J* = 7.9, 1.7 Hz, 2H), 7.63 – 7.60 (m, 2H), 7.46 – 7.40 (m, 3H), 7.39 (s, 1H), 6.98 – 6.95 (m, 2H), 3.89 (s, 3H), 1.80 (s, 6H).

**<sup>13</sup>C NMR (100 MHz, CDCl<sub>3</sub>):** δ = 169.6, 168.6, 162.4, 152.4, 132.5, 130.7, 130.4, 129.0, 128.5, 128.2, 127.2, 113.3, 63.7, 55.4, 24.8.

**HRMS (ESI):** [M+H<sup>+</sup>]calcd for C<sub>20</sub>H<sub>20</sub>NO<sub>3</sub><sup>+</sup>, 322.1438; found, 322.1453.

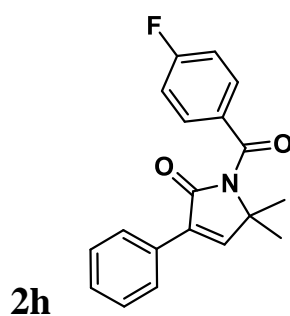

**1-(4-Fluorobenzoyl)-5,5-dimethyl-3-phenyl-1,5-dihydro-2H-pyrrol-2-one**

According to general procedure for reaction, the crude residue was purified by flash chromatography (petroleum ether / acetone = 5:1) to give the product as a **white solid (115.8 mg, 75%)**. mp. **131-133 °C**

**<sup>1</sup>H NMR (400 MHz, CDCl<sub>3</sub>):** δ = 7.87 – 7.83 (m, 2H), 7.65 – 7.60 (m, 2H), 7.48 – 7.43 (m, 3H), 7.42 (s, 1H), 7.18 – 7.12 (m, 2H), 1.81 (s, 6H).

**<sup>13</sup>C NMR (100 MHz, CDCl<sub>3</sub>):** δ = 168.9, 168.5, 164.6 (d, *J* = 251.8 Hz), 152.7 (d, *J* = 3.1 Hz), 132.4, 132.3 (d, *J* = 3.3 Hz), 130.6 (d, *J* = 8.9 Hz), 130.2, 129.3, 128.7, 127.2, 115.1 (d, *J* = 22.0 Hz), 63.7, 24.6.

**HRMS (ESI):** [M+H<sup>+</sup>]calcd for C<sub>19</sub>H<sub>17</sub>FNO<sub>2</sub><sup>+</sup>, 310.1238; found, 310.1256.

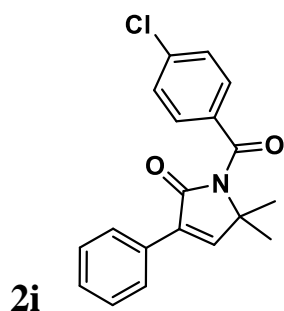

**1-(4-Chlorobenzoyl)-5,5-dimethyl-3-phenyl-1,5-dihydro-2H-pyrrol-2-one**

According to general procedure for reaction, the crude residue was purified by flash chromatography (petroleum ether / acetone = 5:1) to give the product as a **white solid** (131.6 mg, 81%). mp. 135-137 °C

<sup>1</sup>H NMR (400 MHz, CDCl<sub>3</sub>): δ = 7.85 – 7.81 (m, 2H), 7.55 – 7.51 (m, 2H), 7.45 (s, 1H), 7.44 – 7.41 (m, 5H), 1.80 (s, 6H).

<sup>13</sup>C NMR (100 MHz, CDCl<sub>3</sub>): δ = 168.9, 168.5, 152.7, 137.4, 134.6, 132.4, 130.1, 129.4, 129.2, 128.6, 128.3, 127.2, 63.7, 24.5.

HRMS (ESI): [M+H<sup>+</sup>]calcd for C<sub>19</sub>H<sub>17</sub>ClNO<sub>2</sub><sup>+</sup>, 326.0942; found, 326.0958.

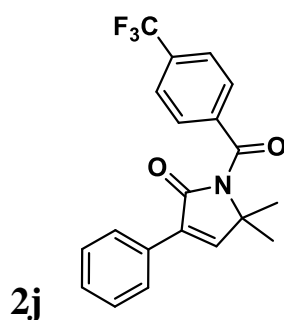

**5,5-Dimethyl-3-phenyl-1-(4-(trifluoromethyl)benzoyl)-1,5-dihydro-2H-pyrrol-2-one**

According to general procedure for reaction, the crude residue was purified by flash chromatography (petroleum ether / acetone = 5:1) to give the product as a **white solid** (149.0 mg, 83%). mp. 168-170 °C

<sup>1</sup>H NMR (400 MHz, CDCl<sub>3</sub>): δ = 7.84 – 7.80 (m, 2H), 7.74 (d, *J* = 8.3 Hz, 2H), 7.67 (d, *J* = 8.2 Hz, 2H), 7.44 (s, 1H), 7.47 – 7.41 (m, 3H), 1.83 (s, 6H).

<sup>13</sup>C NMR (100 MHz, CDCl<sub>3</sub>): δ = 168.6, 168.4, 153.0, 139.8, 132.4, 132.5 (q, *J* = 32.7 Hz), 129.9, 129.3, 128.6, 128.0, 127.2, 125.1 (q, *J* = 3.9 Hz), 123.8 (q, *J* = 272.5 Hz), 63.7, 24.4.

HRMS (ESI): [M+H<sup>+</sup>]calcd for C<sub>20</sub>H<sub>17</sub>F<sub>3</sub>NO<sub>2</sub><sup>+</sup>, 360.1206; found, 360.1221.

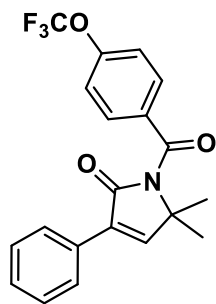

**2k**

**5,5-Dimethyl-3-phenyl-1-(4-(trifluoromethoxy)benzoyl)-1,5-dihydro-2H-pyrrol-2-one**

According to general procedure for reaction, the crude residue was purified by flash chromatography (petroleum ether / acetone = 5:1) to give the product as a **white solid** (133.1 mg, 71%). mp. 124-126 °C

<sup>1</sup>H NMR (400 MHz, CDCl<sub>3</sub>): δ = 7.83 – 7.79 (m, 2H), 7.64 – 7.61 (m, 2H), 7.46 – 7.42 (m, 3H), 7.41 (s, 1H), 7.29 (d, *J* = 7.7 Hz, 2H), 1.80 (s, 6H).

<sup>13</sup>C NMR (100 MHz, CDCl<sub>3</sub>): δ = 168.6, 168.4, 152.8, 151.2, 134.5, 132.4, 130.1, 129.9, 129.2, 128.6, 127.2, 120.6, 120.4 (q, *J* = 258.3 Hz), 63.7, 24.5.

HRMS (ESI): [M+H<sup>+</sup>]calcd for C<sub>20</sub>H<sub>17</sub>F<sub>3</sub>NO<sub>3</sub><sup>+</sup>, 376.1155; found, 376.1165.

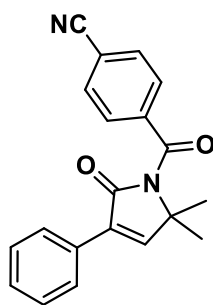

**2l**

**4-(2,2-Dimethyl-5-oxo-4-phenyl-2,5-dihydro-1H-pyrrole-1-carbonyl)benzotrile**

According to general procedure for reaction, the crude residue was purified by flash chromatography (petroleum ether / acetone = 5:1) to give the product as a **white solid** (118.5 mg, 75%). mp. 158-160 °C

<sup>1</sup>H NMR (400 MHz, CDCl<sub>3</sub>): δ = 7.81 – 7.78 (m, 2H), 7.77 – 7.73 (m, 2H), 7.64 – 7.61 (m, 2H), 7.46 (s, 1H), 7.44 – 7.40 (m, 3H), 1.82 (s, 6H).

<sup>13</sup>C NMR (100 MHz, CDCl<sub>3</sub>): δ = 168.5, 168.0, 153.2, 140.5, 132.2, 131.8, 129.8, 129.3, 128.7, 128.1, 127.2, 118.3, 114.3, 63.7, 24.3.

HRMS (ESI): [M+H<sup>+</sup>]calcd for C<sub>20</sub>H<sub>17</sub>N<sub>2</sub>O<sub>2</sub><sup>+</sup>, 317.1285; found, 317.1296.



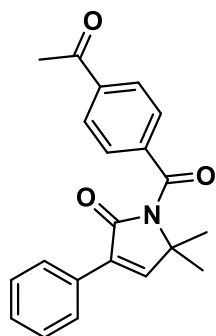

**2m**

**1-(4-Acetylbenzoyl)-5,5-dimethyl-3-phenyl-1,5-dihydro-2H-pyrrol-2-one**

According to general procedure for reaction, the crude residue was purified by flash chromatography (petroleum ether / acetone = 10:1) to give the product as a **white solid (121.5 mg, 73%)**. mp. **156-158 °C**

**<sup>1</sup>H NMR (400 MHz, CDCl<sub>3</sub>):** δ = 8.09 (s, 2H), 7.84 (s, 2H), 7.66 (s, 2H), 7.46 (s, 1H), 7.44 (s, 3H), 2.71 (s, 3H), 1.86 (s, 6H).

**<sup>13</sup>C NMR (100 MHz, CDCl<sub>3</sub>):** δ = 197.4, 169.0, 168.5, 152.9, 140.6, 138.5, 132.3, 130.0, 129.2, 128.6, 128.0, 127.7, 127.2, 63.7, 26.8, 24.4.

**HRMS (ESI):** [M+H<sup>+</sup>]calcd for C<sub>21</sub>H<sub>20</sub>NO<sub>3</sub><sup>+</sup>, 334.1438; found, 334.1451.

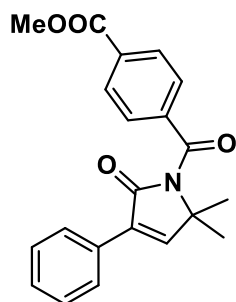

**2n**

**Methyl 4-(2,2-dimethyl-5-oxo-4-phenyl-2,5-dihydro-1H-pyrrole-1-carbonyl)benzoate**

According to general procedure for reaction, the crude residue was purified by flash chromatography (petroleum ether / acetone = 10:1) to give the product as a **white solid (143.1 mg, 82%)**. mp. **123-125 °C**

**<sup>1</sup>H NMR (400 MHz, CDCl<sub>3</sub>):** δ = 8.10 (d, *J* = 8.5 Hz, 2H), 7.78 – 7.74 (m, 2H), 7.57 – 7.55 (m, 2H), 7.38 (s, 1H), 7.37 (dd, *J* = 5.5, 2.0 Hz, 3H), 3.93 (s, 3H), 1.77 (s, 6H).

**<sup>13</sup>C NMR (100 MHz, CDCl<sub>3</sub>):** δ = 169.1, 168.4, 166.4, 152.8, 140.5, 132.3, 132.0, 129.9, 129.3, 129.2, 128.6, 127.5, 127.2, 63.6, 52.3, 24.4.

**HRMS (ESI):** [M+H<sup>+</sup>]calcd for C<sub>21</sub>H<sub>20</sub>NO<sub>4</sub><sup>+</sup>, 350.1387; found, 350.1405.

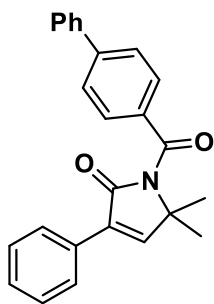

**2o**

**1-([1,1'-Biphenyl]-4-carbonyl)-5,5-dimethyl-3-phenyl-1,5-dihydro-2H-pyrrol-2-one**

According to general procedure for reaction, the crude residue was purified by flash chromatography (petroleum ether / acetone = 10:1) to give the product as a **white solid (150.5 mg, 82%)**. mp. **201-203 °C**

**<sup>1</sup>H NMR (400 MHz, CDCl<sub>3</sub>):** δ = 7.86 (dd, *J* = 7.8, 1.7 Hz, 2H), 7.72 – 7.64 (m, 6H), 7.50 (t, *J* = 7.5 Hz, 2H), 7.44 (s, 1H), 7.43 – 7.39 (m, 4H), 1.83 (s, 6H).

**<sup>13</sup>C NMR (100 MHz, CDCl<sub>3</sub>):** δ = 169.8, 168.5, 152.6, 144.1, 140.3, 134.9, 132.5, 130.2, 129.1, 128.8, 128.7, 128.6, 127.8, 127.3, 127.2, 126.7, 63.7, 24.6.

**HRMS (ESI):** [M+H<sup>+</sup>]calcd for C<sub>25</sub>H<sub>22</sub>NO<sub>2</sub><sup>+</sup>, 368.1645; found, 368.1655.

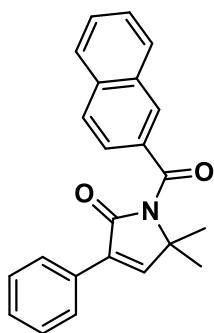

**2p**

**1-(2-Naphthoyl)-5,5-dimethyl-3-phenyl-1,5-dihydro-2H-pyrrol-2-one**

According to general procedure for reaction, the crude residue was purified by flash chromatography (petroleum ether / acetone = 10:1) to give the product as a **white solid (146.6 mg, 86%)**. mp. **170-172 °C**

**<sup>1</sup>H NMR (400 MHz, CDCl<sub>3</sub>):** δ = 8.15 (s, 1H), 7.94 (dd, *J* = 16.9, 8.2 Hz, 3H), 7.88 – 7.83 (m, 2H), 7.65 – 7.55 (m, 3H), 7.44 (s, 1H), 7.42 (dd, *J* = 5.9, 4.6 Hz, 3H), 1.87 (s, 6H).

**<sup>13</sup>C NMR (100 MHz, CDCl<sub>3</sub>):** δ = 170.1, 168.4, 152.6, 134.6, 133.7, 132.5, 132.4, 130.2, 129.1, 129.0, 128.6, 127.8, 127.6, 127.5, 127.2, 126.5, 124.6, 63.6, 24.6.

**HRMS (ESI):** [M+H<sup>+</sup>]calcd for C<sub>23</sub>H<sub>20</sub>NO<sub>2</sub><sup>+</sup>, 342.1489; found, 342.1502.

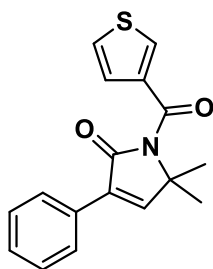

**2q**

**5,5-Dimethyl-3-phenyl-1-(thiophene-3-carbonyl)-1,5-dihydro-2H-pyrrol-2-one**

According to general procedure for reaction, the crude residue was purified by flash chromatography (petroleum ether / acetone = 5:1) to give the product as a **white solid (112.8 mg, 76%)**. mp. 108-110 °C

**<sup>1</sup>H NMR (400 MHz, CDCl<sub>3</sub>):** δ = 7.93 (dd, *J* = 2.9, 1.3 Hz, 1H), 7.88 – 7.85 (m, 2H), 7.46 – 7.41 (m, 3H), 7.38 (s, 1H), 7.36 (dd, *J* = 5.1, 1.3 Hz, 1H), 7.33 – 7.30 (m, 1H), 1.78 (s, 6H).

**<sup>13</sup>C NMR (100 MHz, CDCl<sub>3</sub>):** δ = 168.4, 164.3, 152.5, 137.3, 132.5, 131.0, 130.3, 129.1, 128.6, 127.8, 127.2, 124.6, 63.8, 24.7.

**HRMS (ESI):** [M+H<sup>+</sup>]calcd for C<sub>17</sub>H<sub>16</sub>NO<sub>2</sub>S<sup>+</sup>, 298.0896; found, 298.0911.

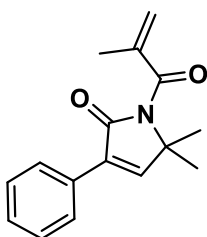

**2r**

**1-Methacryloyl-5,5-dimethyl-3-phenyl-1,5-dihydro-2H-pyrrol-2-one**

According to general procedure for reaction, the crude residue was purified by flash chromatography (petroleum ether / acetone = 10:1) to give the product as a **white solid (89.2 mg, 70%)**. mp. 73-75 °C

**<sup>1</sup>H NMR (400 MHz, CDCl<sub>3</sub>):** δ = 7.86 (dd, *J* = 7.9, 1.5 Hz, 2H), 7.46 – 7.41 (m, 3H), 7.35 (s, 1H), 5.31 (s, 1H), 5.24 (s, 1H), 2.09 (s, 3H), 1.70 (s, 6H).

**<sup>13</sup>C NMR (100 MHz, CDCl<sub>3</sub>):** δ = 171.2, 168.2, 152.7, 142.8, 132.4, 130.2, 129.1, 128.6, 127.2, 116.7, 63.0, 24.1, 19.2.

**HRMS (ESI):** [M+H<sup>+</sup>]calcd for C<sub>16</sub>H<sub>18</sub>NO<sub>2</sub><sup>+</sup>, 256.1332; found, 256.1351.

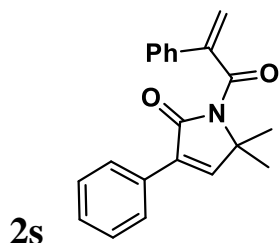

**5,5-Dimethyl-3-phenyl-1-(2-phenylacryloyl)-1,5-dihydro-2H-pyrrol-2-one**

According to general procedure for reaction, the crude residue was purified by flash chromatography (petroleum ether / acetone = 10:1) to give the product as a **green oil** (107.8 mg, 68%).

$^1\text{H NMR}$  (400 MHz,  $\text{CDCl}_3$ ):  $\delta$  = 7.75 – 7.72 (m, 2H), 7.48 (dd,  $J$  = 5.2, 3.0 Hz, 3H), 7.39 – 7.36 (m, 5H), 7.33 (s, 1H), 5.78 (s, 1H), 5.47 (s, 1H), 1.80 (s, 6H).

$^{13}\text{C NMR}$  (100 MHz,  $\text{CDCl}_3$ ):  $\delta$  = 169.2, 167.4, 152.7, 146.9, 136.0, 132.3, 131.7, 130.0, 129.2, 129.0, 128.8, 128.6, 128.5, 128.5, 128.3, 128.2, 127.4, 127.3, 127.2, 127.1, 125.9, 114.9, 63.0, 24.0.

**HRMS (ESI):**  $[\text{M}+\text{H}^+]$ calcd for  $\text{C}_{21}\text{H}_{21}\text{NO}_2^+$ , 318.1489; found, 318.1502.

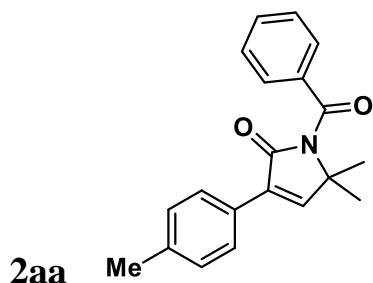

**1-Benzoyl-5,5-dimethyl-3-(p-tolyl)-1,5-dihydro-2H-pyrrol-2-one**

According to general procedure for reaction, the crude residue was purified by flash chromatography (petroleum ether / acetone = 10:1) to give the product as a **white solid** (132.7 mg, 87%). mp. 146-148 °C

$^1\text{H NMR}$  (400 MHz,  $\text{CDCl}_3$ ):  $\delta$  = 7.77 (d,  $J$  = 8.2 Hz, 2H), 7.63 – 7.54 (m, 3H), 7.48 (t,  $J$  = 7.4 Hz, 2H), 7.37 (s, 1H), 7.25 (d,  $J$  = 8.0 Hz, 2H), 2.42 (s, 3H), 1.82 (s, 6H).

$^{13}\text{C NMR}$  (100 MHz,  $\text{CDCl}_3$ ):  $\delta$  = 170.1, 168.6, 151.7, 139.1, 136.4, 132.2, 131.2, 129.2, 128.0, 127.9, 127.4, 127.1, 63.5, 24.6, 21.4.

**HRMS (ESI):**  $[\text{M}+\text{H}^+]$ calcd for  $\text{C}_{20}\text{H}_{20}\text{NO}_2^+$ , 306.1489; found, 306.1507.

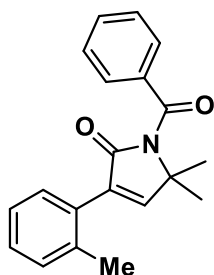

**2ab**

**1-Benzoyl-5,5-dimethyl-3-(*o*-tolyl)-1,5-dihydro-2H-pyrrol-2-one**

According to general procedure for reaction, the crude residue was purified by flash chromatography (petroleum ether / acetone = 10:1) to give the product as a **white solid (106.7 mg, 70%)**. mp. **143-145 °C**

**<sup>1</sup>H NMR (400 MHz, CDCl<sub>3</sub>):** δ = 7.60 – 7.51 (m, 3H), 7.45 (t, *J* = 7.5 Hz, 2H), 7.36 – 7.24 (m, 4H), 7.20 (s, 1H), 2.37 (s, 3H), 1.85 (s, 6H).

**<sup>13</sup>C NMR (100 MHz, CDCl<sub>3</sub>):** δ = 170.1, 168.5, 155.7, 136.5, 136.1, 134.5, 131.2, 130.4, 130.0, 129.7, 128.8, 128.0, 127.9, 125.7, 64.1, 24.7, 20.4.

**HRMS (ESI):** [M+H<sup>+</sup>]calcd for C<sub>20</sub>H<sub>20</sub>NO<sub>2</sub><sup>+</sup>, 306.1489; found, 306.1506.

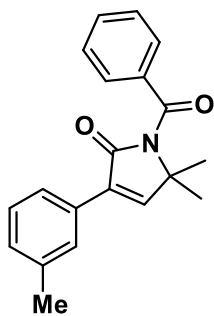

**2ac**

**1-Benzoyl-5,5-dimethyl-3-(*m*-tolyl)-1,5-dihydro-2H-pyrrol-2-one**

According to general procedure for reaction, the crude residue was purified by flash chromatography (petroleum ether / acetone = 10:1) to give the product as a **white solid (122.0 mg, 80%)**. mp. **81-83 °C**

**<sup>1</sup>H NMR (400 MHz, CDCl<sub>3</sub>):** δ = 7.73 (s, 1H), 7.68 – 7.55 (m, 4H), 7.50 (t, *J* = 7.4 Hz, 2H), 7.42 (s, 1H), 7.37 – 7.32 (m, 1H), 7.25 (d, *J* = 7.6 Hz, 1H), 2.43 (s, 3H), 1.84 (s, 6H).

**<sup>13</sup>C NMR (100 MHz, CDCl<sub>3</sub>):** δ = 170.1, 168.5, 152.6, 138.2, 136.4, 132.5, 131.2, 130.2, 129.9, 128.5, 128.0, 127.9, 127.8, 124.4, 63.5, 24.6, 21.5.

**HRMS (ESI):** [M+N a<sup>+</sup>]calcd for C<sub>20</sub>H<sub>20</sub>NO<sub>2</sub><sup>+</sup>, 306.1489; found, 306.1507.

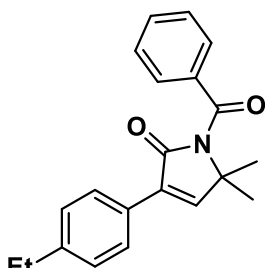

**2ad**

Et

**1-Benzoyl-3-(4-ethylphenyl)-5,5-dimethyl-1,5-dihydro-2H-pyrrol-2-one**

According to general procedure for reaction, the crude residue was purified by flash chromatography (petroleum ether / acetone = 10:1) to give the product as a **white solid** (129.2 mg, 81%). mp. 125-127 °C

<sup>1</sup>H NMR (400 MHz, CDCl<sub>3</sub>): δ = 7.78 (d, *J* = 8.2 Hz, 2H), 7.62 – 7.53 (m, 3H), 7.48 (t, *J* = 7.4 Hz, 2H), 7.37 (s, 1H), 7.27 (d, *J* = 8.1 Hz, 2H), 2.71 (q, *J* = 7.6 Hz, 2H), 1.81 (s, 6H), 1.28 (t, *J* = 7.6 Hz, 3H).

<sup>13</sup>C NMR (100 MHz, CDCl<sub>3</sub>): δ = 170.1, 168.6, 151.8, 145.5, 136.3, 132.3, 131.2, 128.1, 128.0, 127.9, 127.6, 127.2, 63.5, 28.7, 24.6, 15.5.

HRMS (ESI): [M+H<sup>+</sup>]calcd for C<sub>21</sub>H<sub>22</sub>NO<sub>2</sub><sup>+</sup>, 320.1645; found, 320.1662.

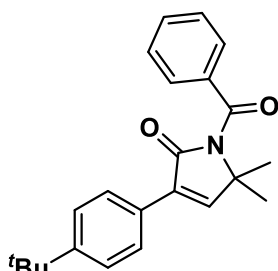

**2ae**

<sup>t</sup>Bu

**1-Benzoyl-3-(4-(tert-butyl)phenyl)-5,5-dimethyl-1,5-dihydro-2H-pyrrol-2-one**

According to general procedure for reaction, the crude residue was purified by flash chromatography (petroleum ether / acetone = 10:1) to give the product as a **white solid** (154.4 mg, 89%). mp. 127-129 °C

<sup>1</sup>H NMR (400 MHz, CDCl<sub>3</sub>): δ = 7.82 – 7.77 (m, 2H), 7.61 – 7.53 (m, 3H), 7.46 (dd, *J* = 11.9, 5.2 Hz, 4H), 7.37 (s, 1H), 1.81 (s, 6H), 1.37 (s, 9H).

<sup>13</sup>C NMR (100 MHz, CDCl<sub>3</sub>): δ = 170.1, 168.6, 152.3, 151.9, 136.3, 132.3, 131.2, 128.0, 127.4, 126.9, 125.5, 63.5, 34.7, 31.2, 24.6.

HRMS (ESI): [M+H<sup>+</sup>]calcd for C<sub>23</sub>H<sub>26</sub>NO<sub>2</sub><sup>+</sup>, 348.1958; found, 348.1978.

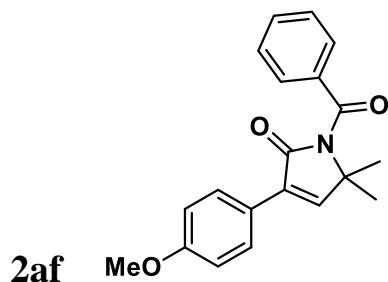

**1-Benzoyl-3-(4-methoxyphenyl)-5,5-dimethyl-1,5-dihydro-2H-pyrrol-2-one**

According to general procedure for reaction, the crude residue was purified by flash chromatography (petroleum ether / acetone = 10:1) to give the product as a **white solid** (146.0 mg, 91%). mp. 159-161 °C

<sup>1</sup>H NMR (400 MHz, CDCl<sub>3</sub>): δ = 7.82 (d, *J* = 8.7 Hz, 2H), 7.61 – 7.52 (m, 3H), 7.47 (t, *J* = 7.4 Hz, 2H), 7.30 (s, 1H), 6.94 (d, *J* = 8.8 Hz, 2H), 3.86 (s, 3H), 1.80 (s, 6H).

<sup>13</sup>C NMR (100 MHz, CDCl<sub>3</sub>): δ = 170.1, 168.7, 160.2, 150.6, 136.4, 131.8, 131.2, 128.5, 127.9, 127.9, 122.8, 113.9, 63.4, 55.3, 24.7.

HRMS (ESI): [M+H<sup>+</sup>]calcd for C<sub>20</sub>H<sub>20</sub>NO<sub>3</sub><sup>+</sup>, 322.1438; found, 322.1456.

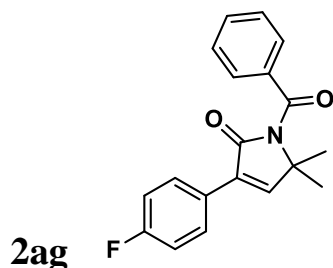

**1-Benzoyl-3-(4-fluorophenyl)-5,5-dimethyl-1,5-dihydro-2H-pyrrol-2-one**

According to general procedure for reaction, the crude residue was purified by flash chromatography (petroleum ether / acetone = 5:1) to give the product as a **white solid** (115.9 mg, 75%). mp. 150-152 °C

<sup>1</sup>H NMR (400 MHz, CDCl<sub>3</sub>): δ = 7.87 – 7.82 (m, 2H), 7.60 – 7.54 (m, 3H), 7.48 (t, *J* = 7.5 Hz, 2H), 7.37 (s, 1H), 7.11 (t, *J* = 8.7 Hz, 2H), 1.81 (s, 6H).

<sup>13</sup>C NMR (100 MHz, CDCl<sub>3</sub>): δ = 170.0, 168.3, 163.2 (d, *J* = 249.4 Hz), 152.1, 136.2, 131.5, 131.3, 129.1 (d, *J* = 8.1 Hz), 127.9 (d, *J* = 11.7 Hz), 126.3 (d, *J* = 3.3 Hz), 115.7, 115.5, 63.6, 24.6.

HRMS (ESI): [M+H<sup>+</sup>]calcd for C<sub>19</sub>H<sub>17</sub>FNO<sub>2</sub><sup>+</sup>, 310.1238; found, 310.1257.

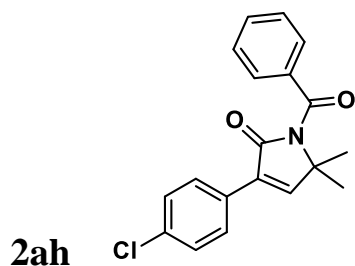

**1-Benzoyl-3-(4-chlorophenyl)-5,5-dimethyl-1,5-dihydro-2H-pyrrol-2-one**

According to general procedure for reaction, the crude residue was purified by flash chromatography (petroleum ether / acetone = 5:1) to give the product as a **white solid** (118.6 mg, 73%). mp. 114-116 °C

<sup>1</sup>H NMR (400 MHz, CDCl<sub>3</sub>): δ = 7.80 (d, *J* = 8.5 Hz, 2H), 7.60 – 7.54 (m, 3H), 7.48 (t, *J* = 7.5 Hz, 2H), 7.41 (d, *J* = 3.2 Hz, 2H), 7.38 (s, 1H), 1.81 (s, 6H).

<sup>13</sup>C NMR (100 MHz, CDCl<sub>3</sub>): δ = 170.0, 168.2, 152.7, 136.2, 135.1, 131.3, 128.8, 128.7, 128.5, 128.0, 127.9, 63.6, 24.5.

HRMS (ESI): [M+H<sup>+</sup>]calcd for C<sub>19</sub>H<sub>17</sub>ClNO<sub>2</sub><sup>+</sup>, 326.0942; found, 326.0955.

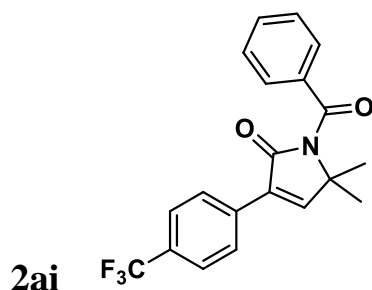

**1-Benzoyl-5,5-dimethyl-3-(4-(trifluoromethyl)phenyl)-1,5-dihydro-2H-pyrrol-2-one**

According to general procedure for reaction, the crude residue was purified by flash chromatography (petroleum ether / acetone = 5:1) to give the product as a **white solid** (129.2 mg, 72%). mp. 84-86 °C

<sup>1</sup>H NMR (400 MHz, CDCl<sub>3</sub>): δ = 7.98 (d, *J* = 8.1 Hz, 2H), 7.68 (d, *J* = 8.2 Hz, 2H), 7.61 – 7.56 (m, 3H), 7.52 (s, 1H), 7.49 (t, *J* = 7.4 Hz, 2H), 1.84 (s, 6H).

<sup>13</sup>C NMR (100 MHz, CDCl<sub>3</sub>): δ = 170.0, 167.9, 154.1, 136.0, 133.7, 131.4, 131.0, 130.7, 128.0, 127.9, 127.5, 125.4 (q, *J* = 3.9 Hz), 123.9 (q, *J* = 272.2 Hz), 63.8, 24.5.

HRMS (ESI): [M+H<sup>+</sup>]calcd for C<sub>20</sub>H<sub>17</sub>F<sub>3</sub>NO<sub>2</sub><sup>+</sup>, 360.1206; found, 360.1220.



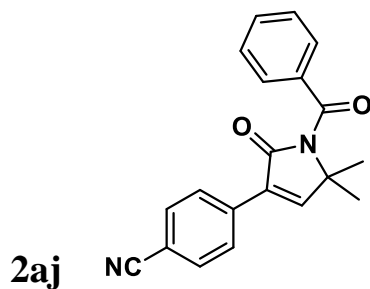

**4-(1-Benzoyl-5,5-dimethyl-2-oxo-2,5-dihydro-1H-pyrrol-3-yl)benzonitrile**

According to general procedure for reaction, the crude residue was purified by flash chromatography (petroleum ether / acetone = 5:1) to give the product as a **white solid (123.2 mg, 78%). mp. 163-165 °C**

**<sup>1</sup>H NMR (400 MHz, CDCl<sub>3</sub>):**  $\delta$  = 7.95 – 7.92 (m, 2H), 7.67 – 7.64 (m, 2H), 7.55 – 7.51 (m, 3H), 7.50 (s, 1H), 7.46 – 7.41 (m, 2H), 1.79 (s, 6H).

**<sup>13</sup>C NMR (100 MHz, CDCl<sub>3</sub>):**  $\delta$  = 169.9, 167.6, 154.8, 135.9, 134.6, 132.3, 131.5, 131.0, 128.0, 127.9, 127.8, 118.5, 112.6, 64.0, 24.4.

**HRMS (ESI):** [M+H<sup>+</sup>]calcd for C<sub>20</sub>H<sub>17</sub>N<sub>2</sub>O<sub>2</sub><sup>+</sup>, 317.1285; found, 317.1295.

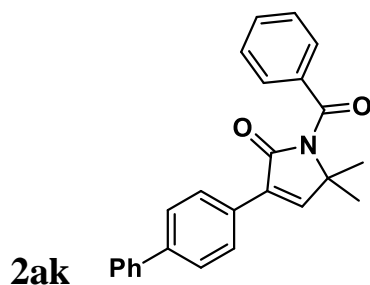

**3-([1,1'-Biphenyl]-4-yl)-1-benzoyl-5,5-dimethyl-1,5-dihydro-2H-pyrrol-2-one**

According to general procedure for reaction, the crude residue was purified by flash chromatography (petroleum ether / acetone = 10:1) to give the product as a **white solid (156.0 mg, 85%). mp. 157-159 °C**

**<sup>1</sup>H NMR (400 MHz, CDCl<sub>3</sub>):**  $\delta$  = 7.97 (d, *J* = 8.4 Hz, 2H), 7.68 (dd, *J* = 7.7, 5.1 Hz, 4H), 7.60 (ddd, *J* = 7.4, 6.9, 4.1 Hz, 3H), 7.54 – 7.49 (m, 4H), 7.46 (s, 1H), 7.43 (t, *J* = 7.3 Hz, 1H), 1.85 (s, 6H).

**<sup>13</sup>C NMR (100 MHz, CDCl<sub>3</sub>):**  $\delta$  = 170.1, 168.5, 152.4, 141.8, 140.4, 136.3, 132.0, 131.3, 129.2, 128.9, 128.0, 127.9, 127.7, 127.2, 127.1, 63.6, 24.6.

**HRMS (ESI):** [M+H<sup>+</sup>]calcd for C<sub>25</sub>H<sub>22</sub>NO<sub>2</sub><sup>+</sup>, 368.1645; found, 368.1657.

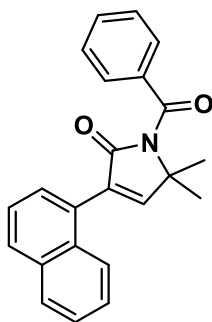

**2al**

**1-Benzoyl-5,5-dimethyl-3-(naphthalen-1-yl)-1,5-dihydro-2H-pyrrol-2-one**

According to general procedure for reaction, the crude residue was purified by flash chromatography (petroleum ether / acetone = 10:1) to give the product as a **white solid (146.6 mg, 86%)**. mp. 149-151 °C

<sup>1</sup>H NMR (400 MHz, CDCl<sub>3</sub>): δ = 7.98 – 7.90 (m, 3H), 7.66 – 7.50 (m, 7H), 7.48 – 7.42 (m, 2H), 7.42 (s, 1H), 1.94 (s, 6H).

<sup>13</sup>C NMR (100 MHz, CDCl<sub>3</sub>): δ = 170.1, 168.8, 156.8, 136.1, 133.8, 133.1, 131.4, 131.2, 129.3, 128.7, 128.0, 127.9, 127.7, 126.6, 126.0, 125.1, 124.6, 64.4, 24.8.

HRMS (ESI): [M+H<sup>+</sup>]calcd for C<sub>23</sub>H<sub>20</sub>NO<sub>2</sub><sup>+</sup>, 342.1489; found, 342.1507.

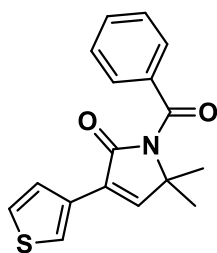

**2am**

**1-Benzoyl-5,5-dimethyl-3-(thiophen-3-yl)-1,5-dihydro-2H-pyrrol-2-one**

According to general procedure for reaction, the crude residue was purified by flash chromatography (petroleum ether / acetone = 10:1) to give the product as a **white solid (118.8 mg, 80%)**. mp. 108-110 °C

<sup>1</sup>H NMR (400 MHz, CDCl<sub>3</sub>): δ = 8.18 (dd, *J* = 2.9, 1.1 Hz, 1H), 7.61 – 7.56 (m, 3H), 7.49 (t, *J* = 7.4 Hz, 2H), 7.44 (dd, *J* = 5.1, 1.2 Hz, 1H), 7.41 – 7.37 (m, 1H), 7.29 (s, 1H), 1.81 (s, 6H).

<sup>13</sup>C NMR (100 MHz, CDCl<sub>3</sub>): δ = 170.0, 168.4, 150.1, 136.3, 131.3, 130.7, 128.0, 127.9, 125.9, 125.7, 125.0, 63.9, 24.7.

HRMS (ESI): [M+H<sup>+</sup>]calcd for C<sub>17</sub>H<sub>16</sub>NO<sub>2</sub>S<sup>+</sup>, 298.0896; found, 298.0910.

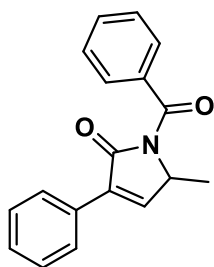

## 2ap

### 1-Benzoyl-5-methyl-3-phenyl-1,5-dihydro-2H-pyrrol-2-one

According to general procedure for reaction, the crude residue was purified by flash chromatography (petroleum ether / acetone = 10:1) to give the product as a **black solid (55.4 mg, 40%)**. mp. 114-116 °C

$^1\text{H NMR}$  (400 MHz,  $\text{CDCl}_3$ ):  $\delta$  = 7.83 (dd,  $J$  = 7.4, 1.8 Hz, 2H), 7.73 (d,  $J$  = 7.6 Hz, 2H), 7.59 (t,  $J$  = 7.4 Hz, 1H), 7.52 – 7.42 (m, 4H), 7.41 (s, 1H), 5.16 (qd,  $J$  = 6.7, 2.0 Hz, 1H), 1.62 (d,  $J$  = 6.7 Hz, 3H).

$^{13}\text{C NMR}$  (100 MHz,  $\text{CDCl}_3$ ):  $\delta$  = 169.6, 168.2, 146.0, 134.8, 132.0, 130.3, 129.1, 128.9, 128.5, 127.9, 127.2, 55.0, 17.7.

**HRMS (ESI):**  $[\text{M}+\text{H}^+]$ calcd for  $\text{C}_{18}\text{H}_{16}\text{NO}_2^+$ , 278.1176; found, 278.1192.

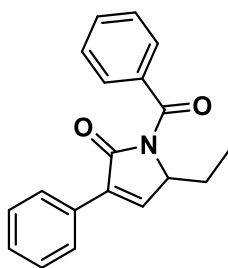

## 2aq

### 1-Benzoyl-5-ethyl-3-phenyl-1,5-dihydro-2H-pyrrol-2-one

According to general procedure for reaction, the crude residue was purified by flash chromatography (petroleum ether / acetone = 10:1) to give the product as a **black solid (61.1 mg, 42%)**. mp. 118-120 °C

$^1\text{H NMR}$  (400 MHz,  $\text{CDCl}_3$ ):  $\delta$  = 7.86 – 7.82 (m, 2H), 7.77 – 7.73 (m, 2H), 7.63 – 7.58 (m, 1H), 7.54 – 7.47 (m, 4H), 7.43 (s, 1H), 7.41 (d,  $J$  = 1.4 Hz, 1H), 5.17 (ddd,  $J$  = 7.2, 3.4, 2.4 Hz, 1H), 1.30 (s, 2H), 1.05 (t,  $J$  = 7.5 Hz, 3H).

$^{13}\text{C NMR}$  (101 MHz,  $\text{CDCl}_3$ ):  $\delta$  = 169.7, 168.6, 144.5, 135.6, 134.7, 132.1, 130.4, 129.1, 128.5, 127.9, 127.2, 59.6, 23.9, 8.3.

**HRMS (ESI):**  $[\text{M}+\text{H}^+]$ calcd for  $\text{C}_{19}\text{H}_{18}\text{NO}_2^+$ , 292.1332; found, 292.1343.

## 7. Characterization of Intermediates 2g'

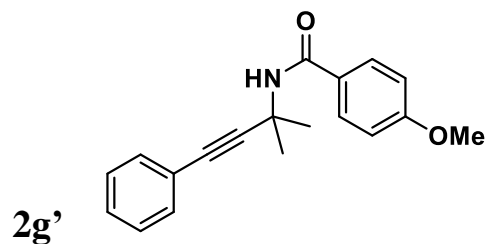

4-Methoxy-N-(2-methyl-4-phenylbut-3-yn-2-yl)benzamide

This compound was obtained as a white solid. mp. 175-177 °C.

$^1\text{H NMR}$  (400 MHz,  $\text{CDCl}_3$ ):  $\delta$  = 7.78 (d,  $J$  = 8.7 Hz, 1H), 7.50 – 7.46 (m, 1H), 7.31 (dd,  $J$  = 6.0, 2.6 Hz, 1H), 6.92 (d,  $J$  = 8.7 Hz, 1H), 6.41 (s, 1H), 3.85 (s, 2H), 1.89 (s, 3H).

$^{13}\text{C NMR}$  (100 MHz,  $\text{CDCl}_3$ ):  $\delta$  = 166.0, 162.1, 131.8, 128.7, 128.2, 127.4, 122.9, 113.6, 93.0, 81.3, 55.4, 48.9, 29.1.

## 8. References

- 1 J. Ying, Z. Le and X.-F. Wu, *Org. Lett.*, 2020, **22**, 194-198.
- 2 A. Kolleth, S. Christoph, S. Arseniyadis and J. Cossy, *Chem. Commun.*, 2012, **48**, 10511-10513.
- 3 (a) L. Jiang, X. Qi and X.-F. Wu, *Tetrahedron*, 2016, **57**, 3368-3370; (b) L. Jiang, R. Li, C. Zhou, X. Qi, J.-B. Peng and X.-F. Wu, *Mol. Catal.*, 2017, **433**, 8-11.

## 9. Spectra of TFBen and Substrates

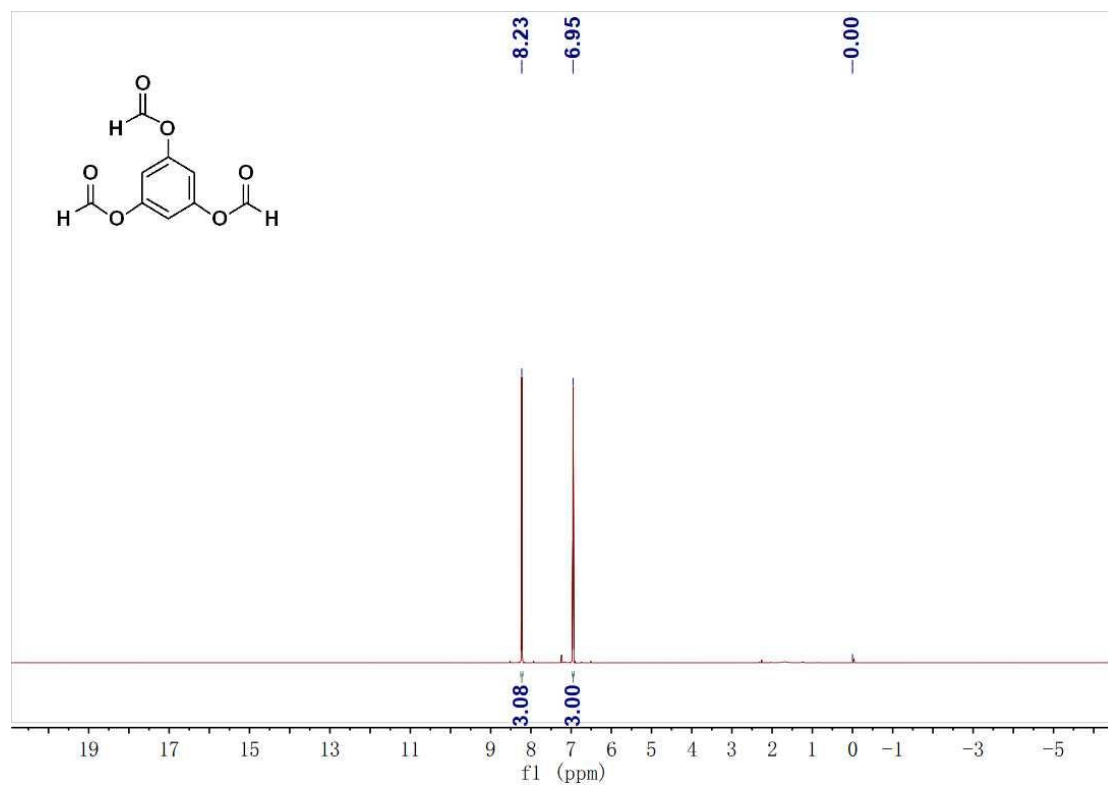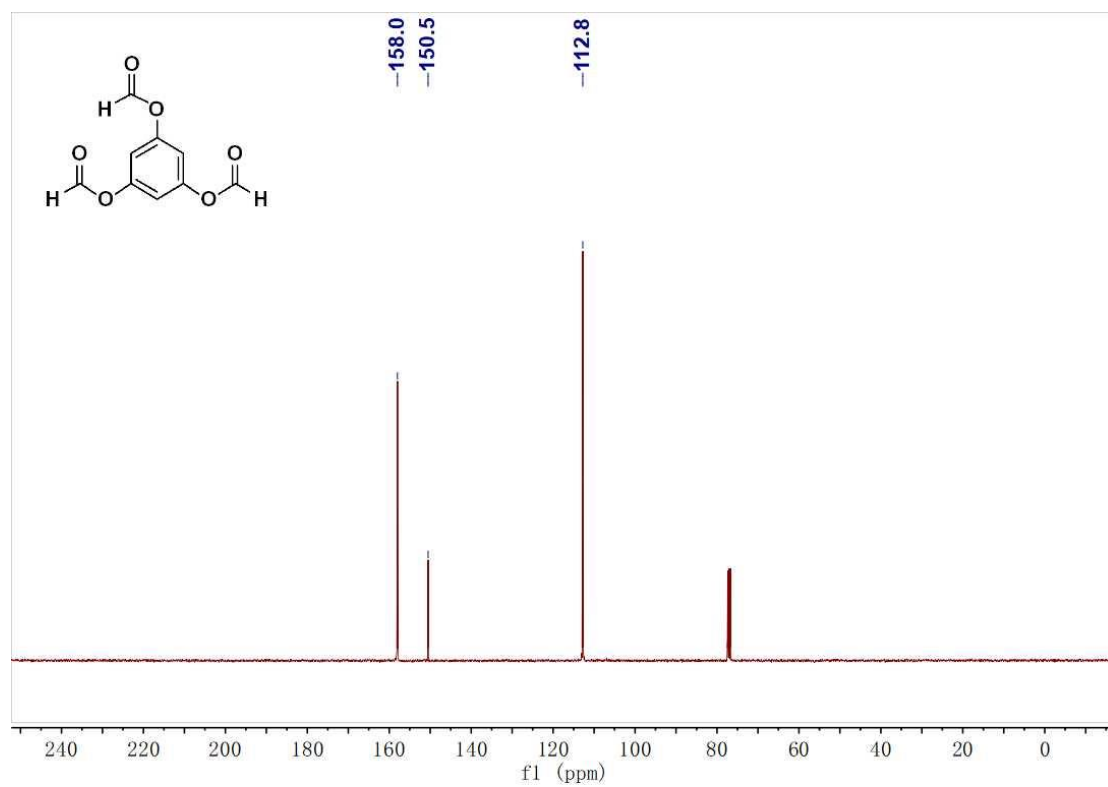

# 1a

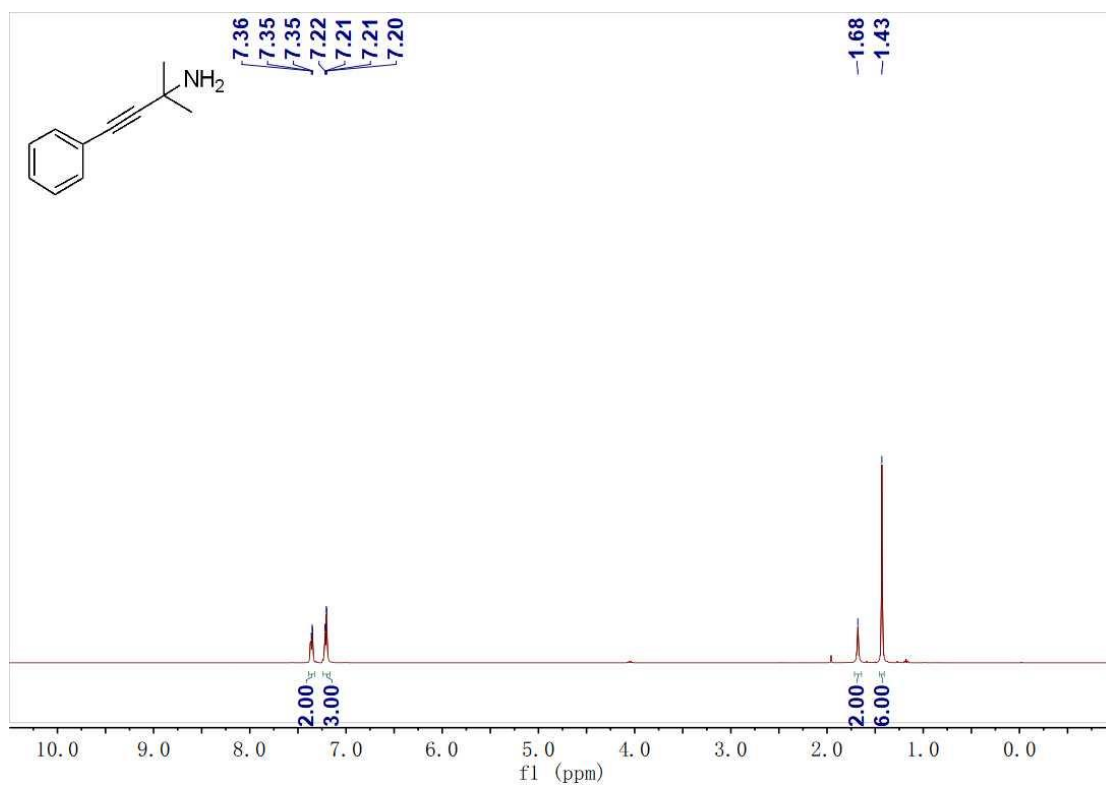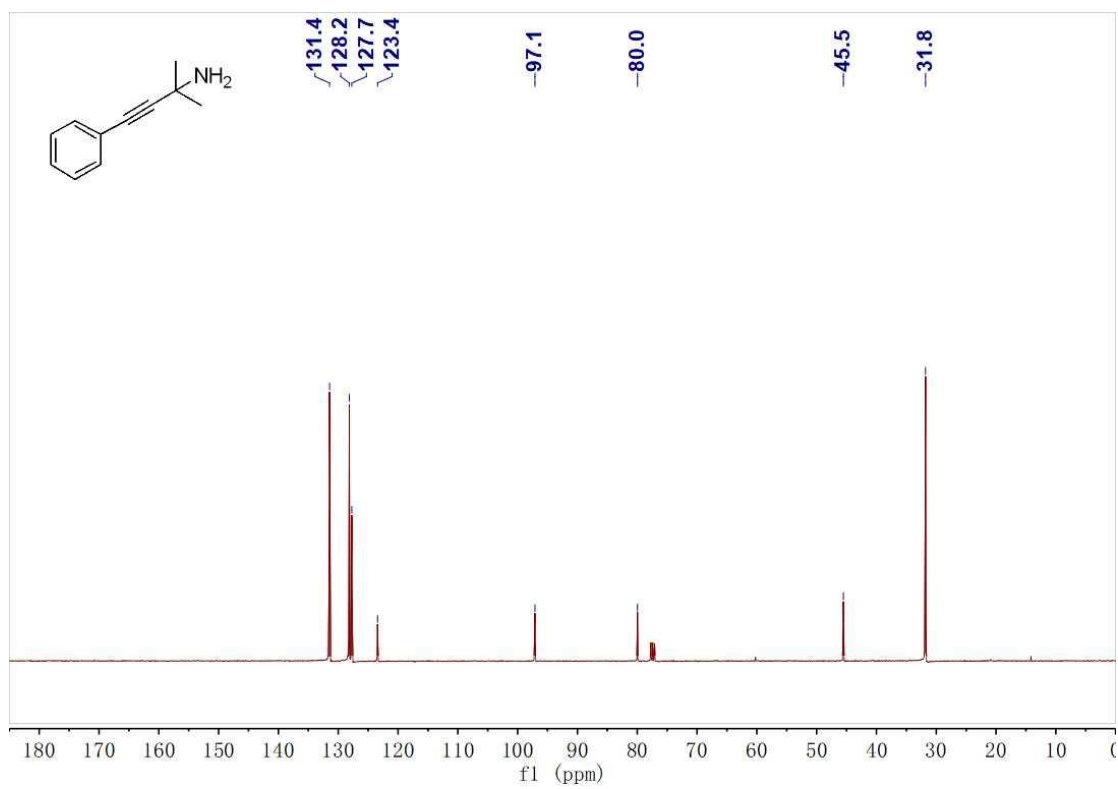

# 1aa

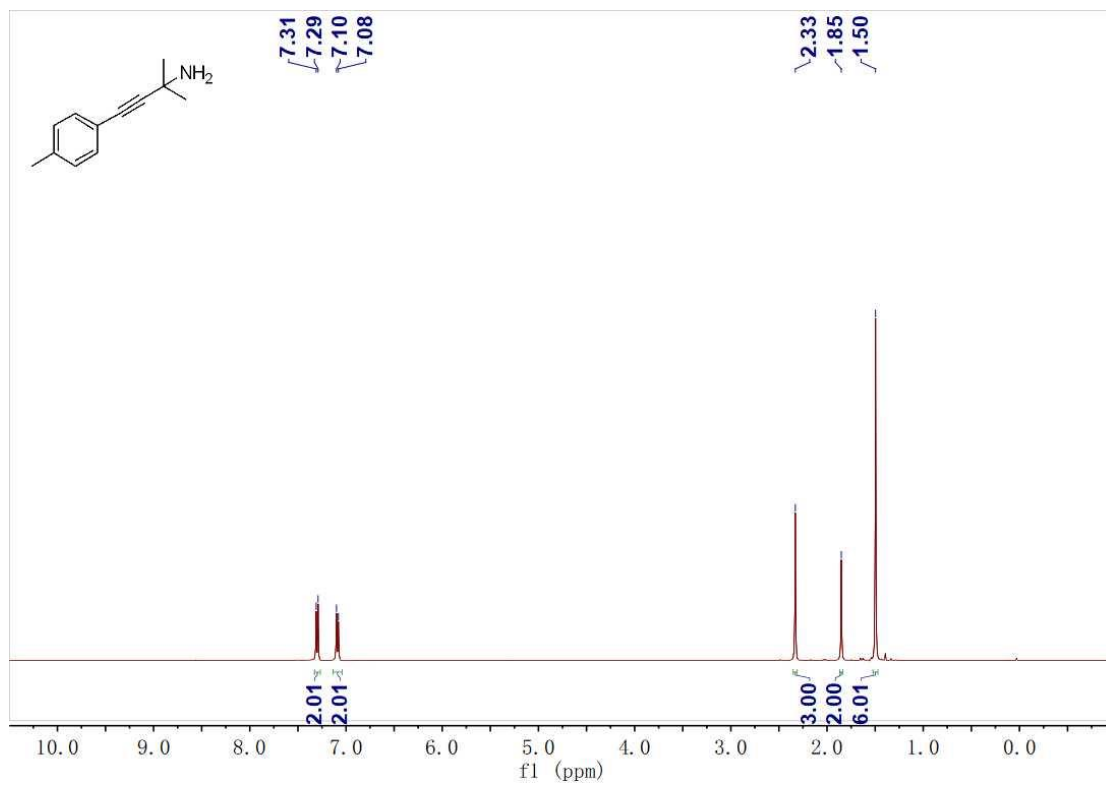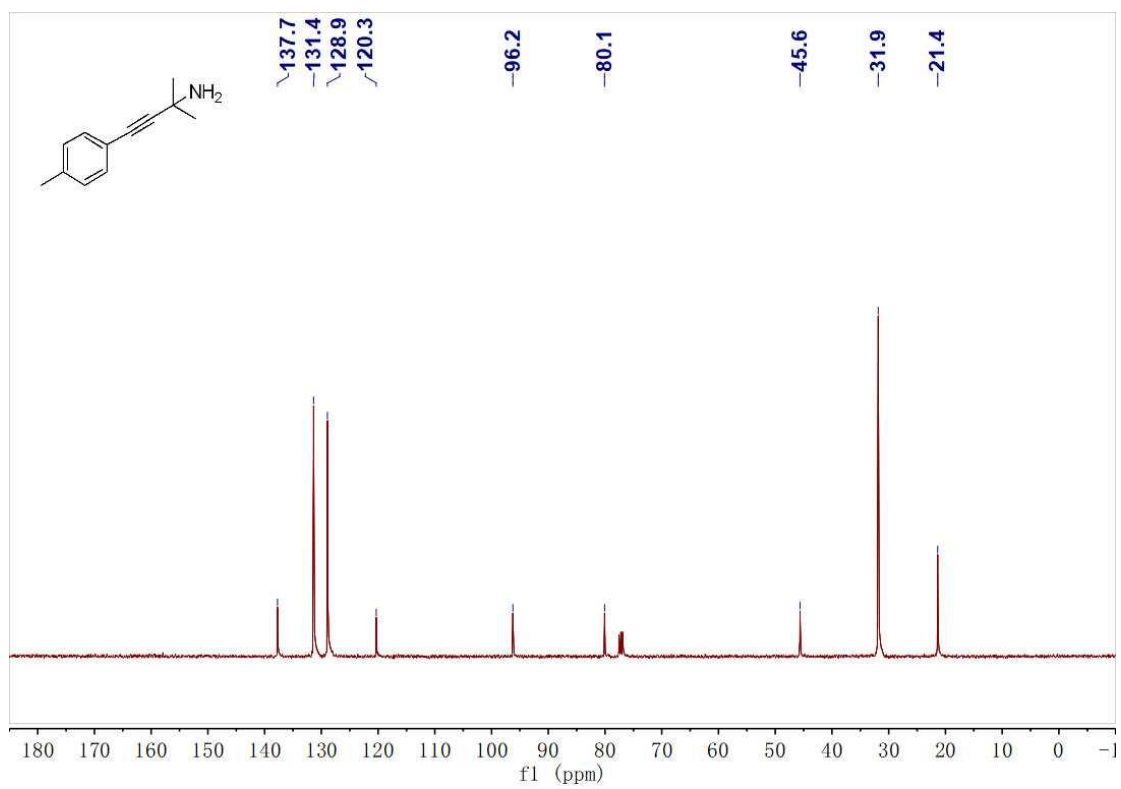

# 1ab

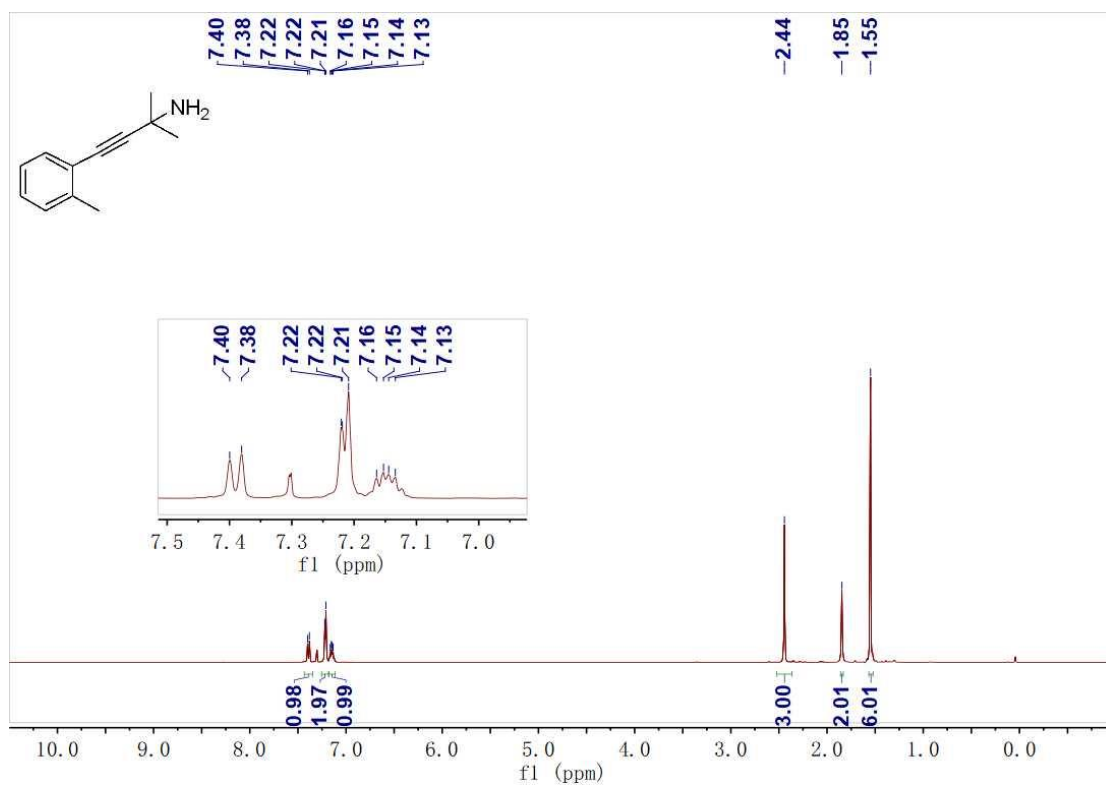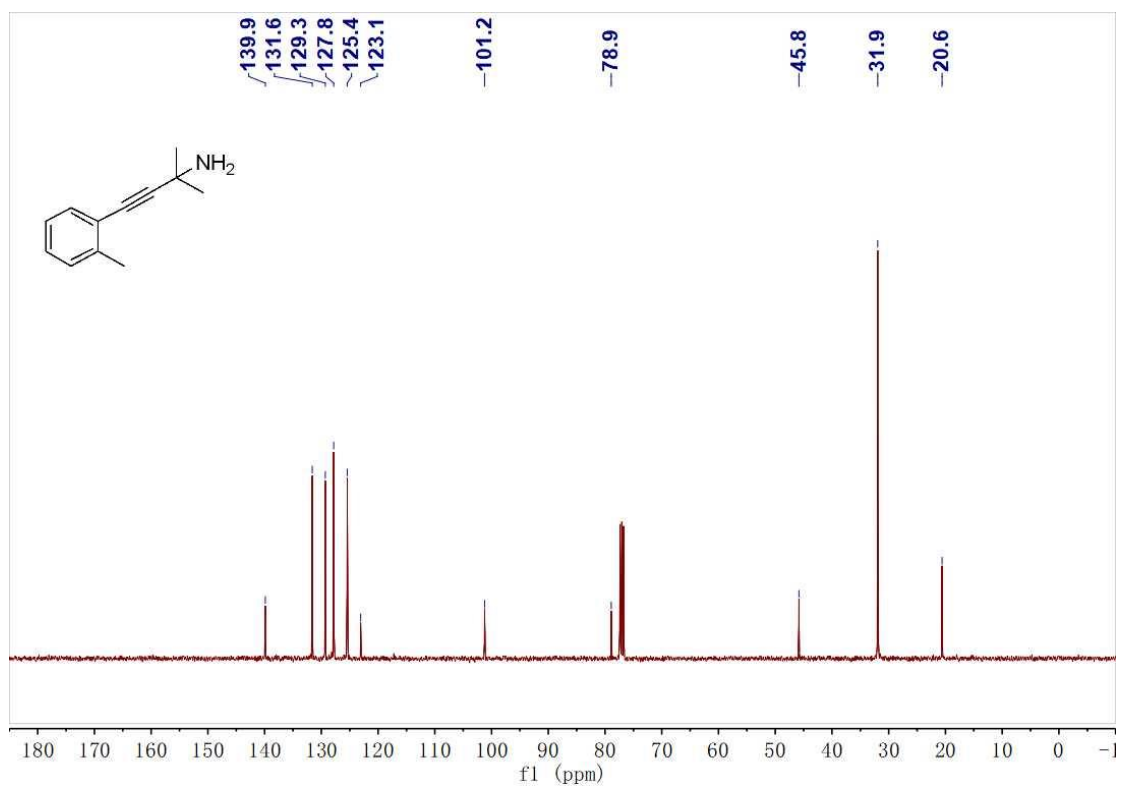



# 1ac

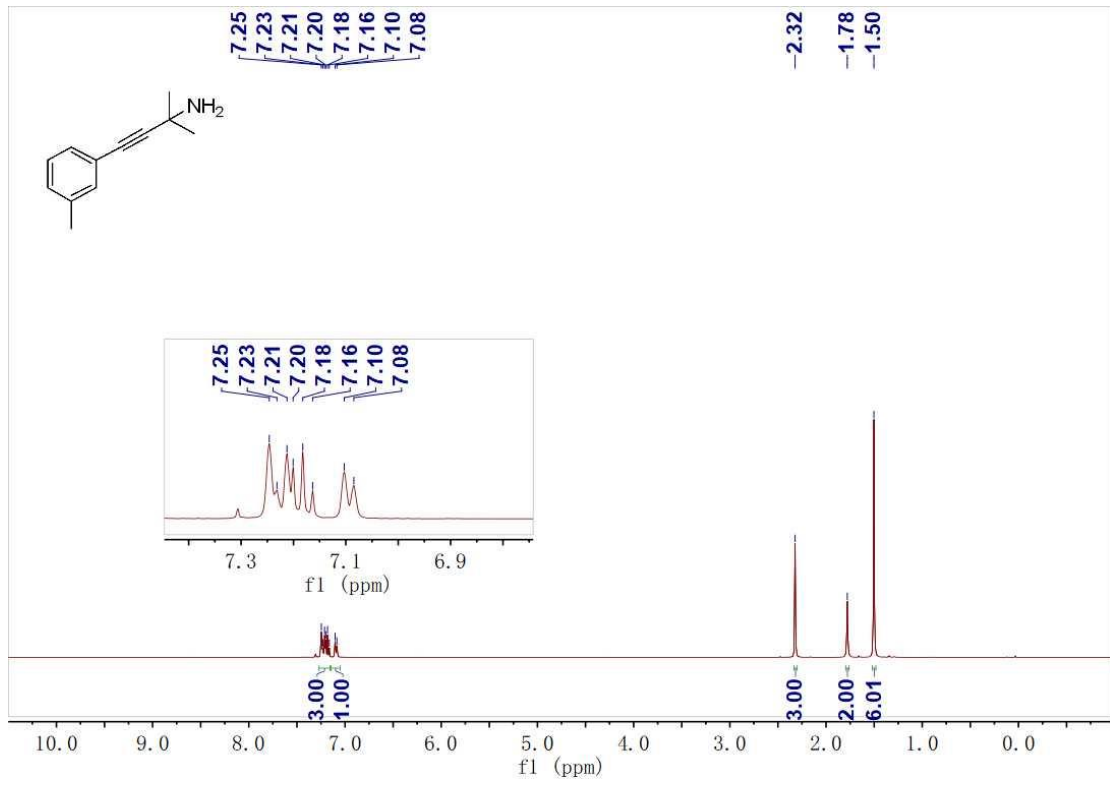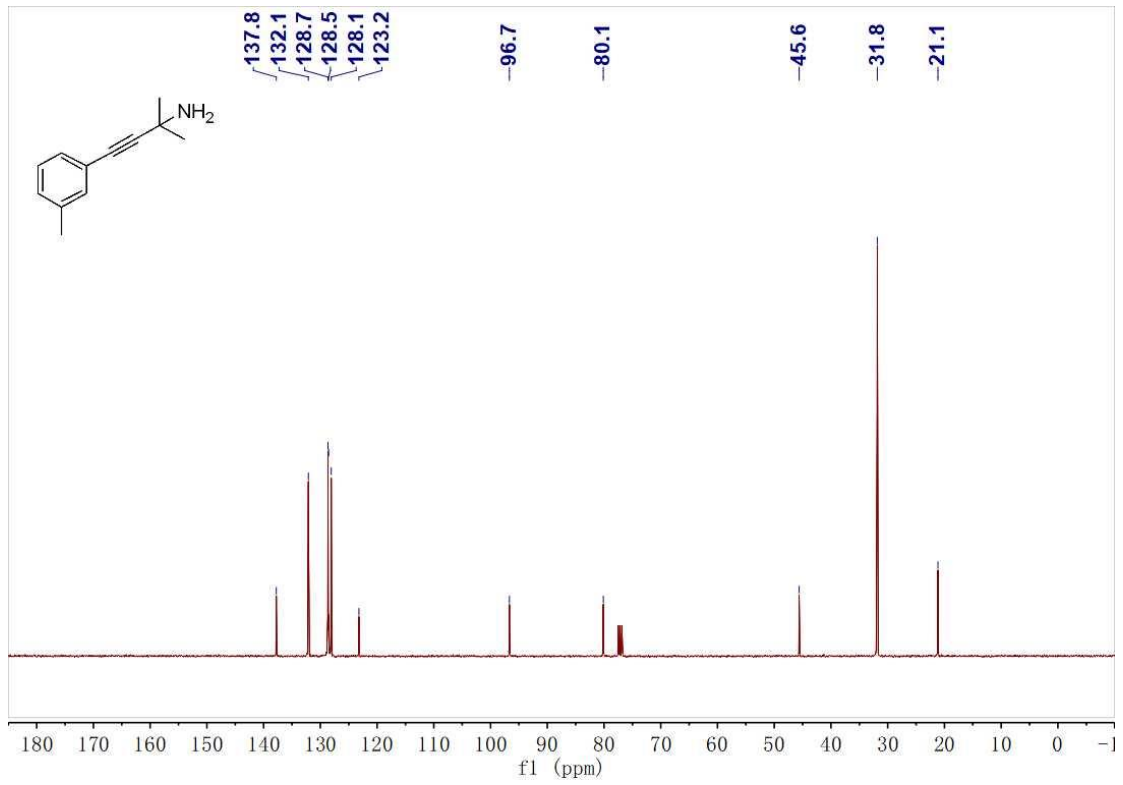

# 1ad

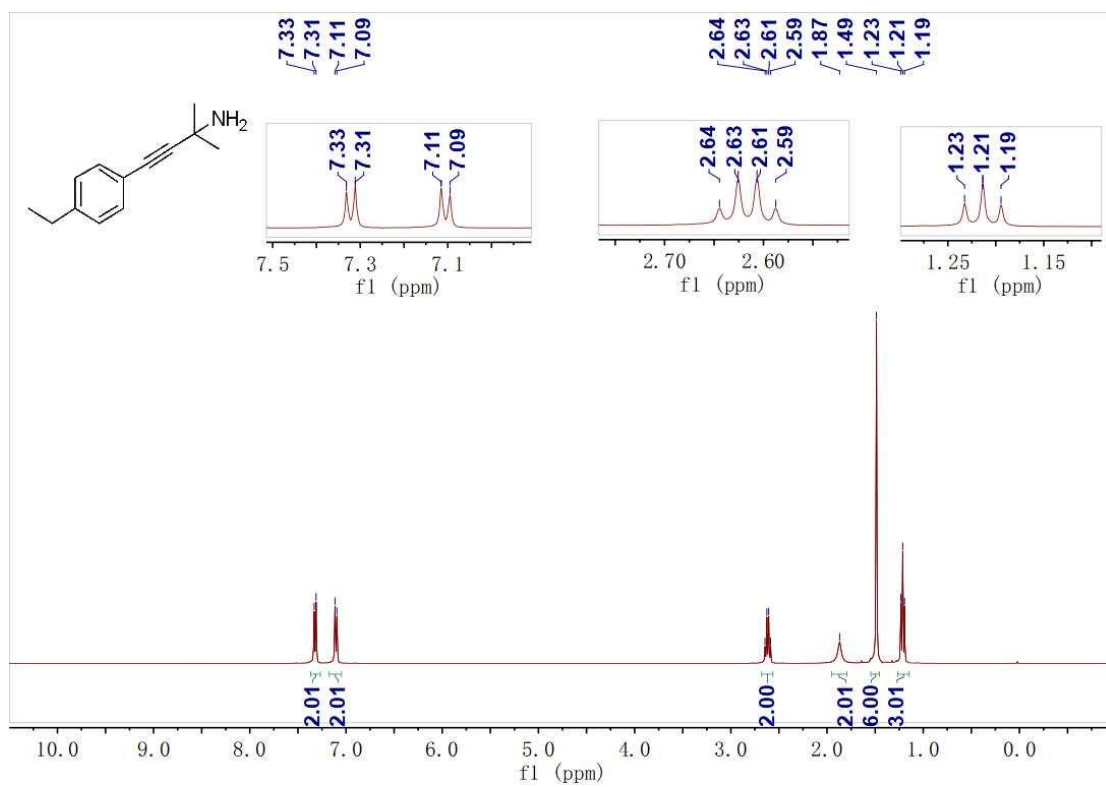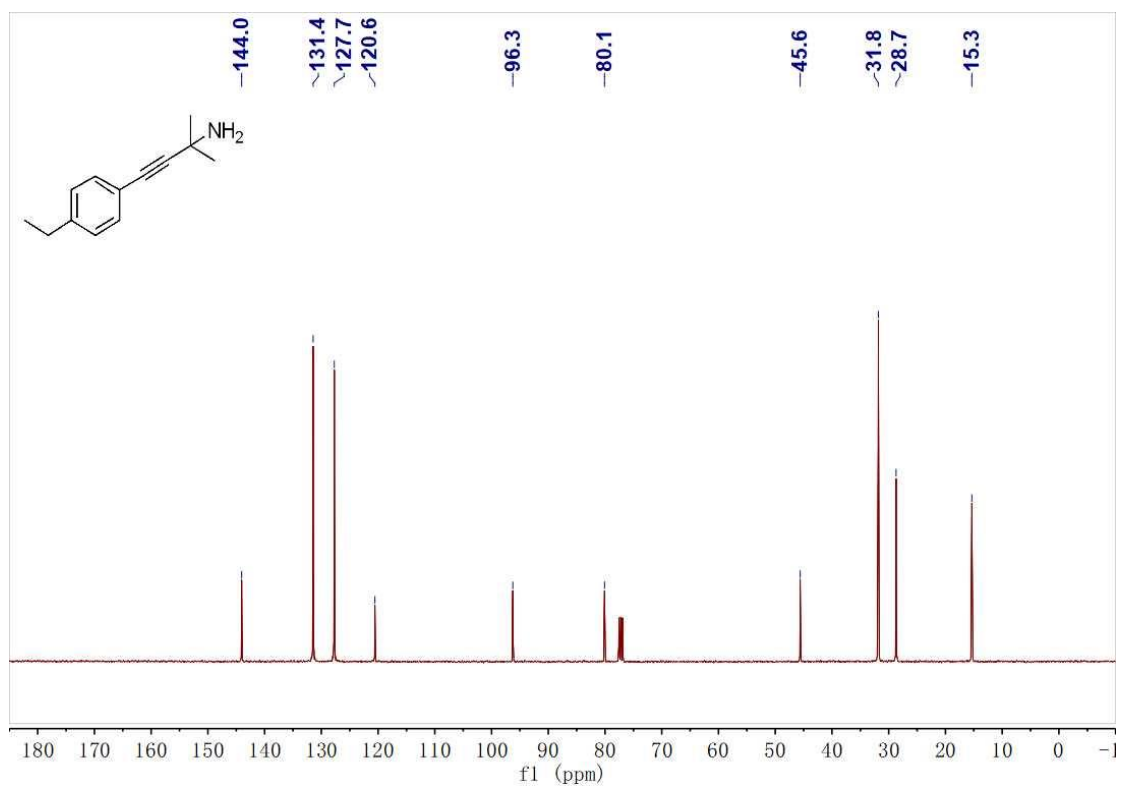

# 1ae

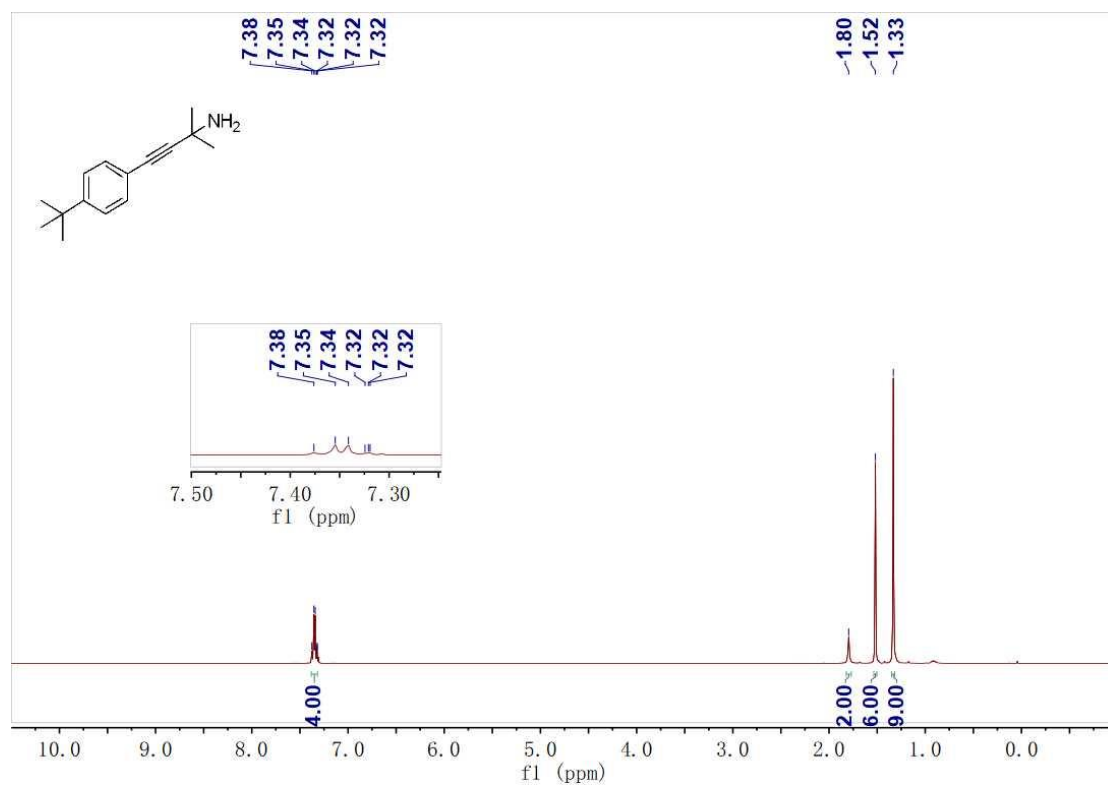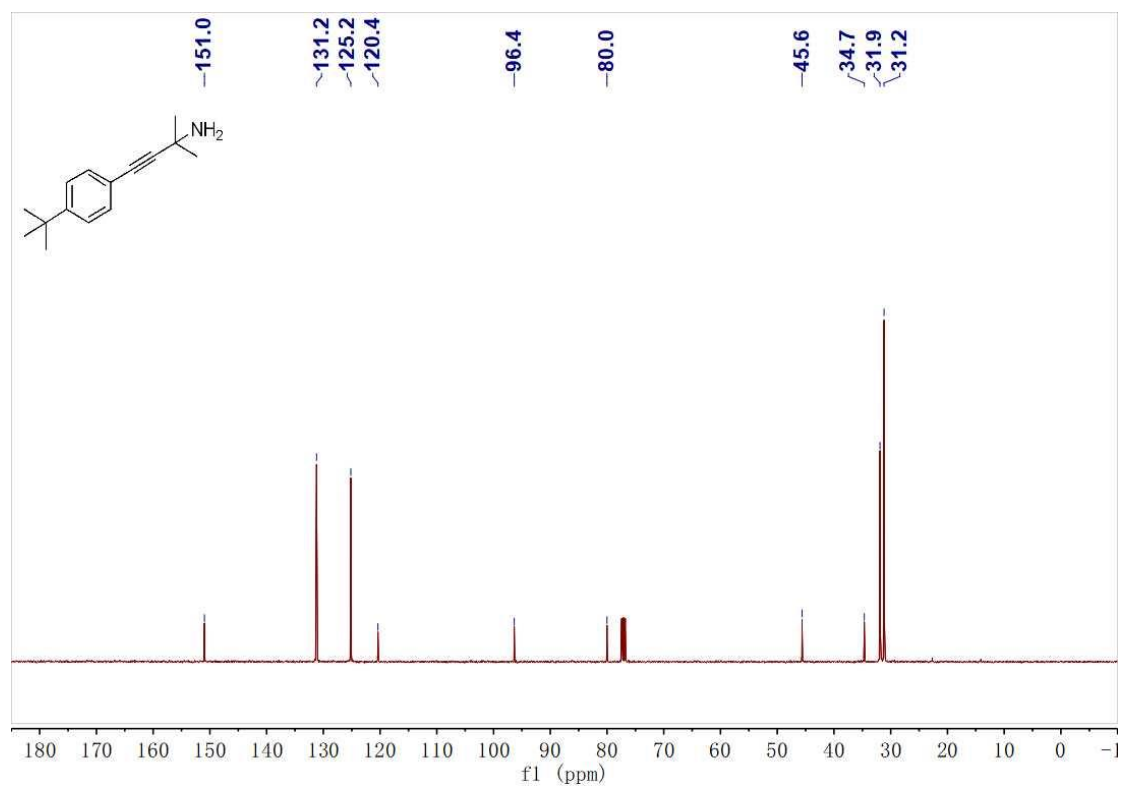

# 1af

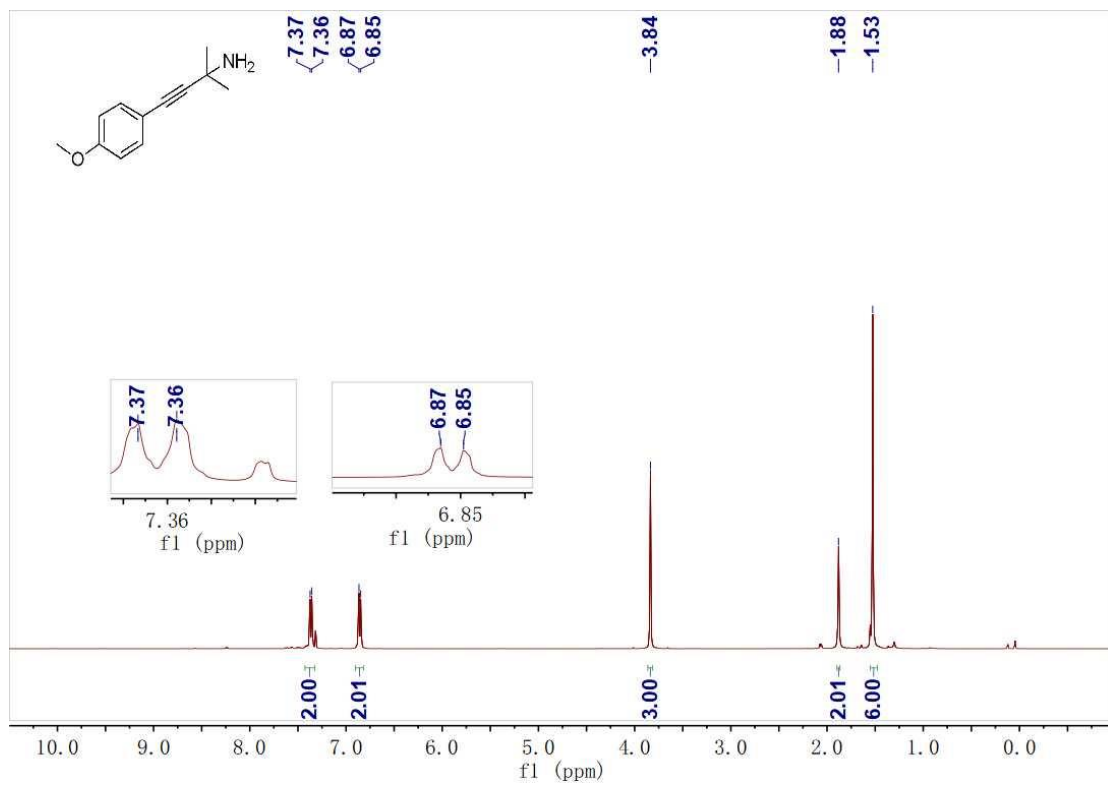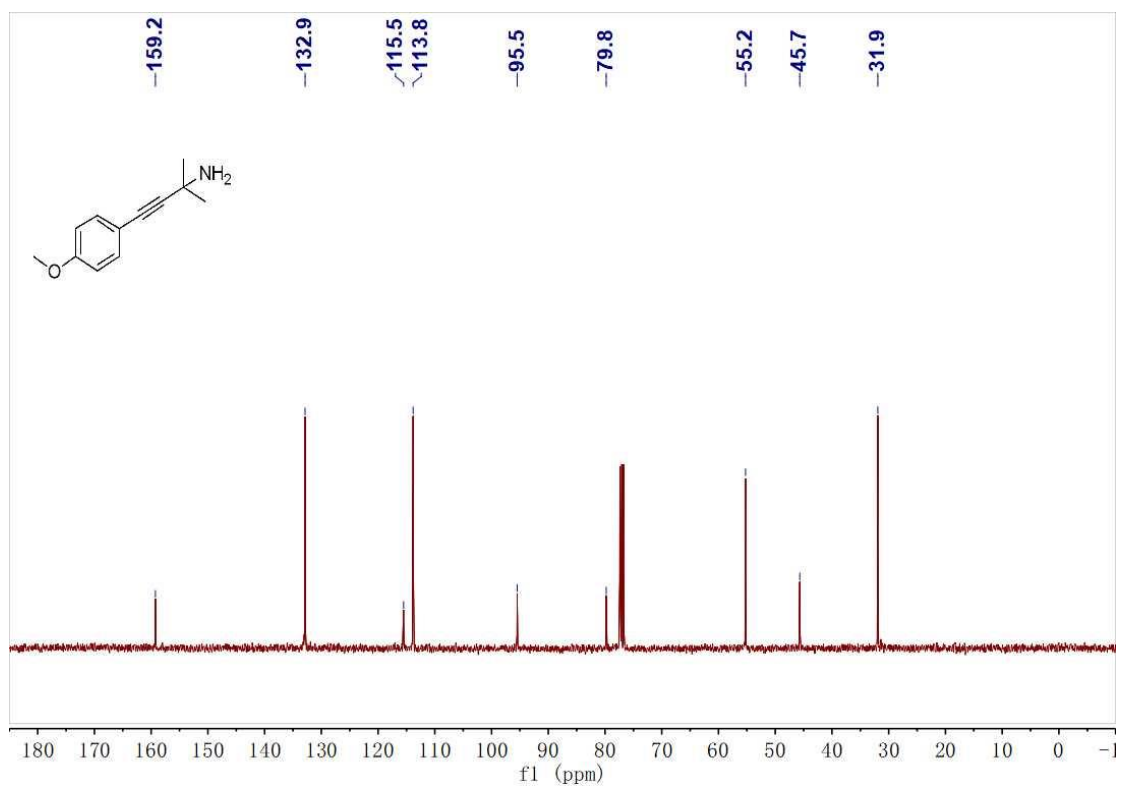

# 1ag

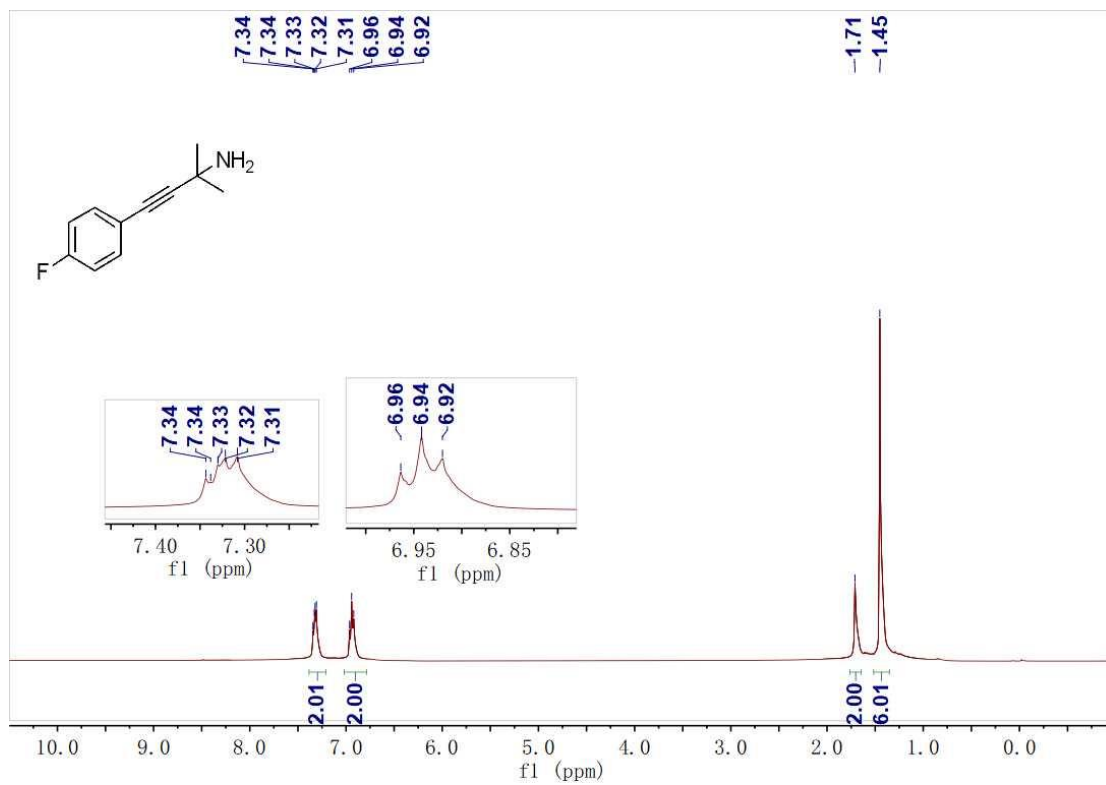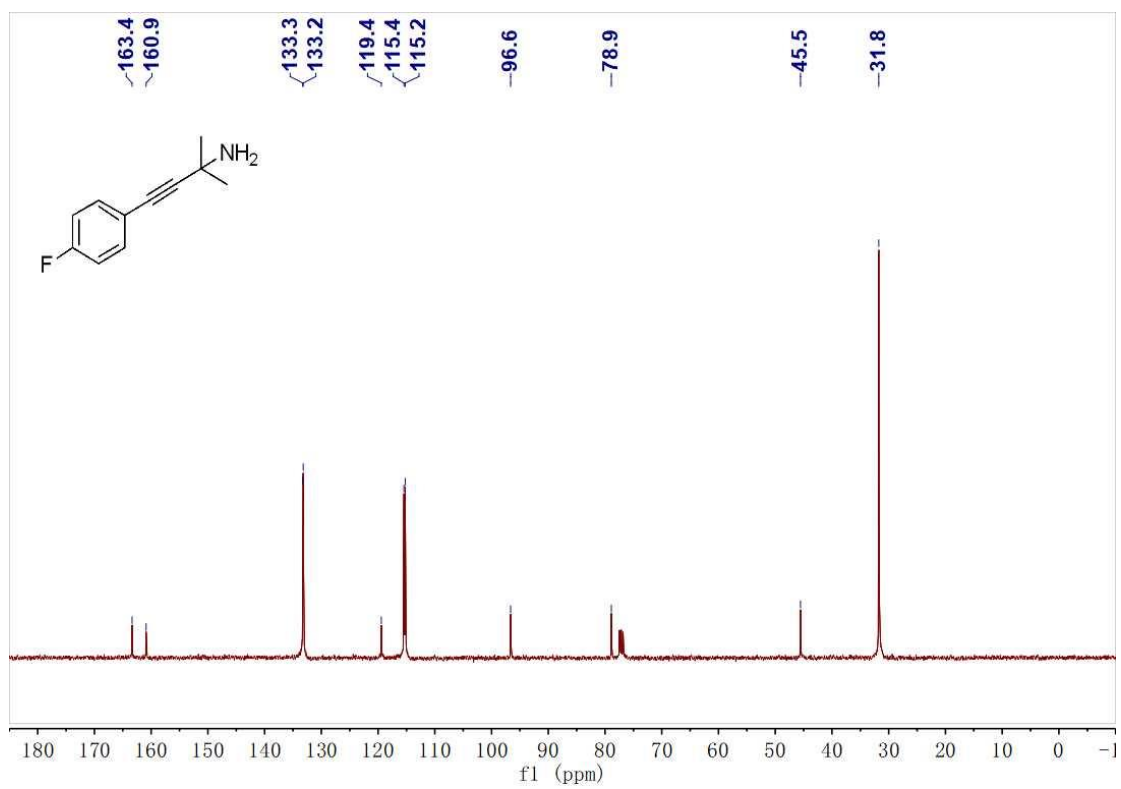

# 1ah

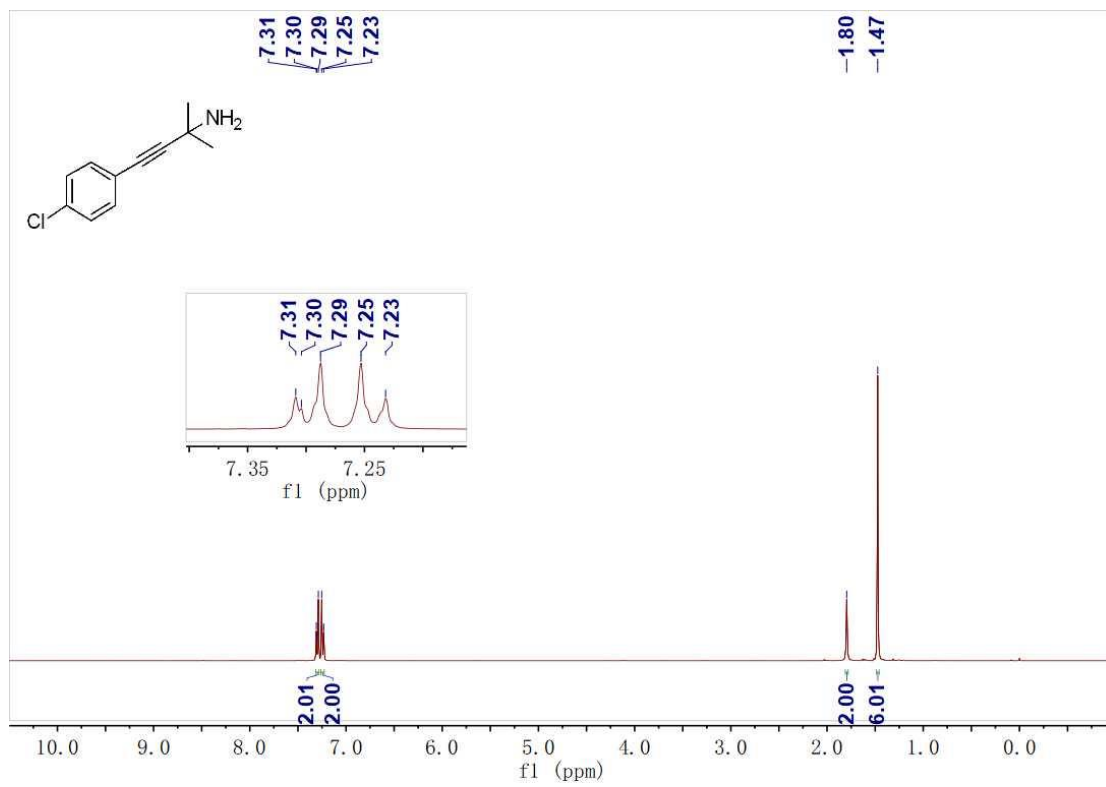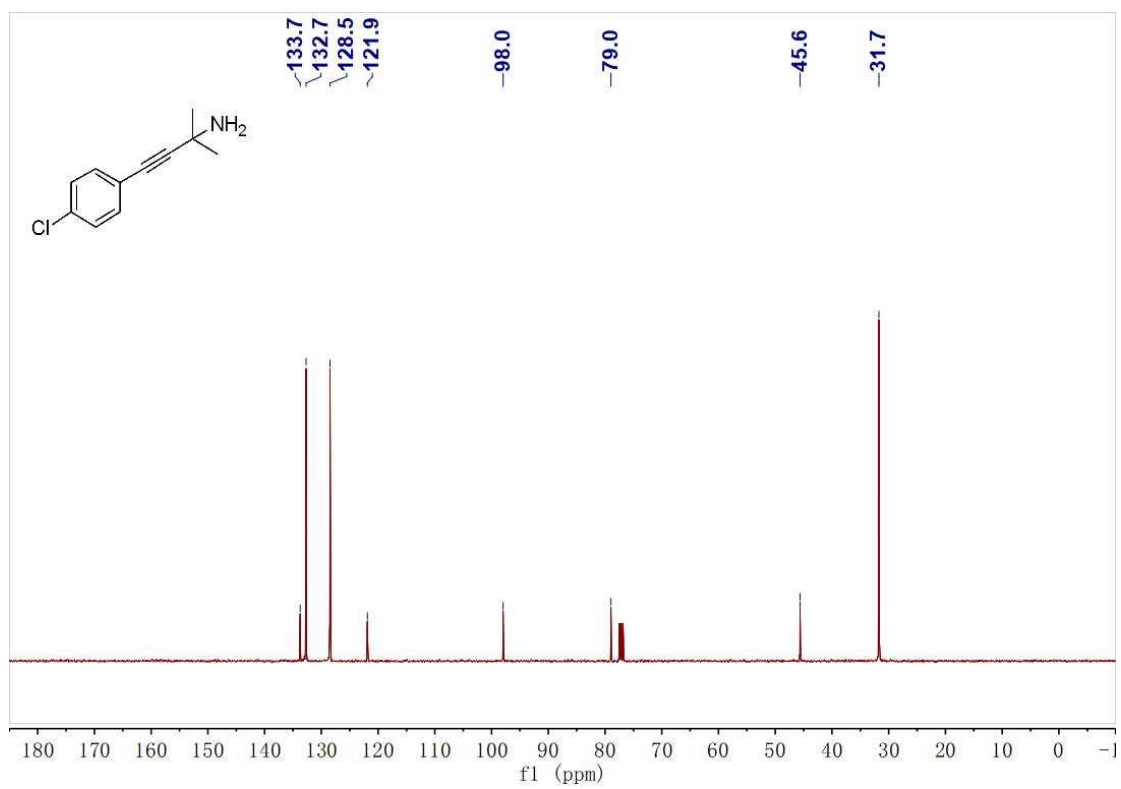

# 1ai

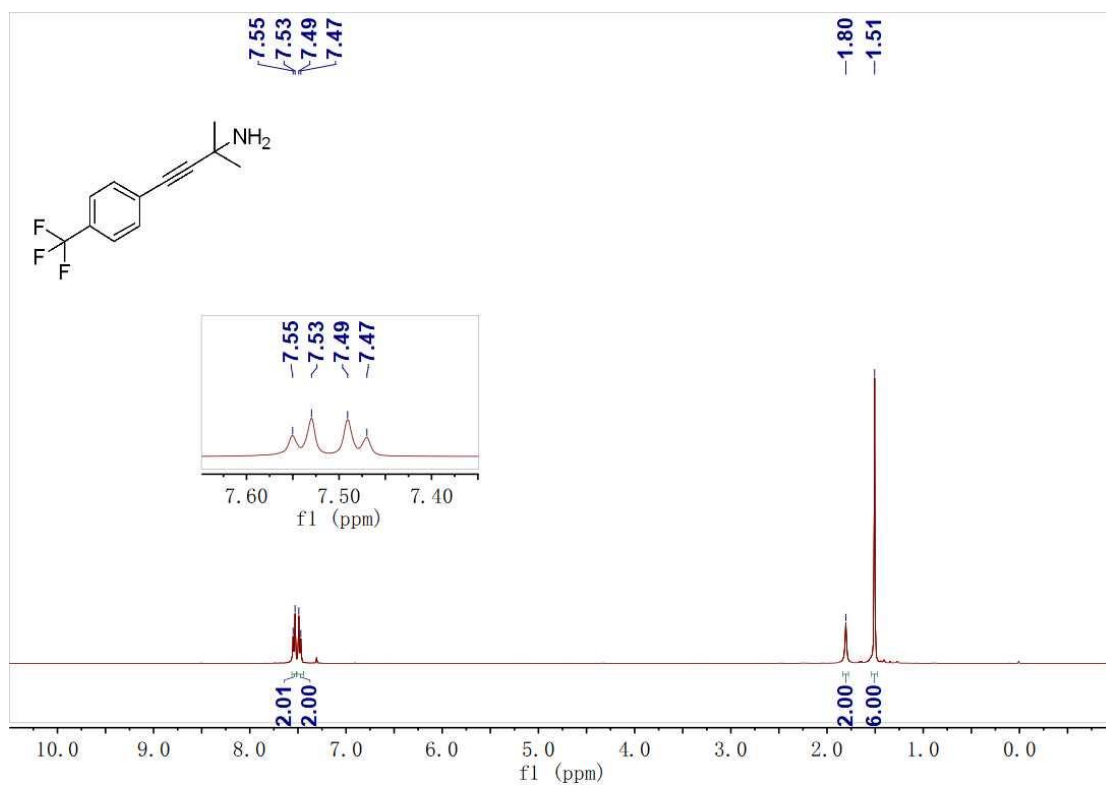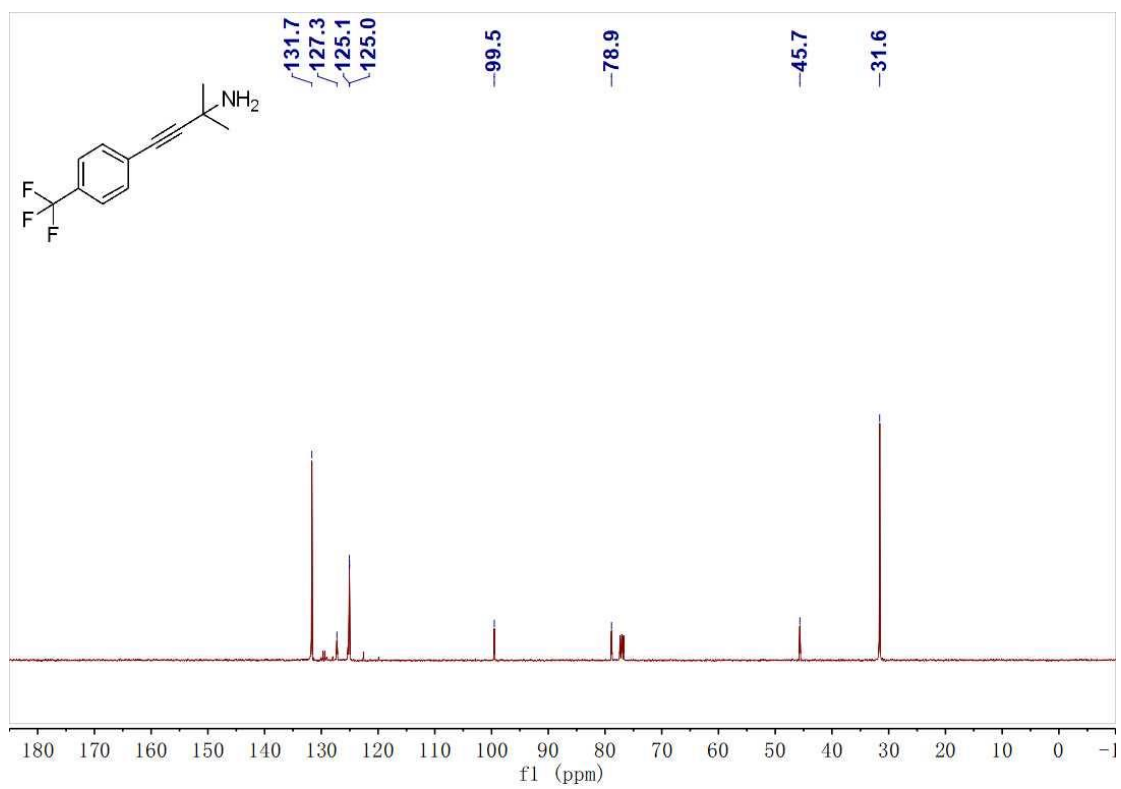

1aj

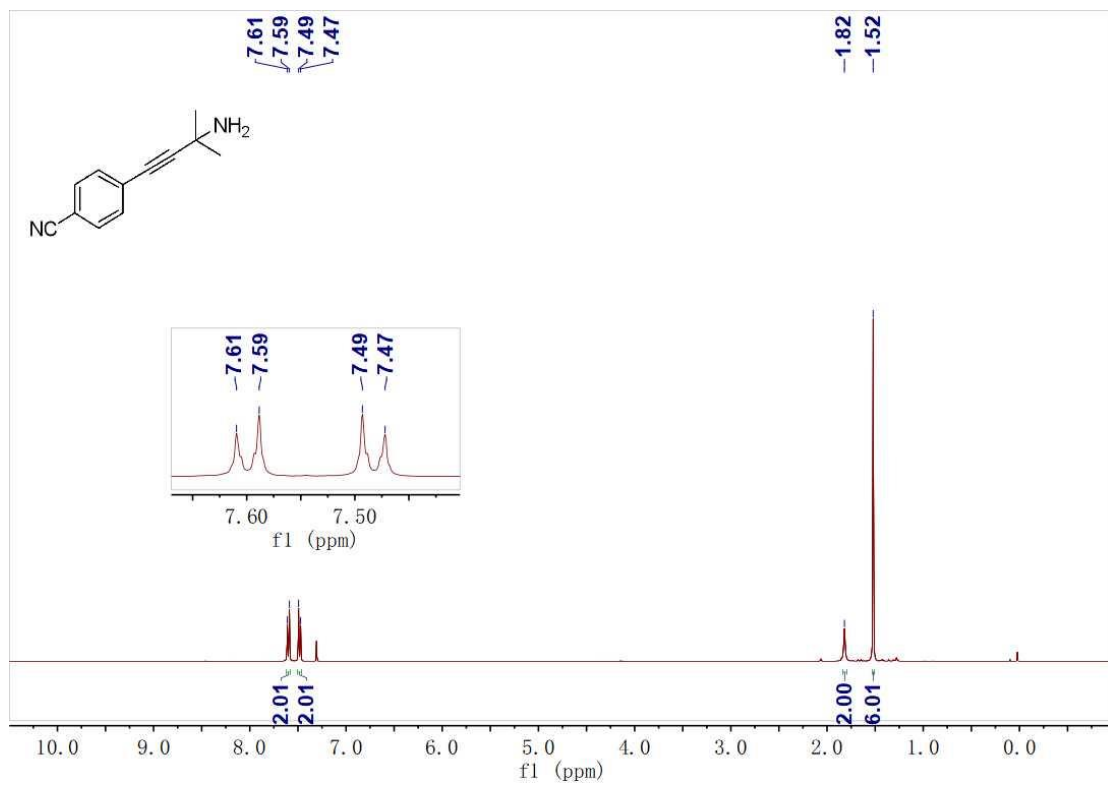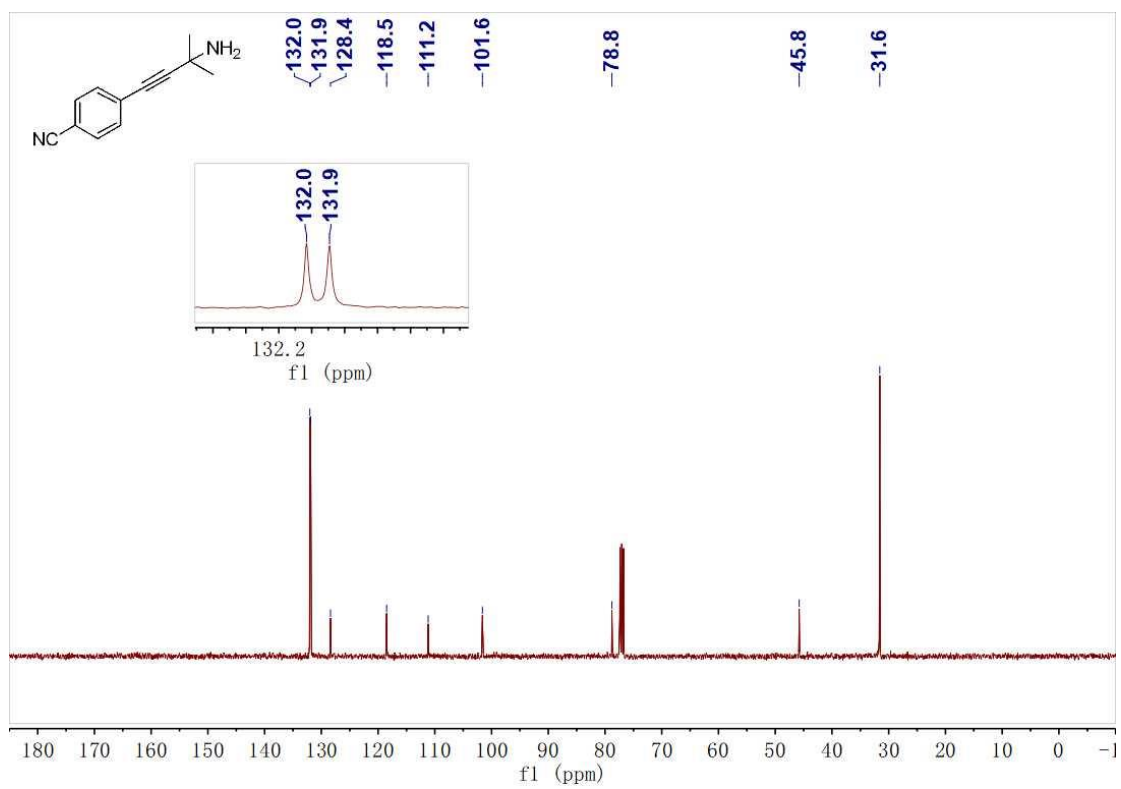



# 1ak

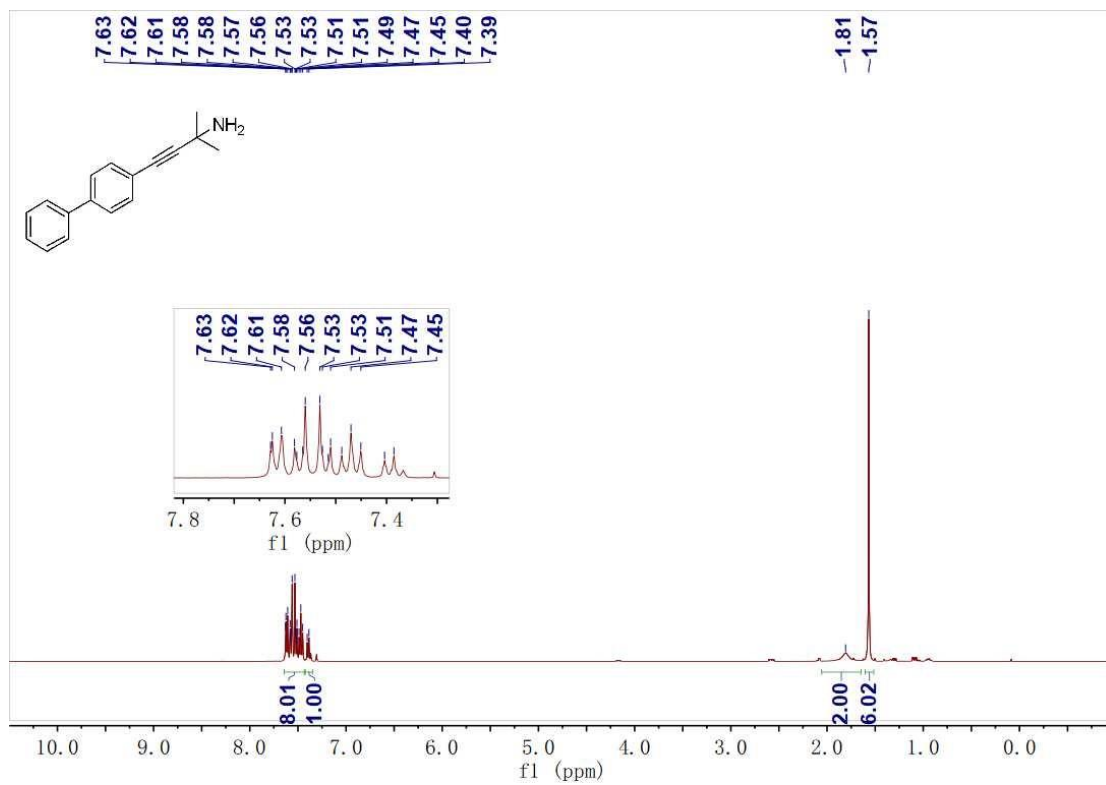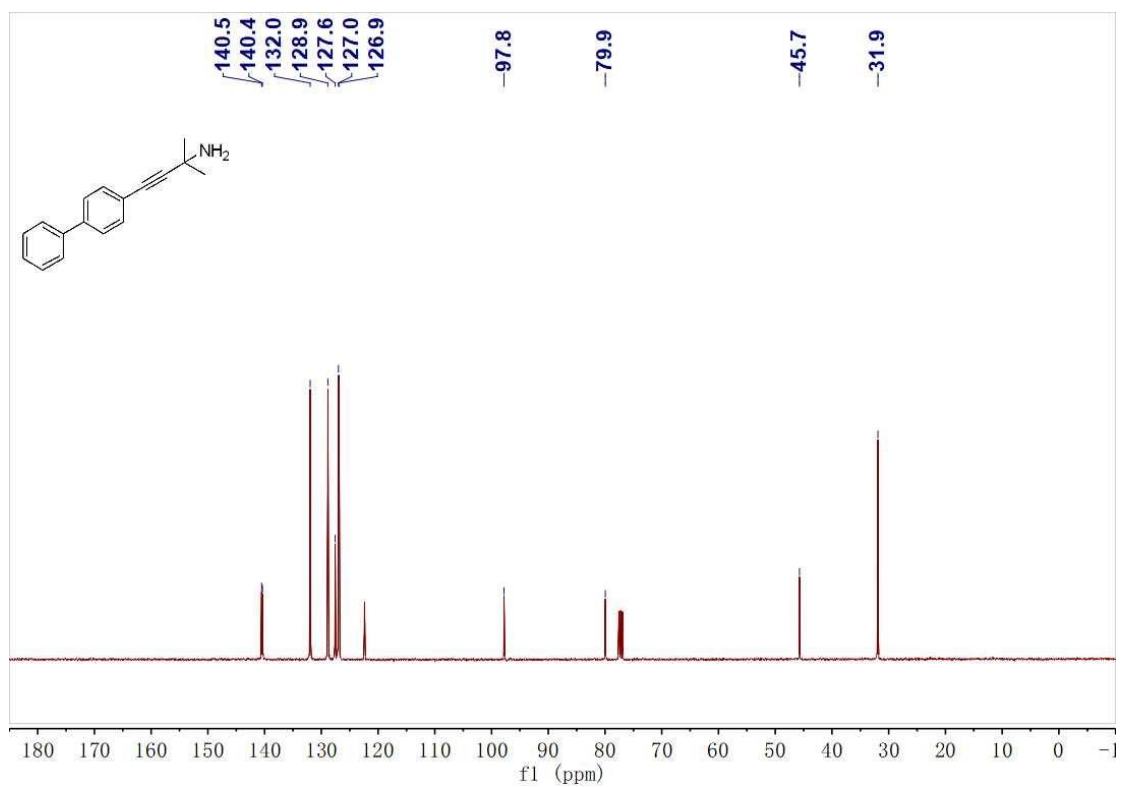

# 1a1

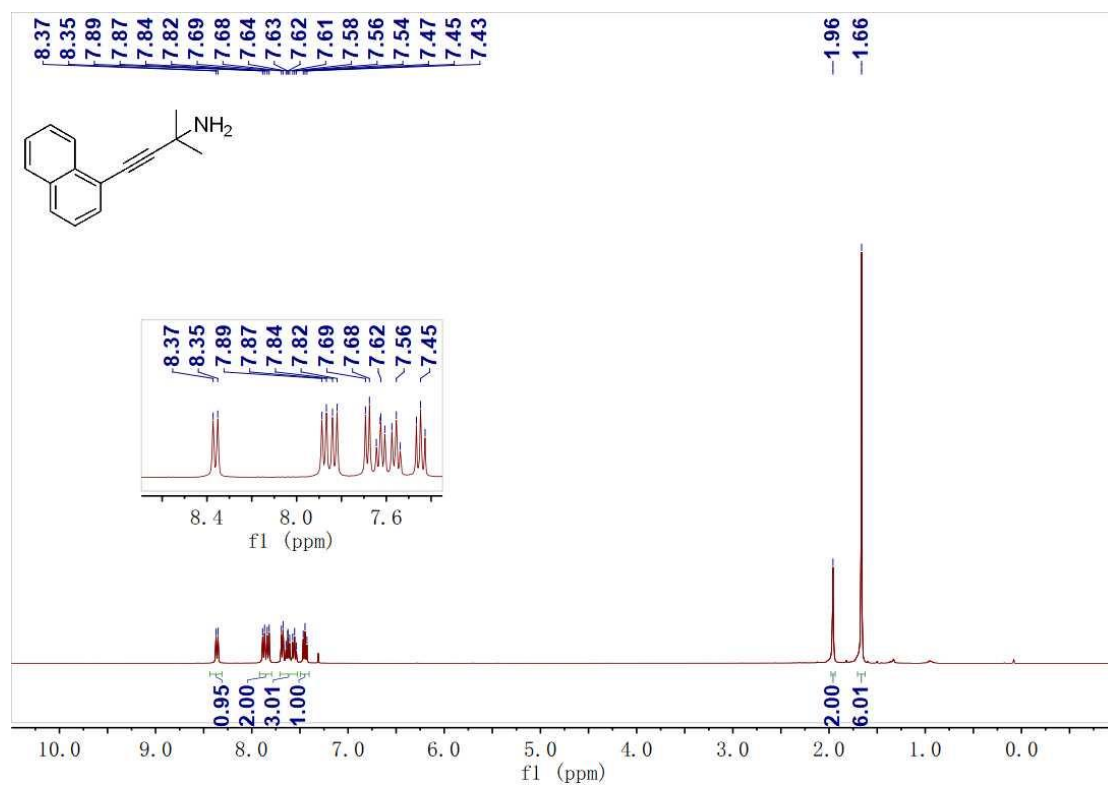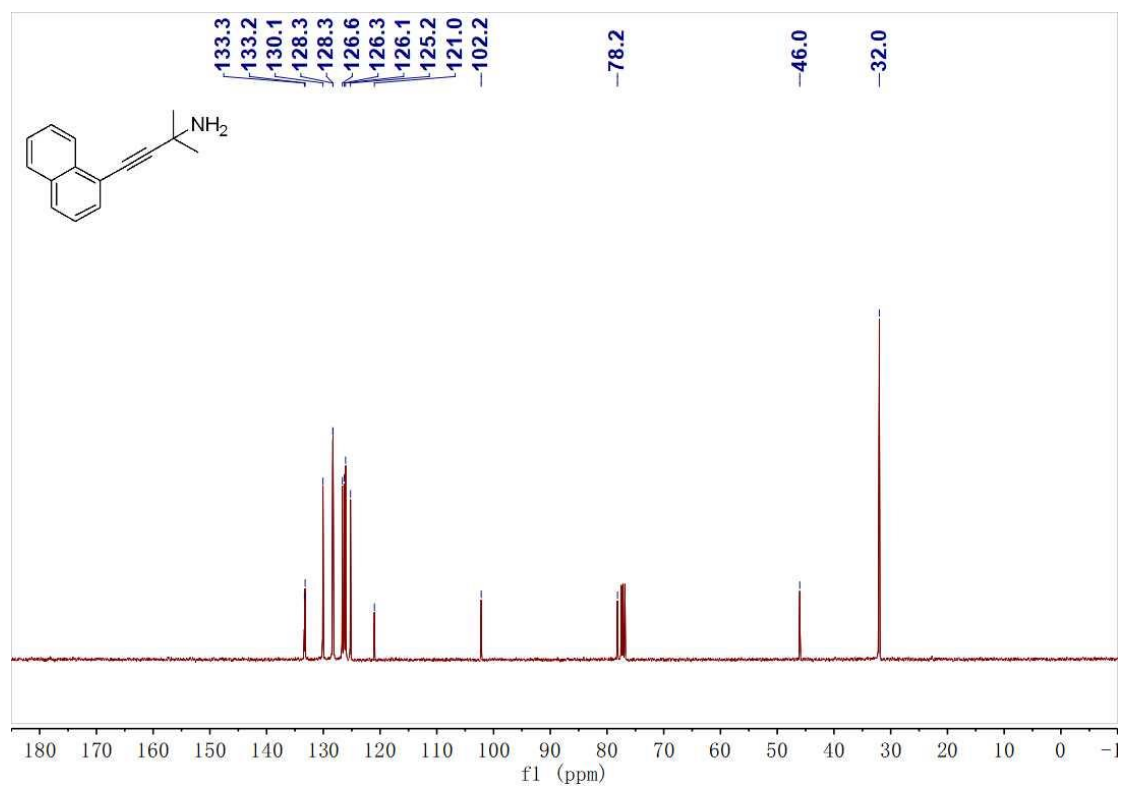

# 1am

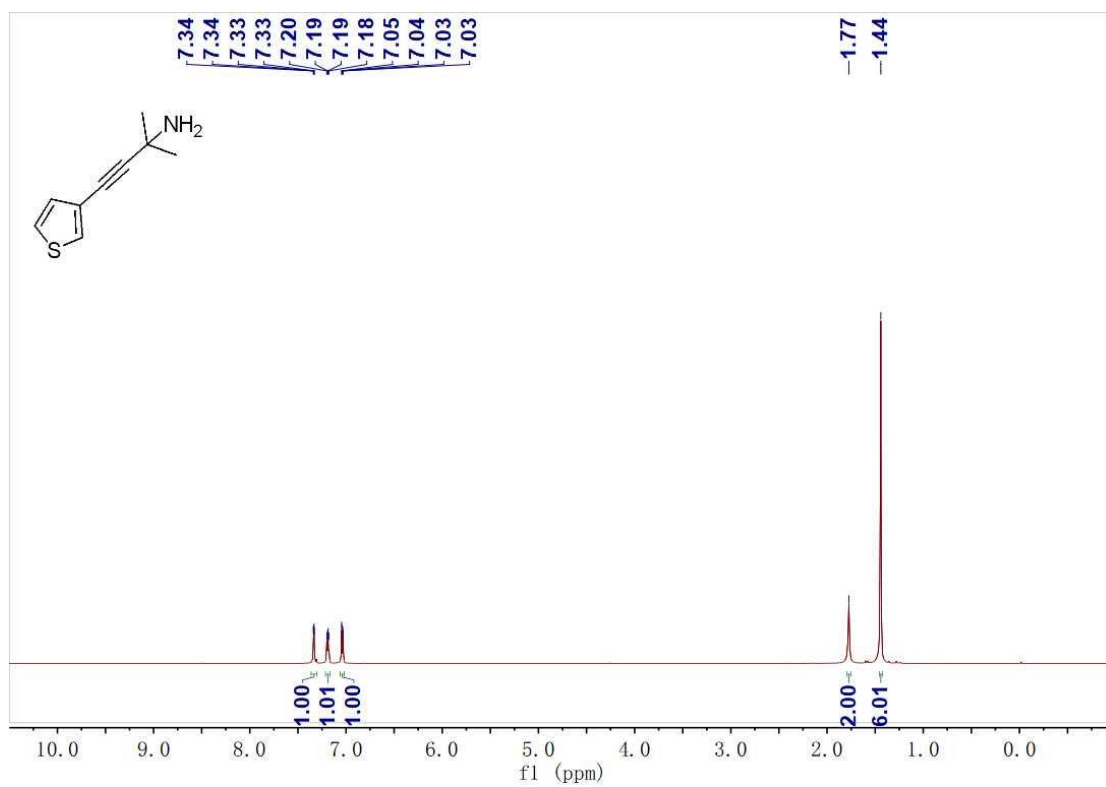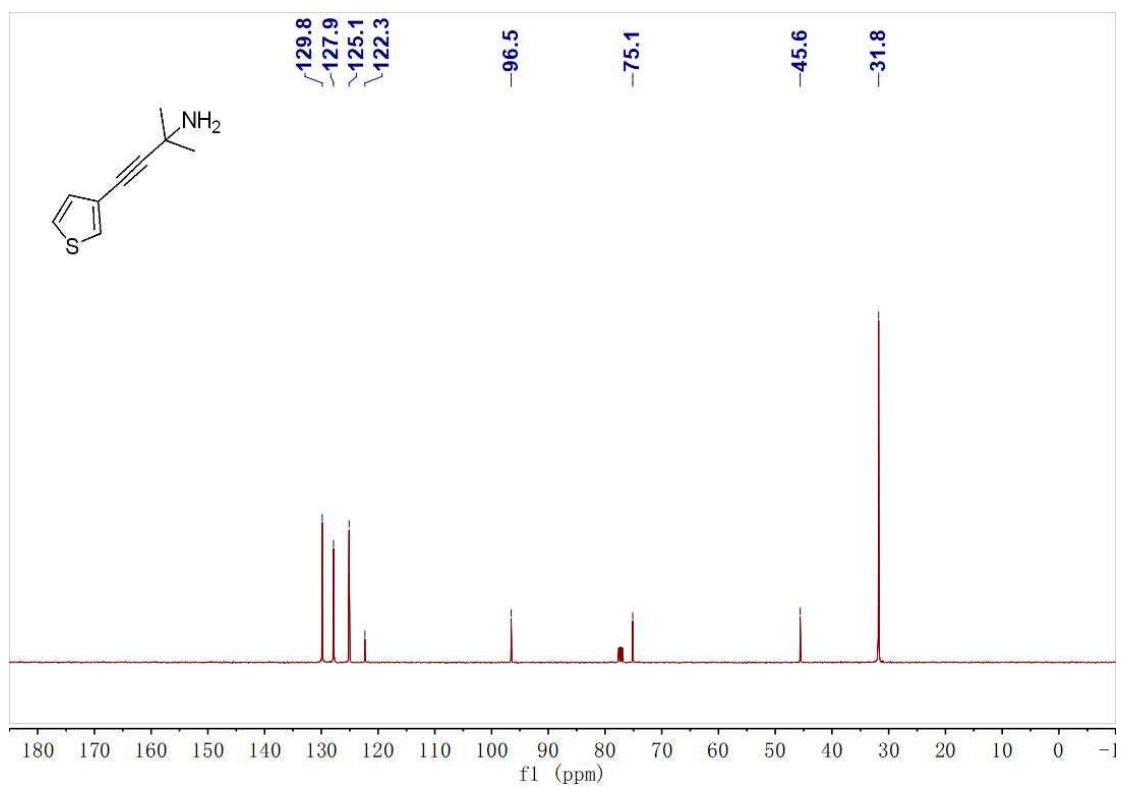

# 1ap

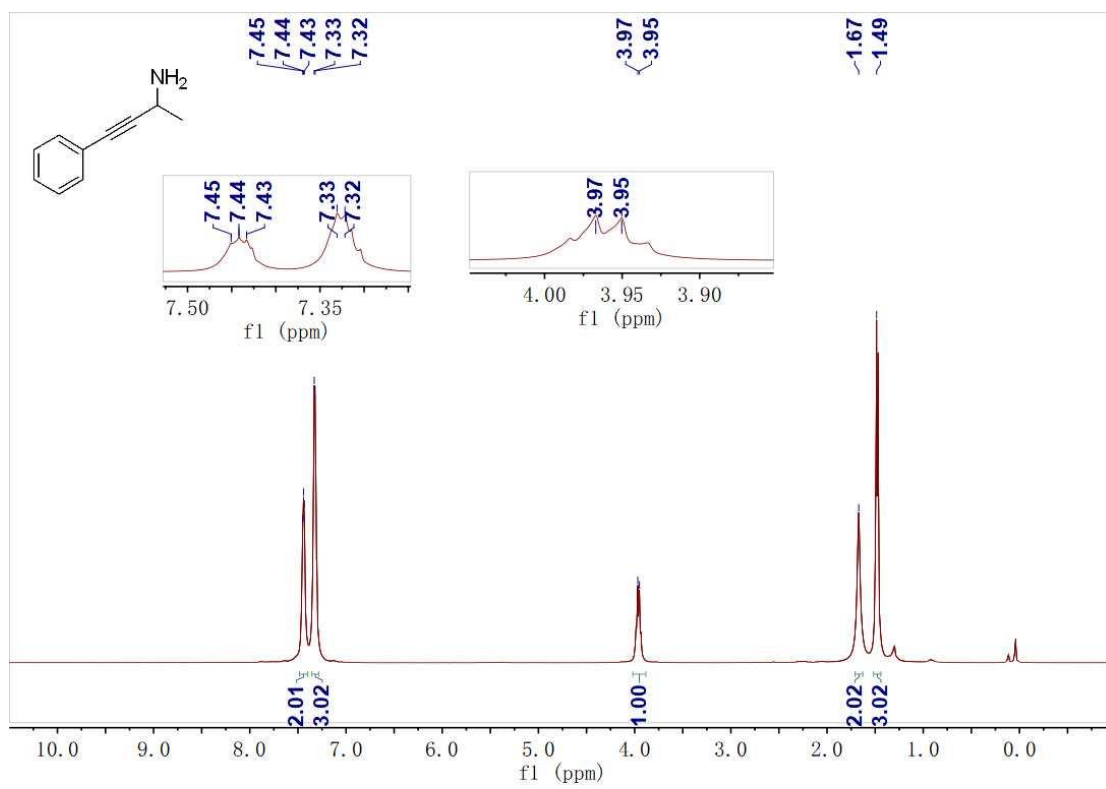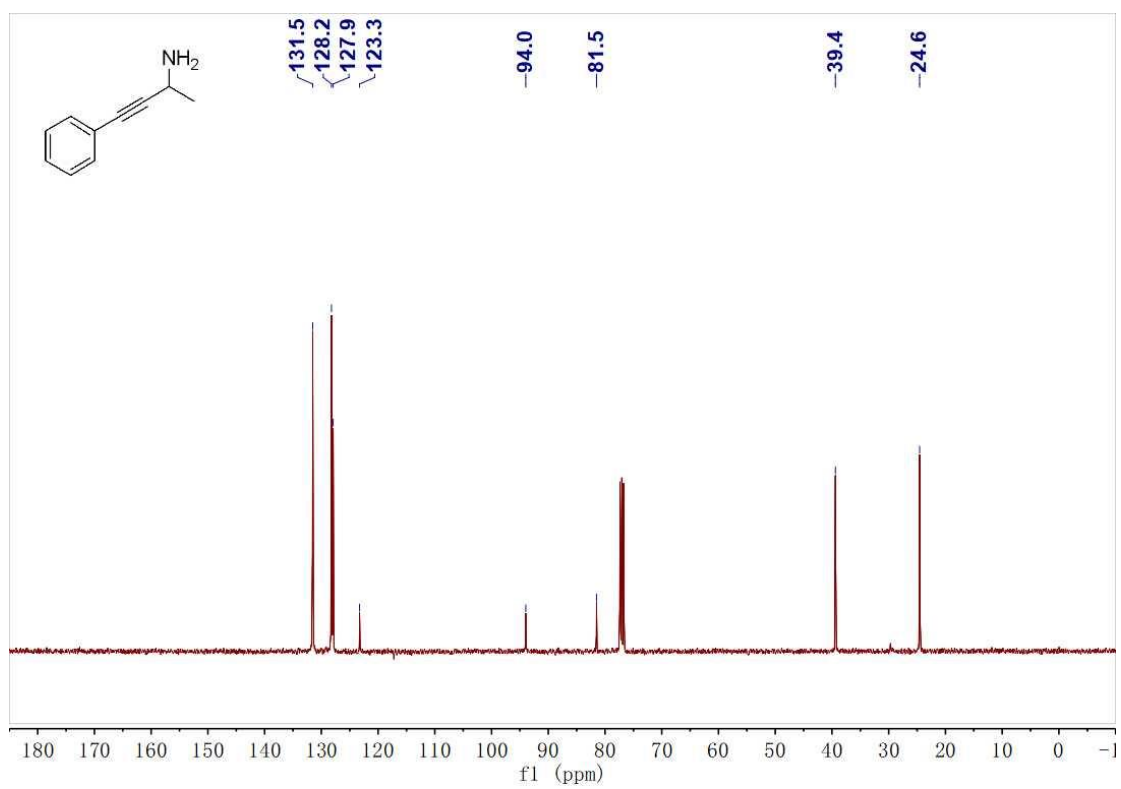

# 1aq

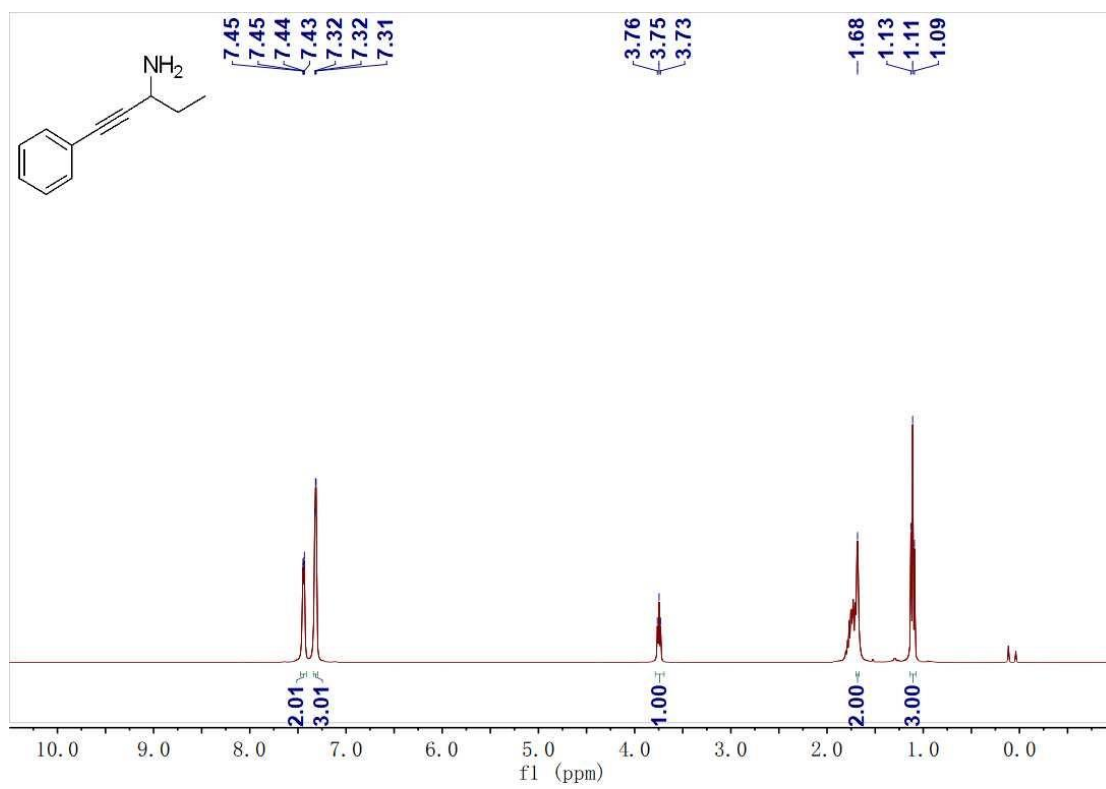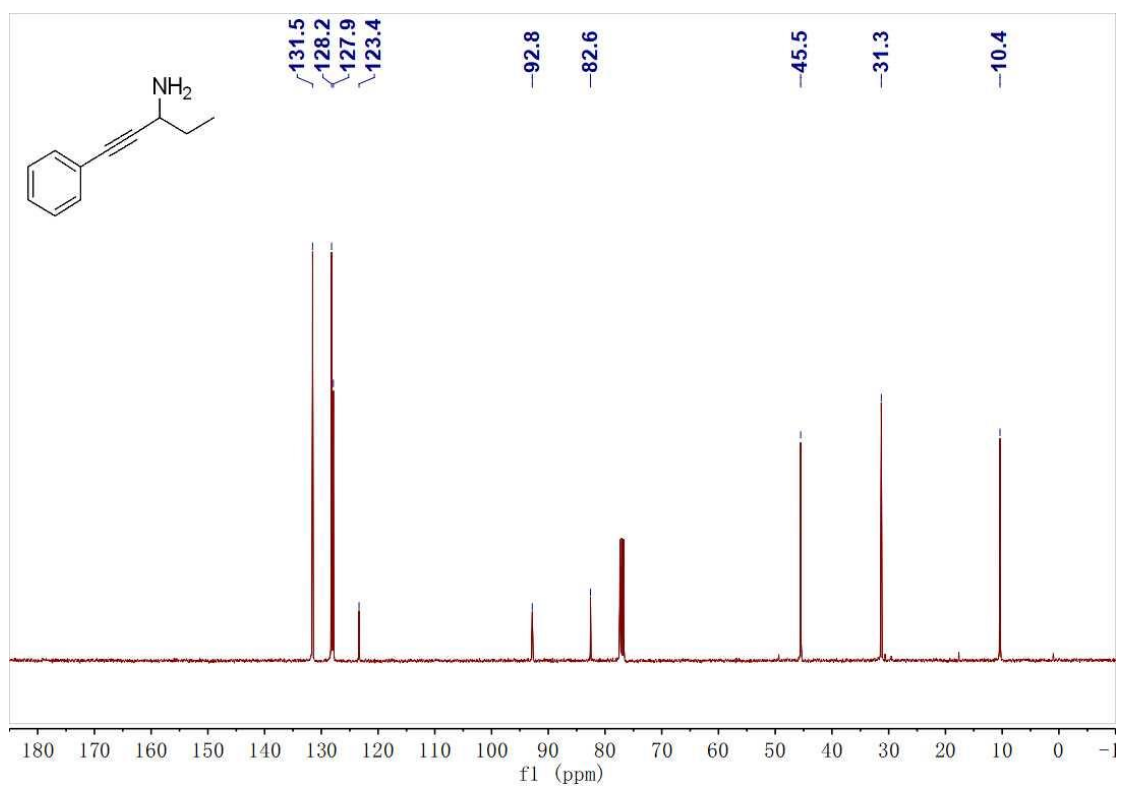

## 10. Spectra of Products

2a

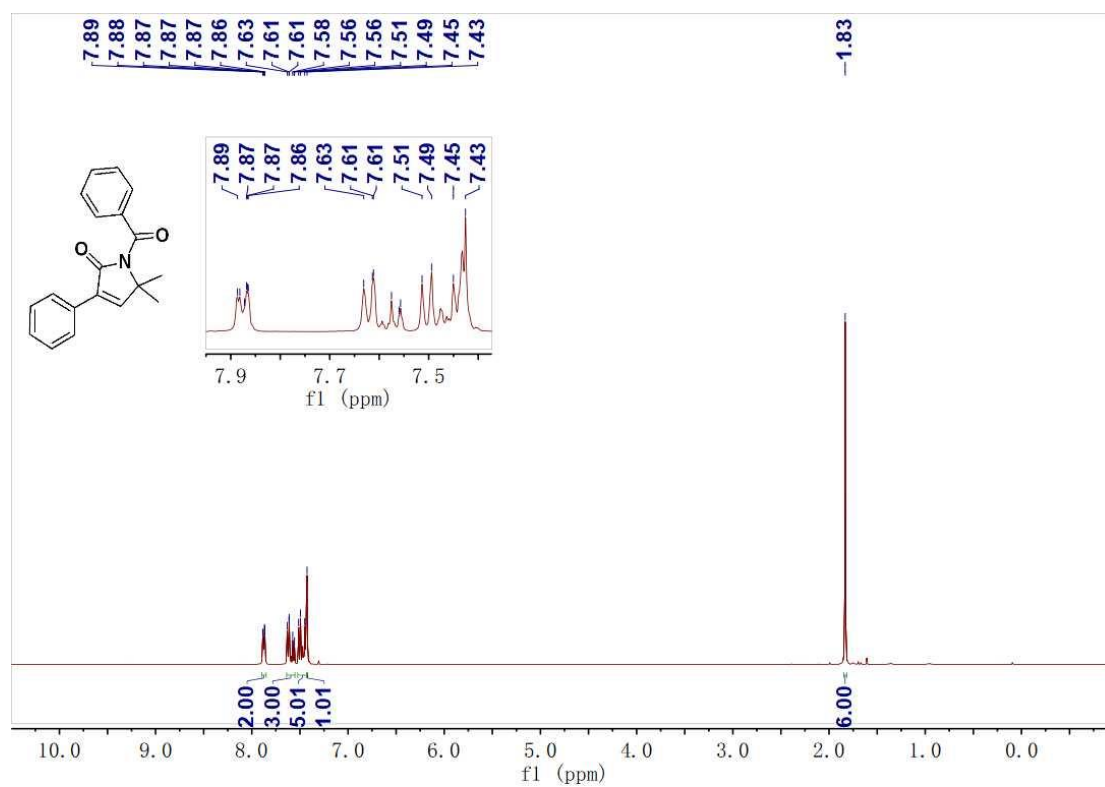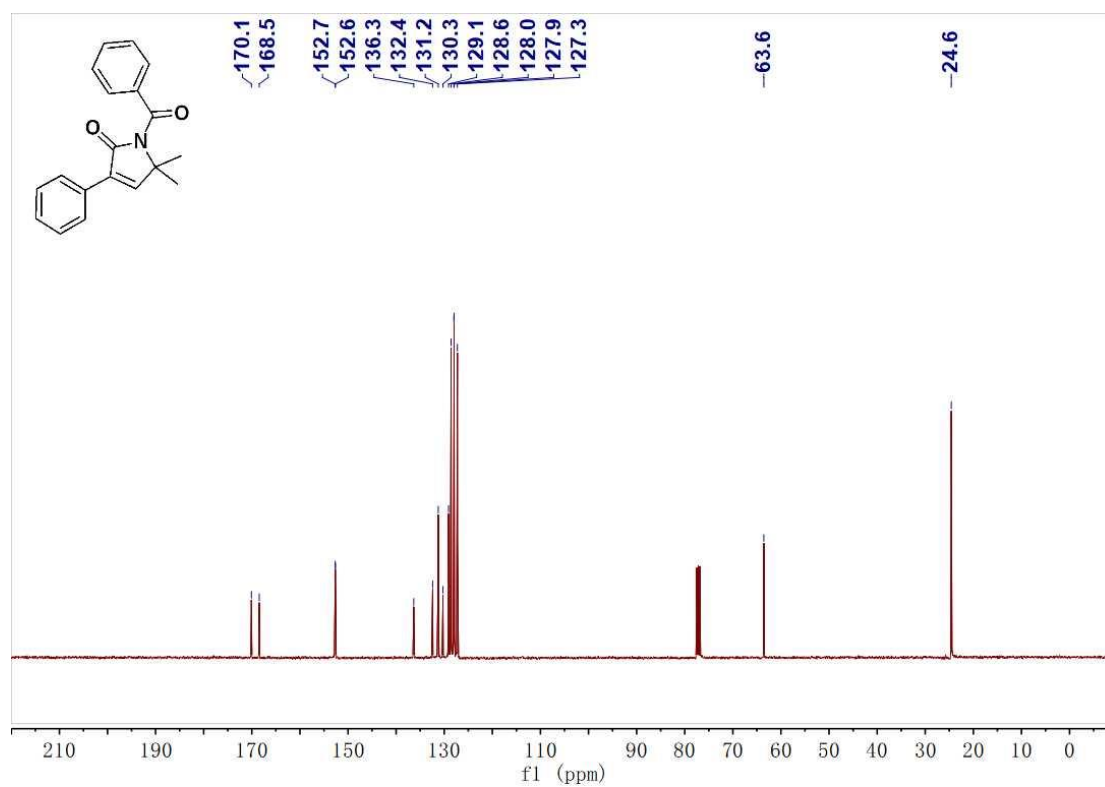

2b

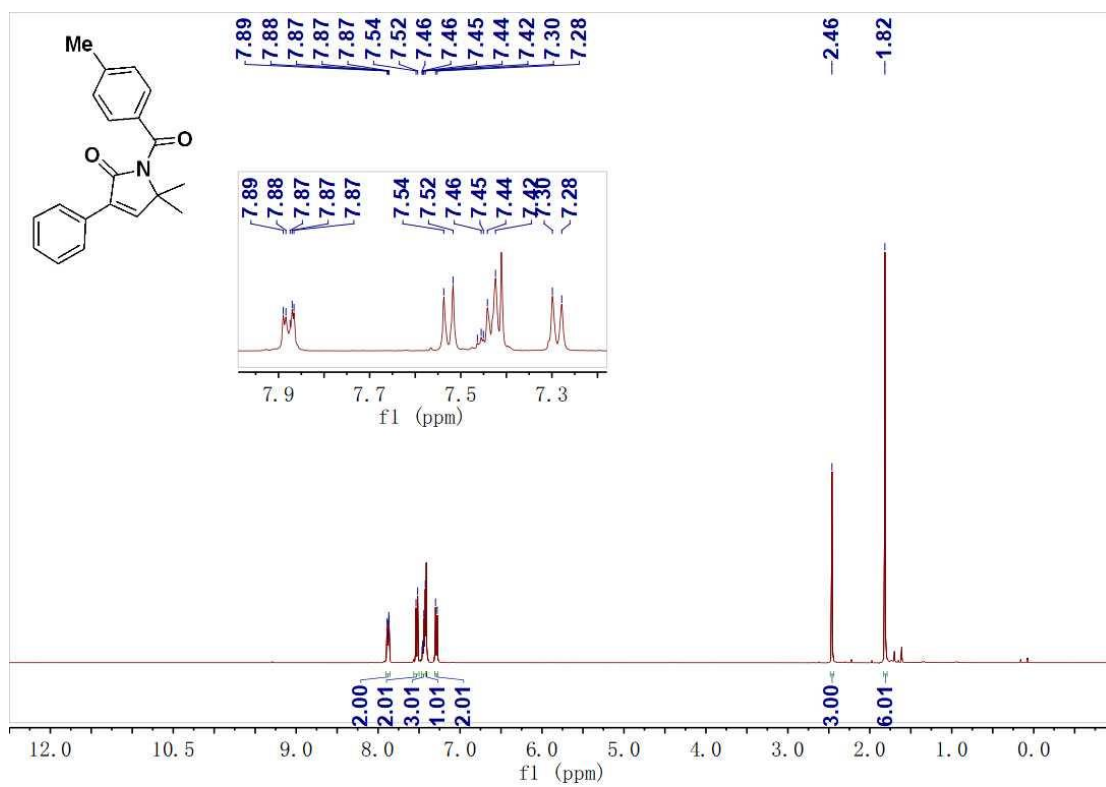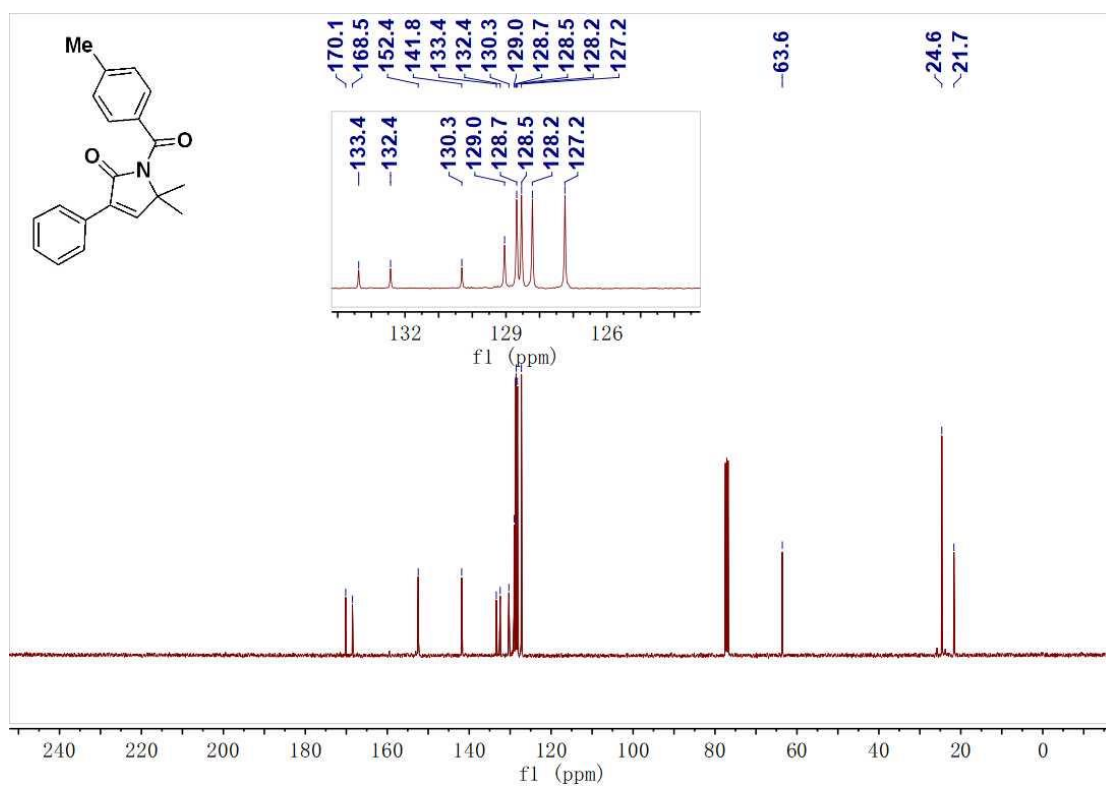

2c

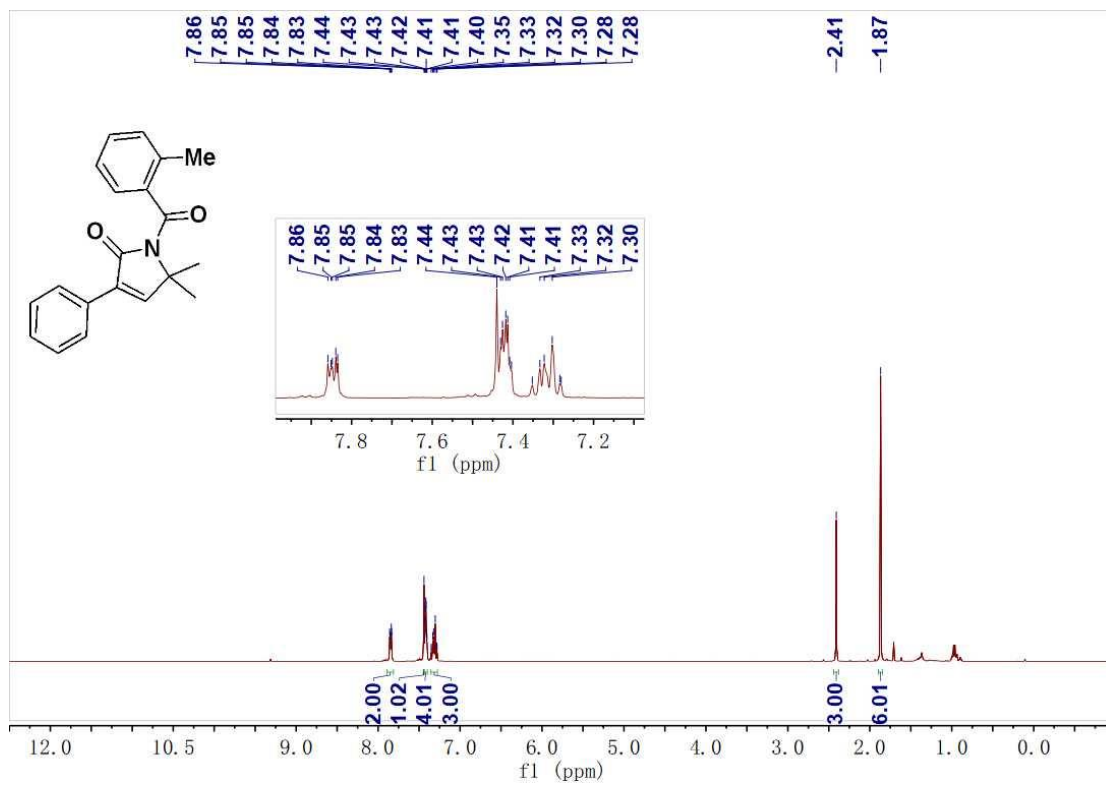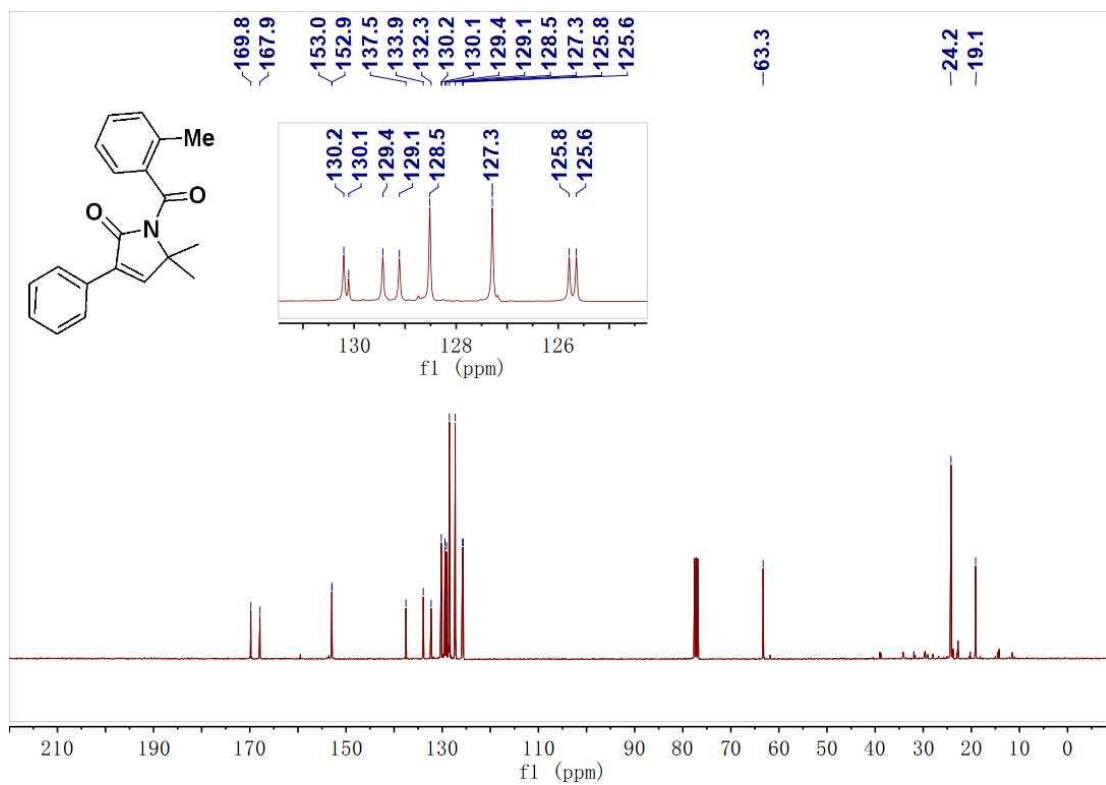



2d

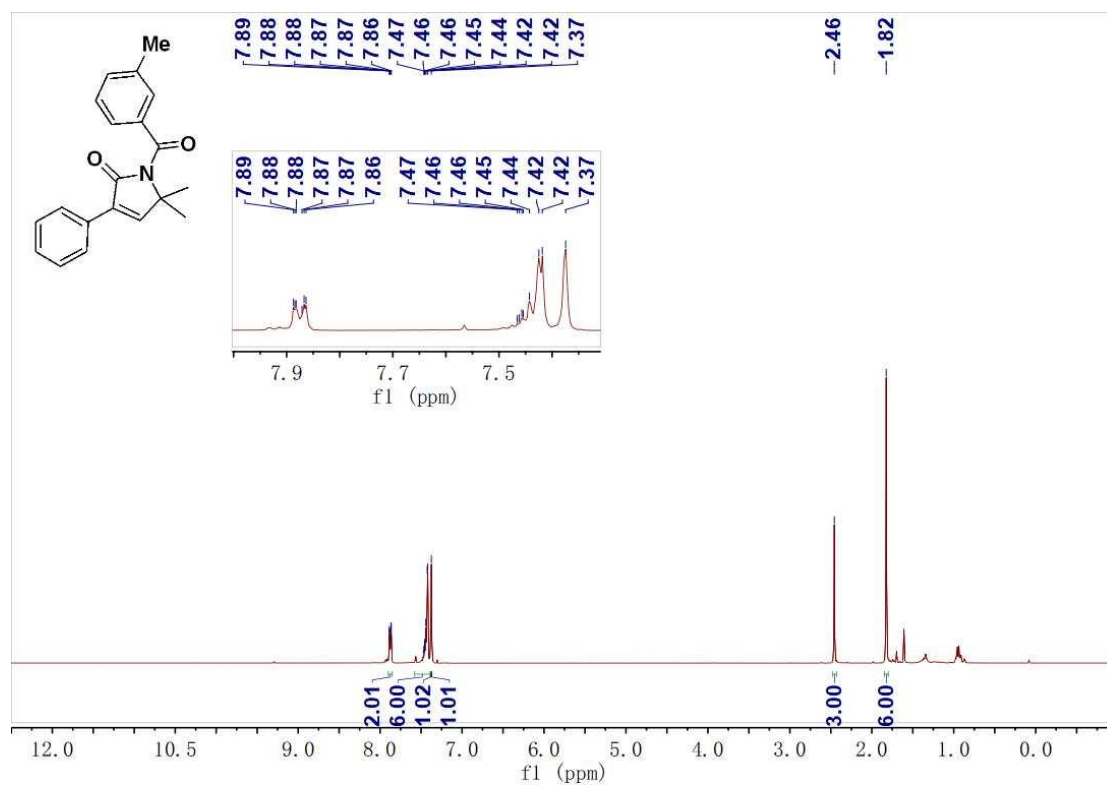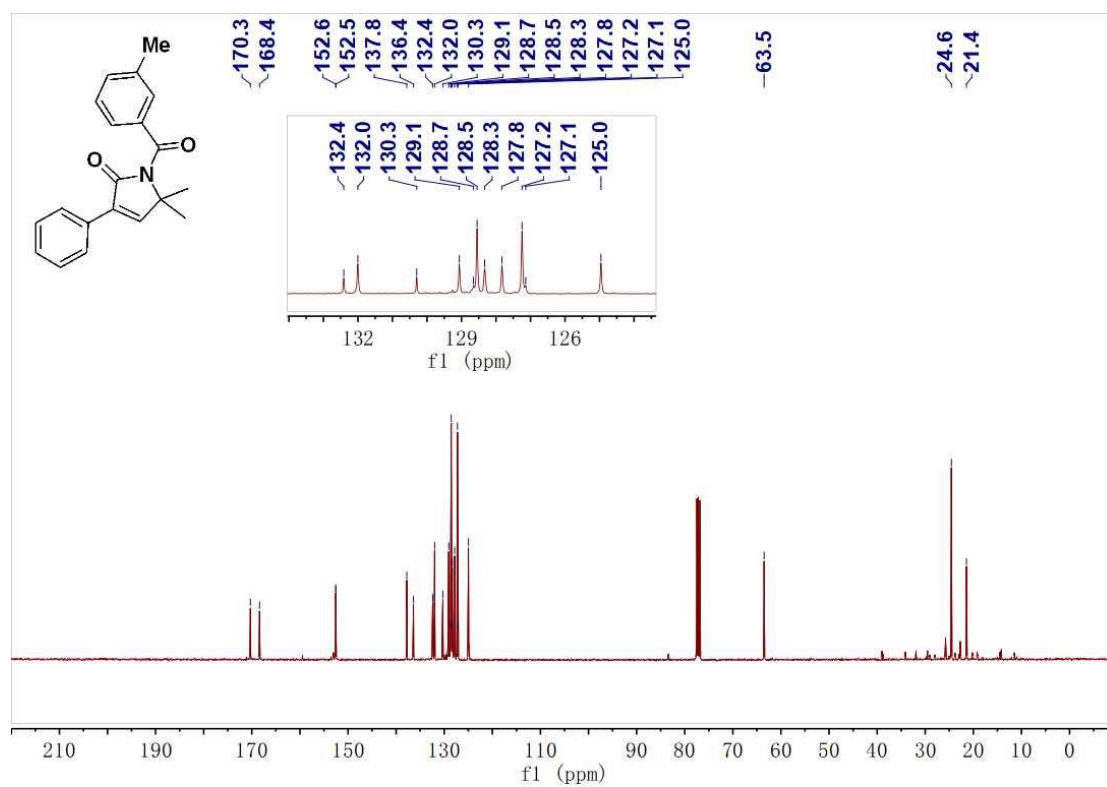

2e

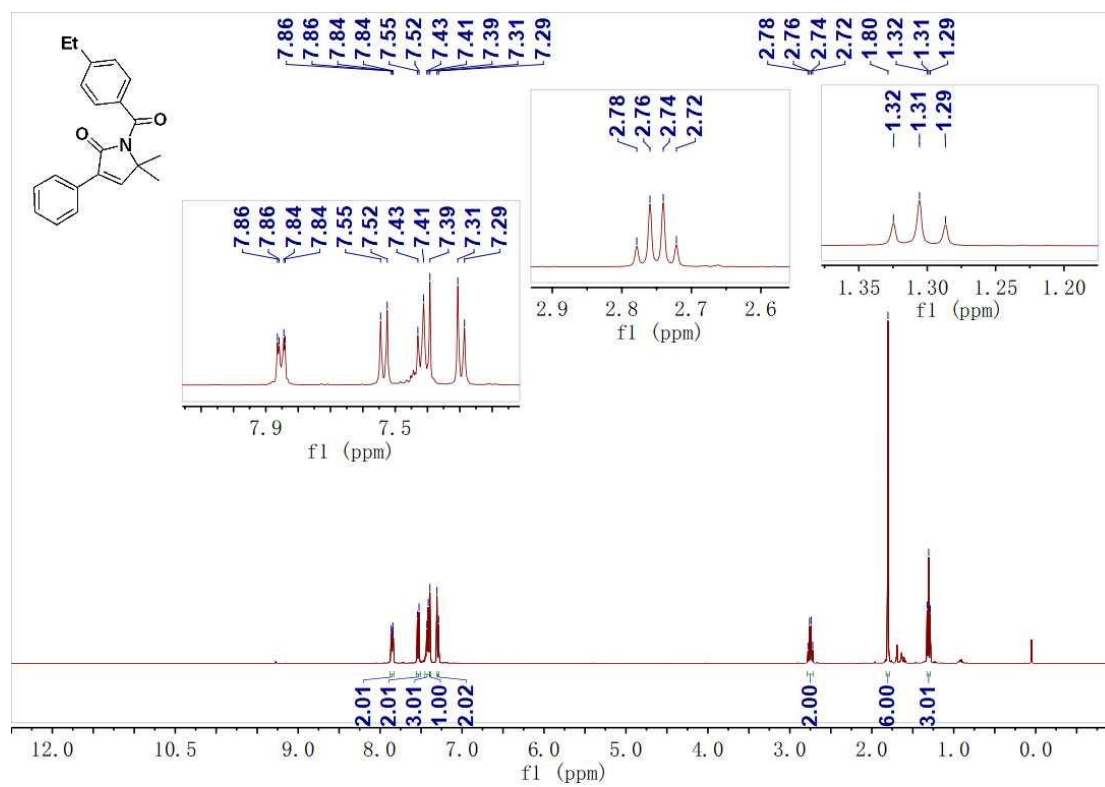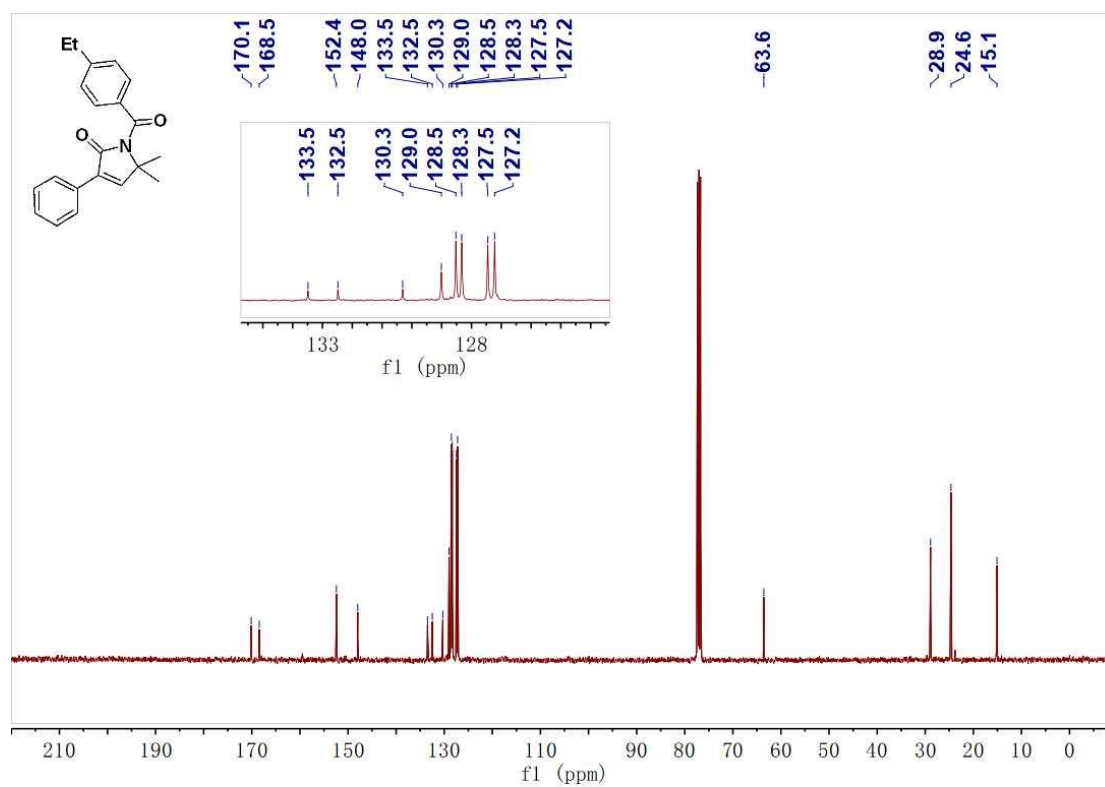

2f

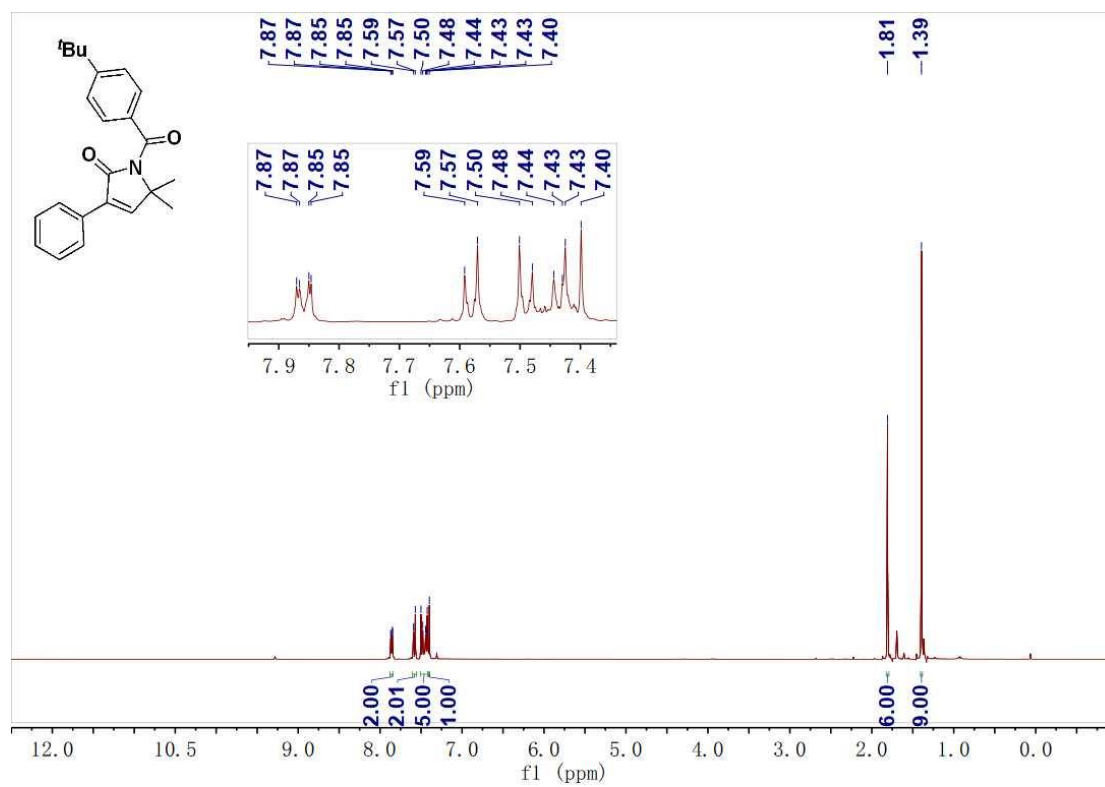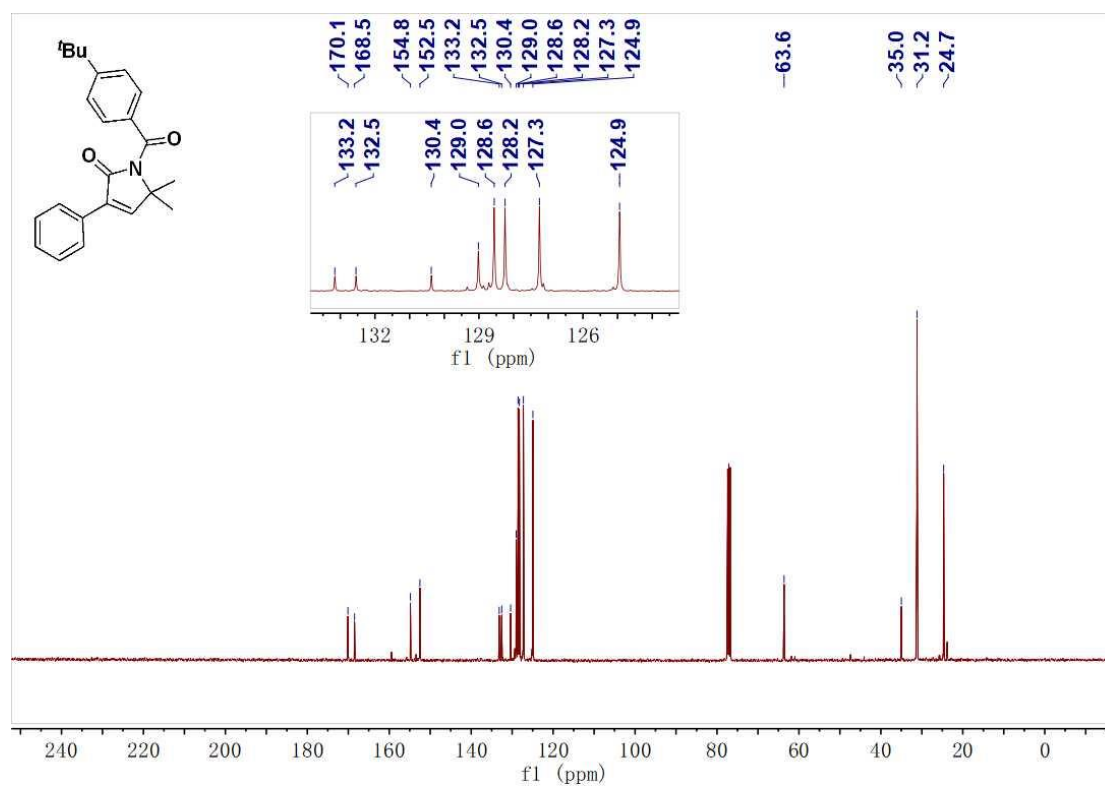

# 2g

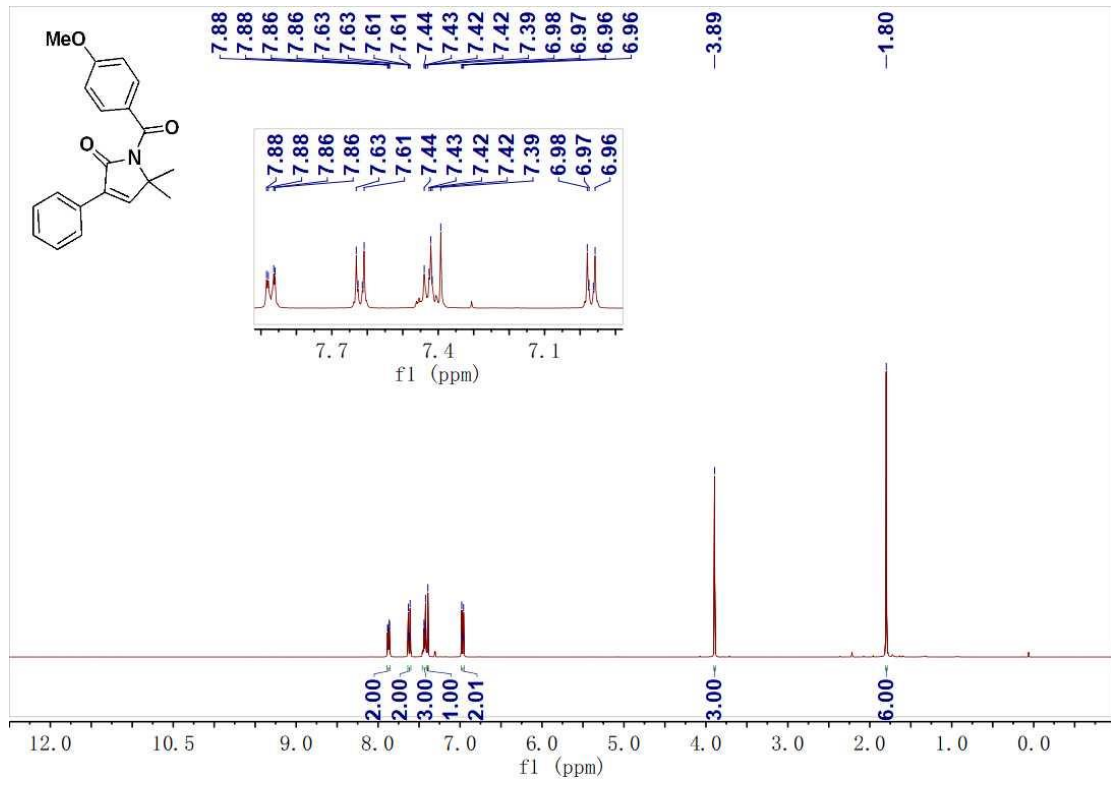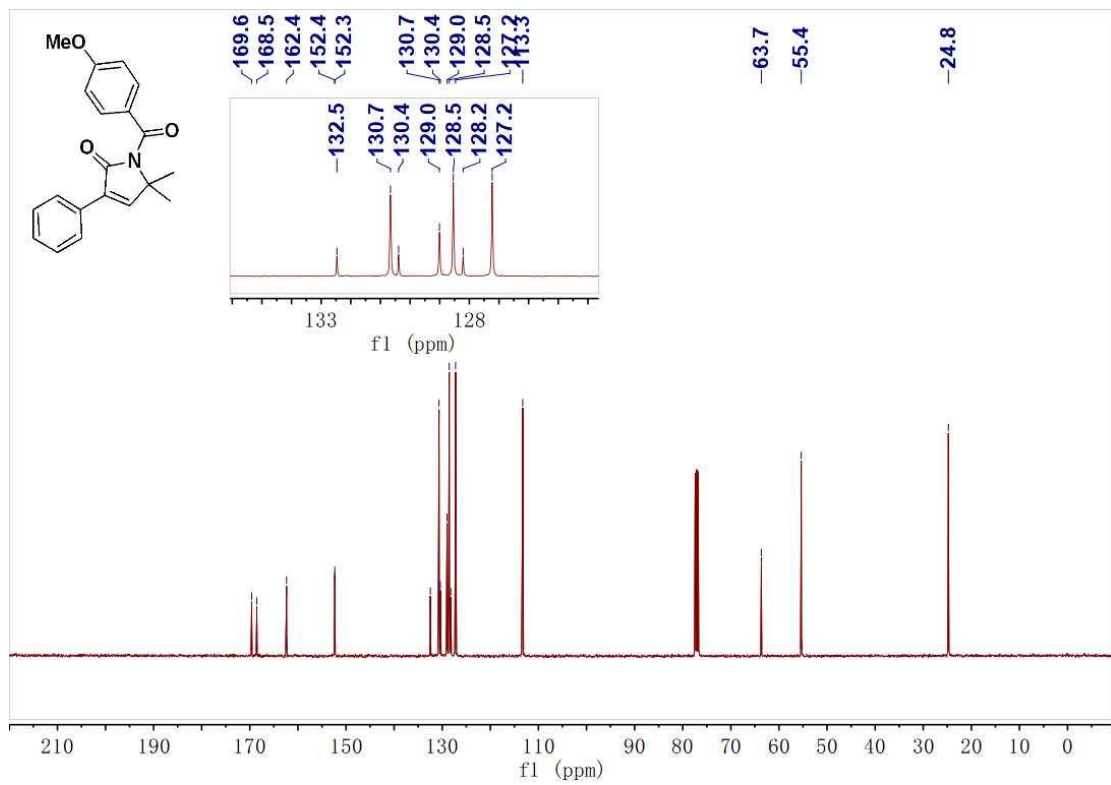

## 2h

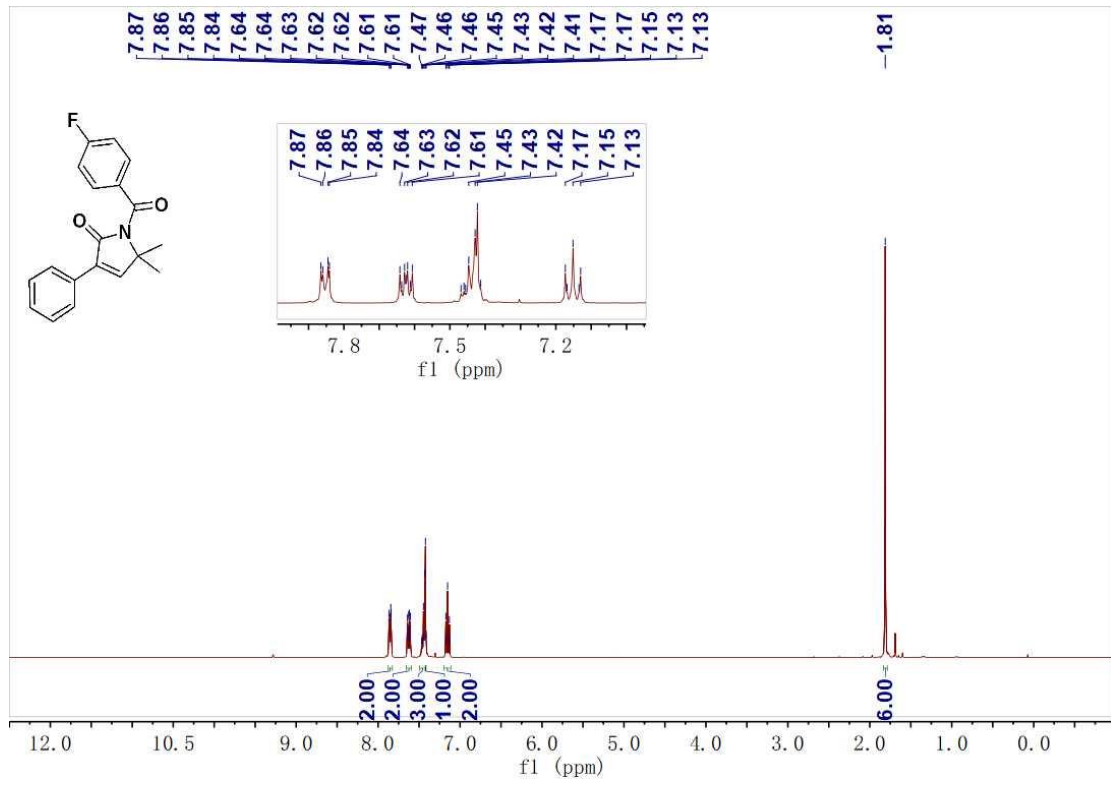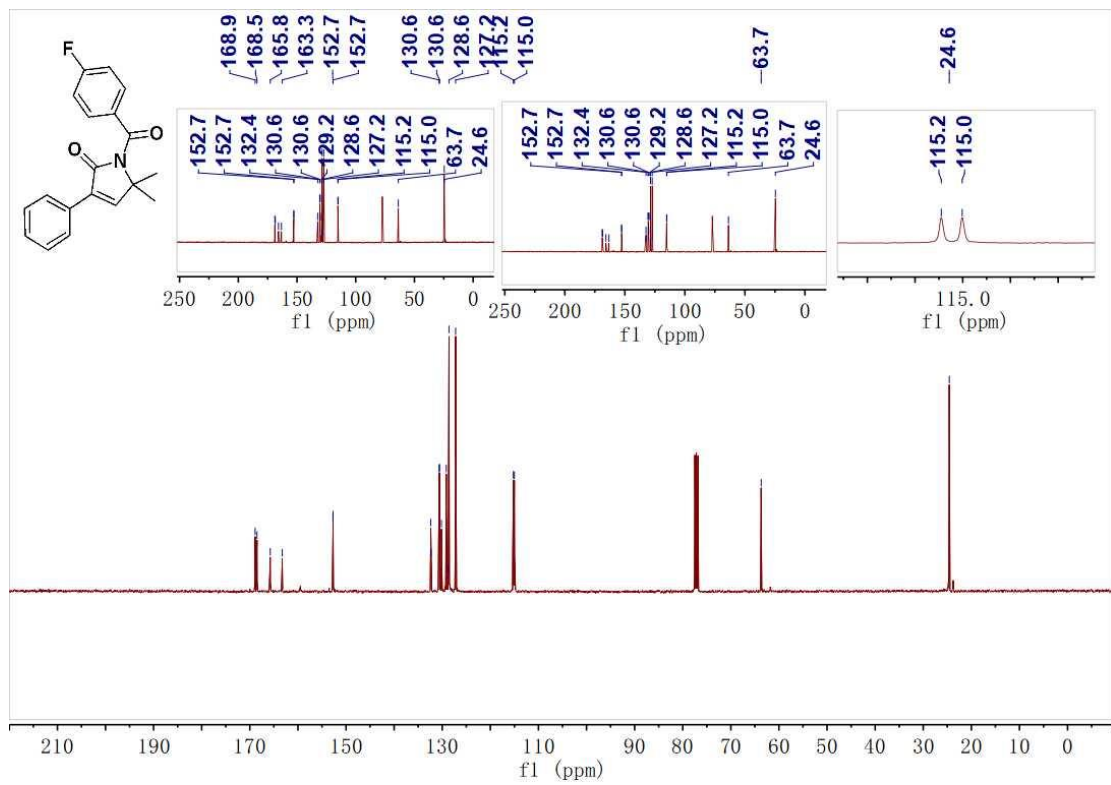

2i

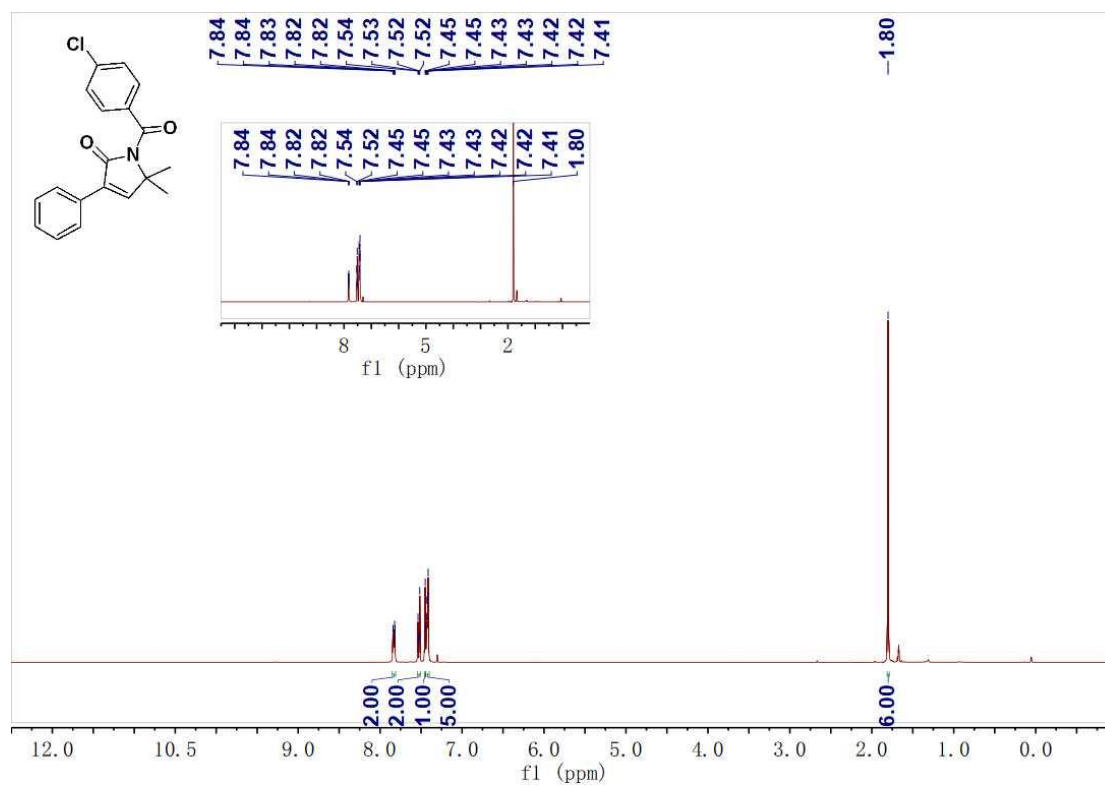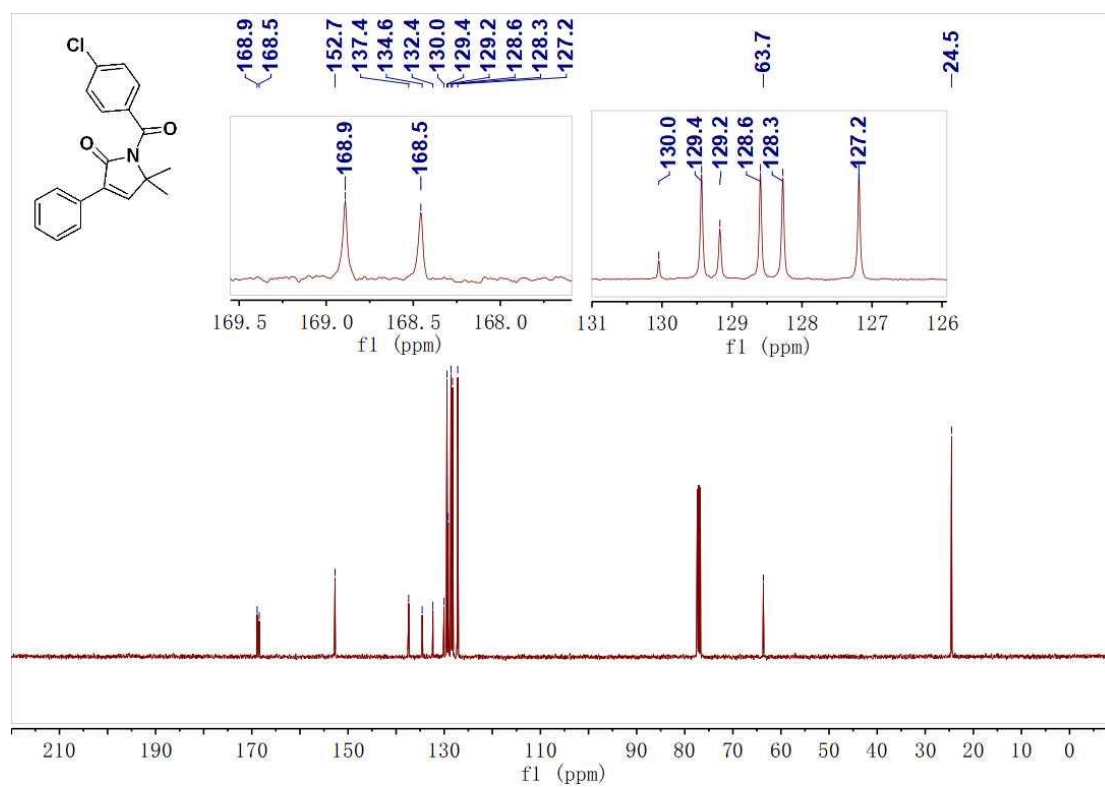

2j

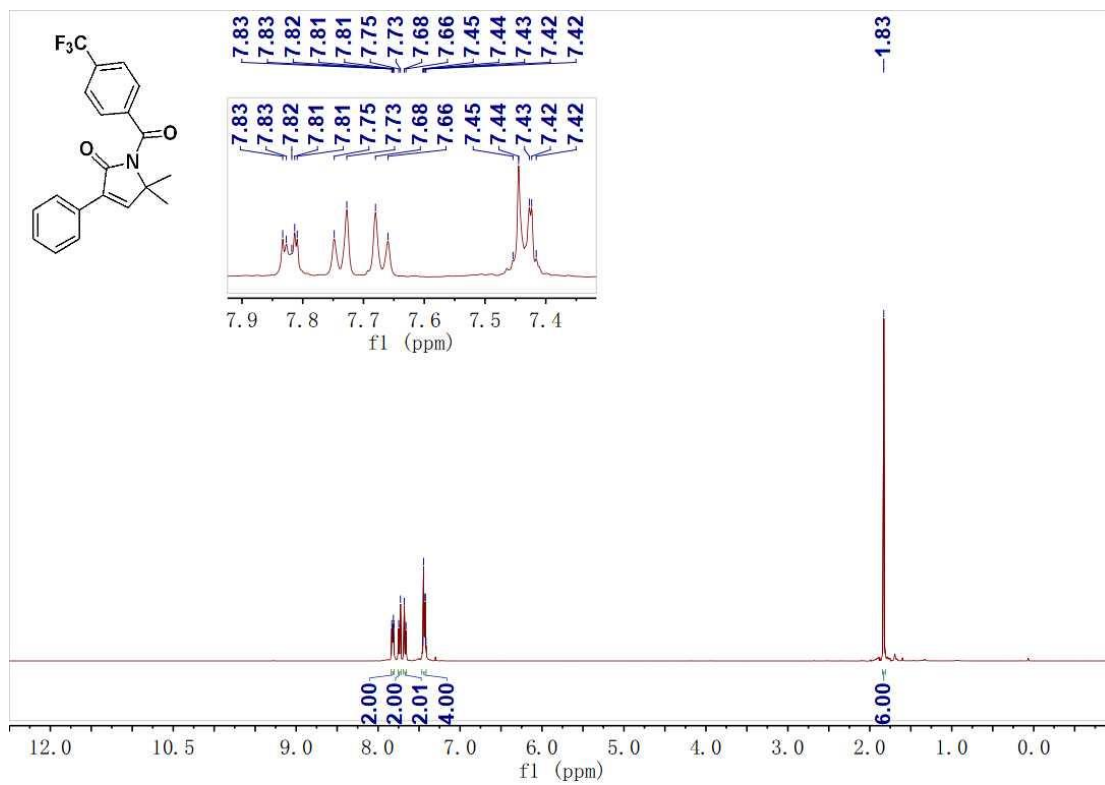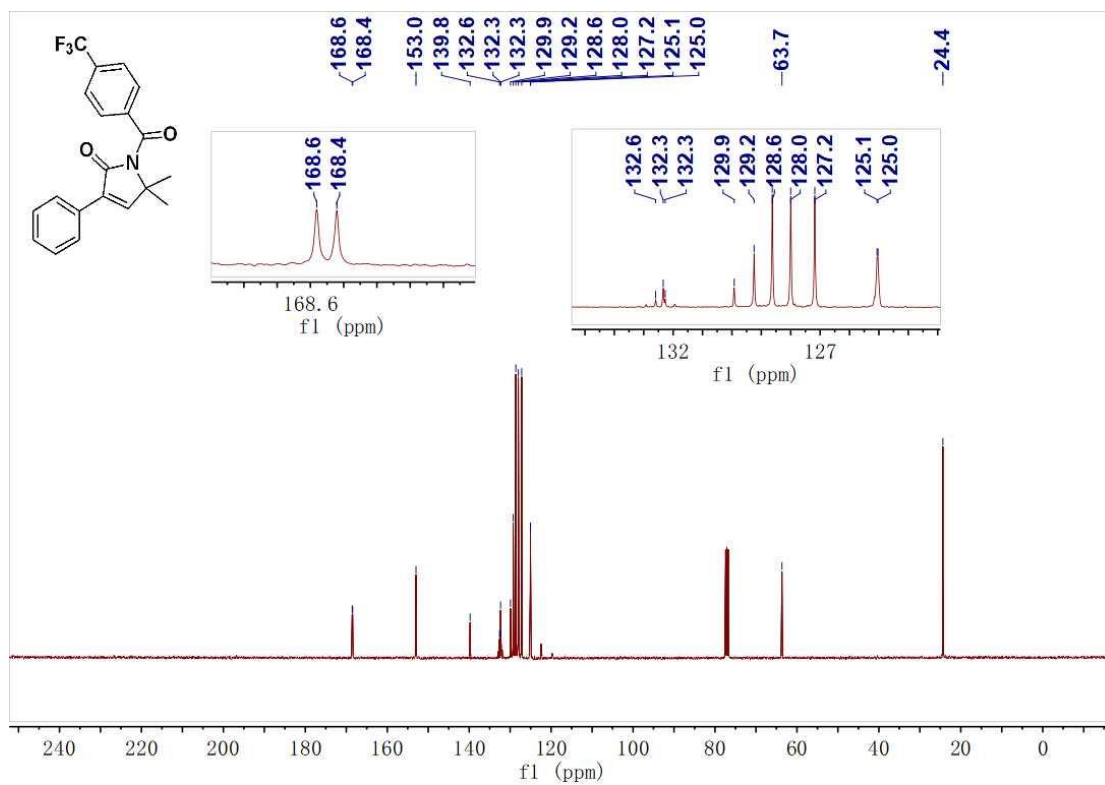



2k

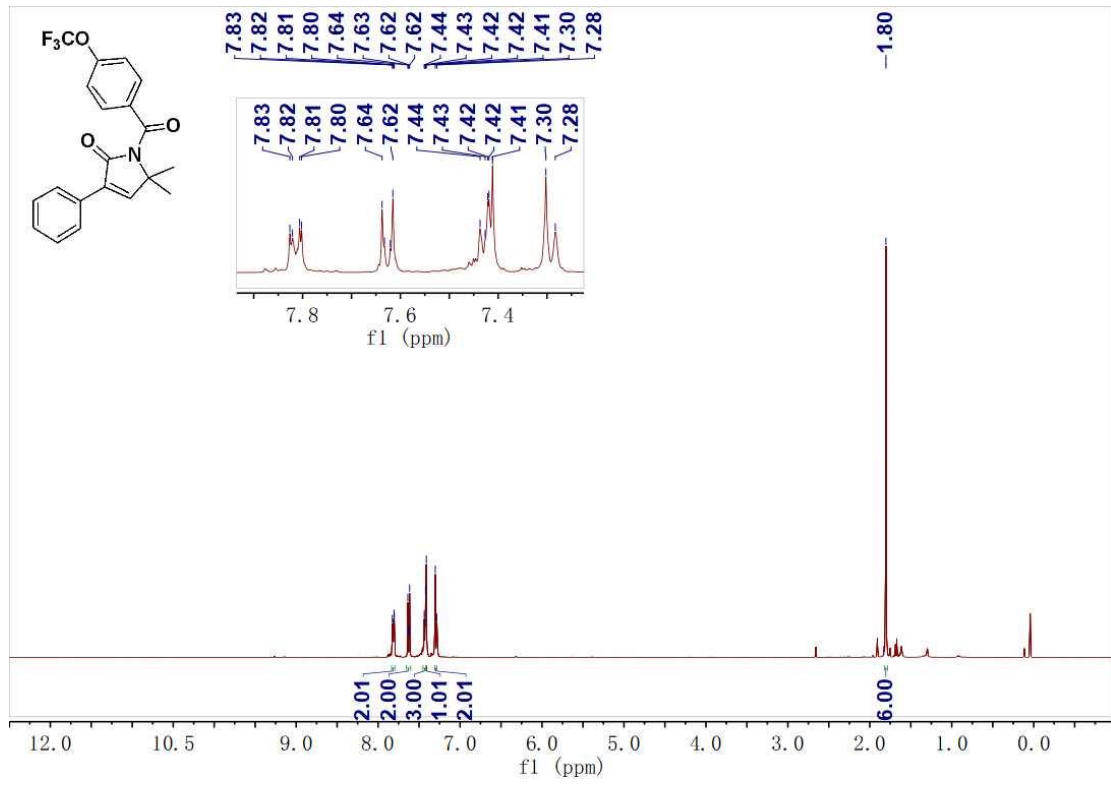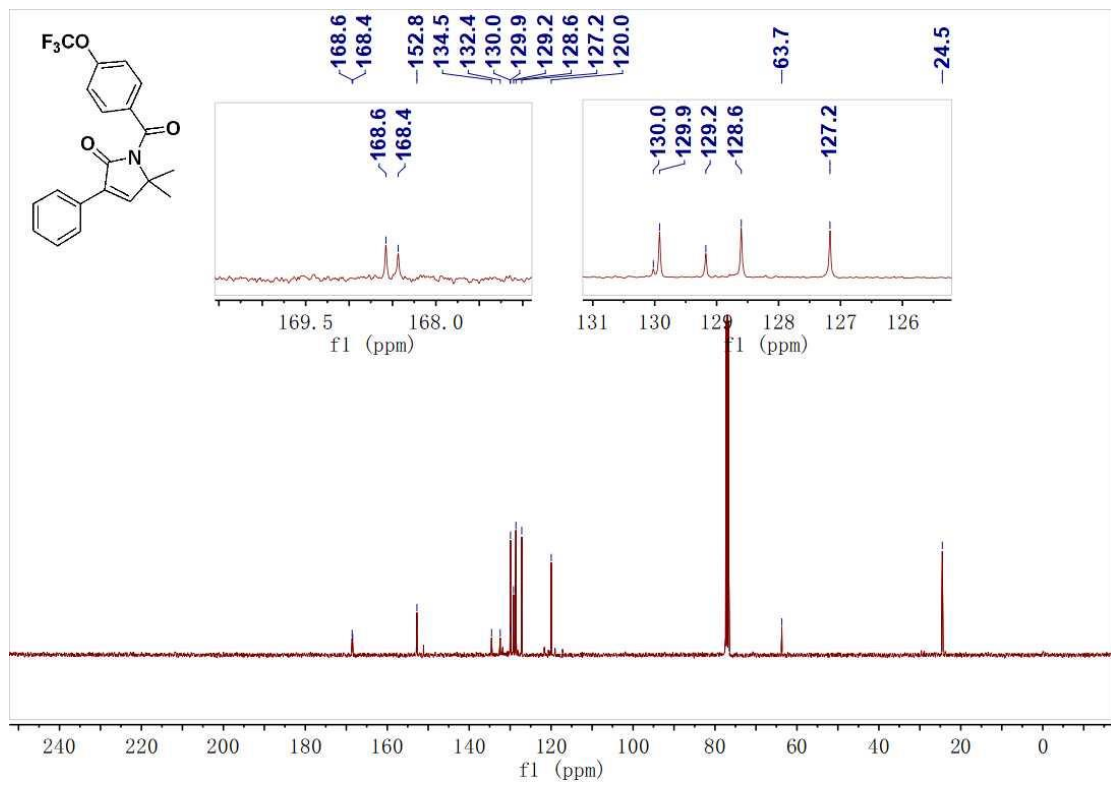



## 21

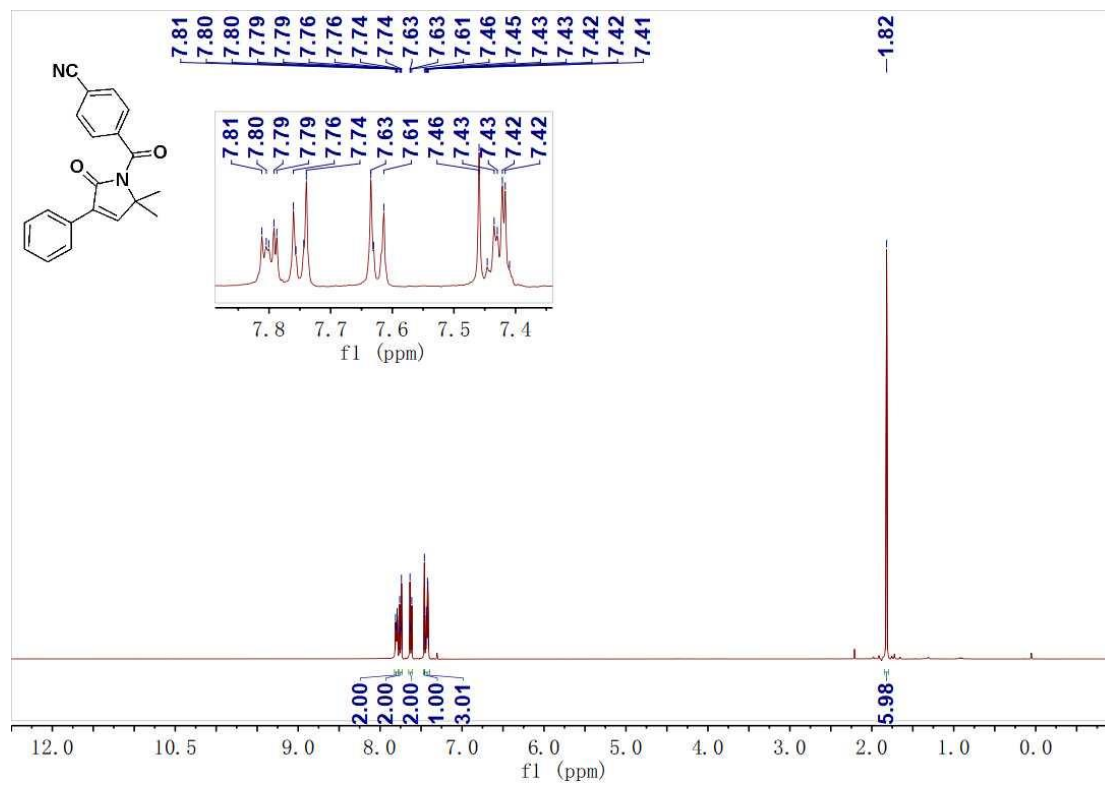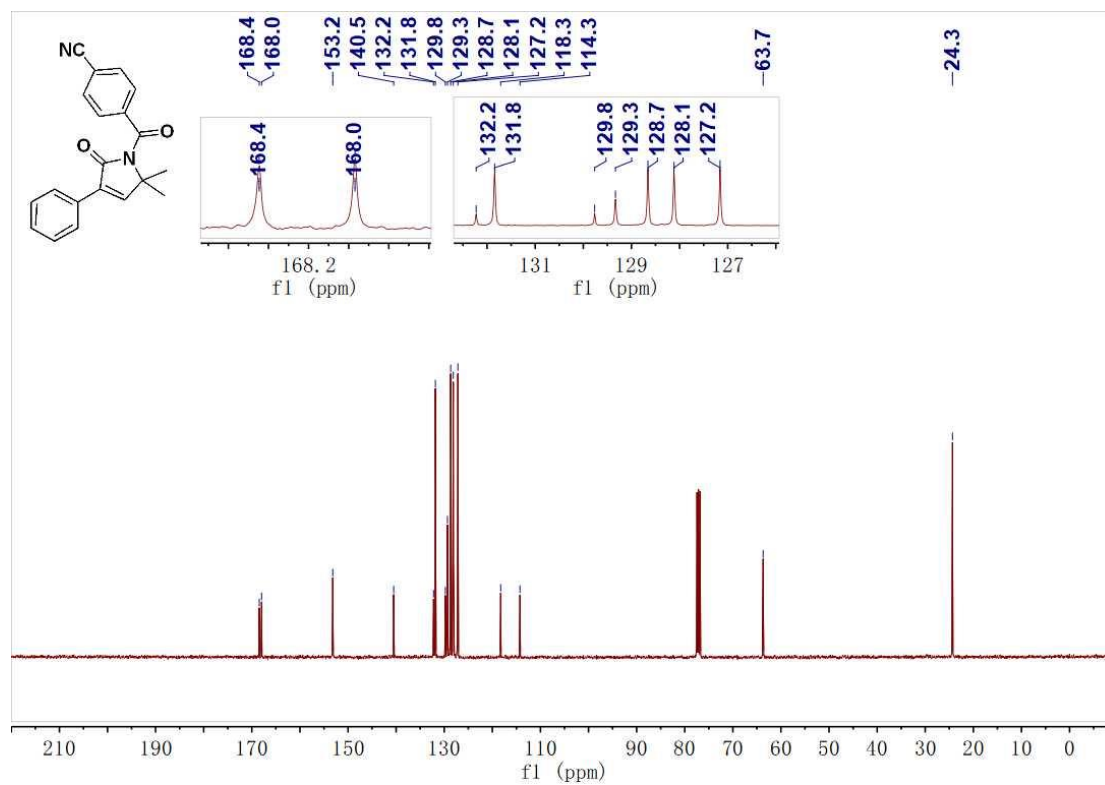

## 2m

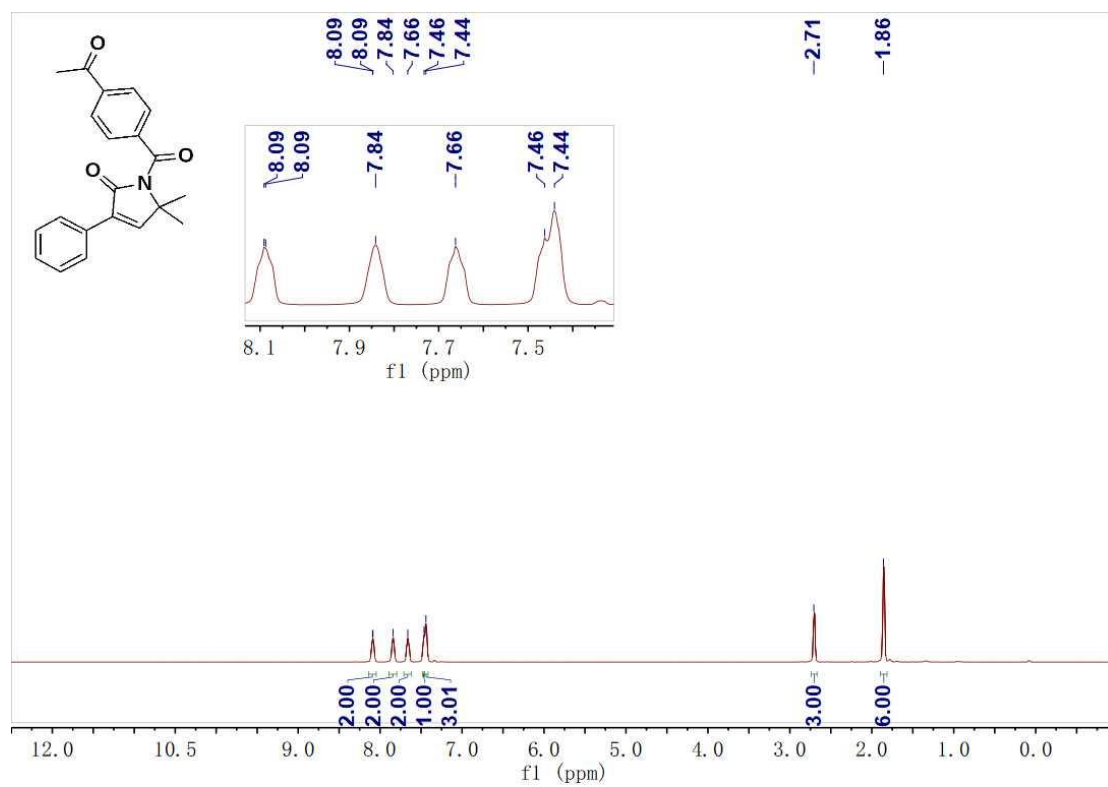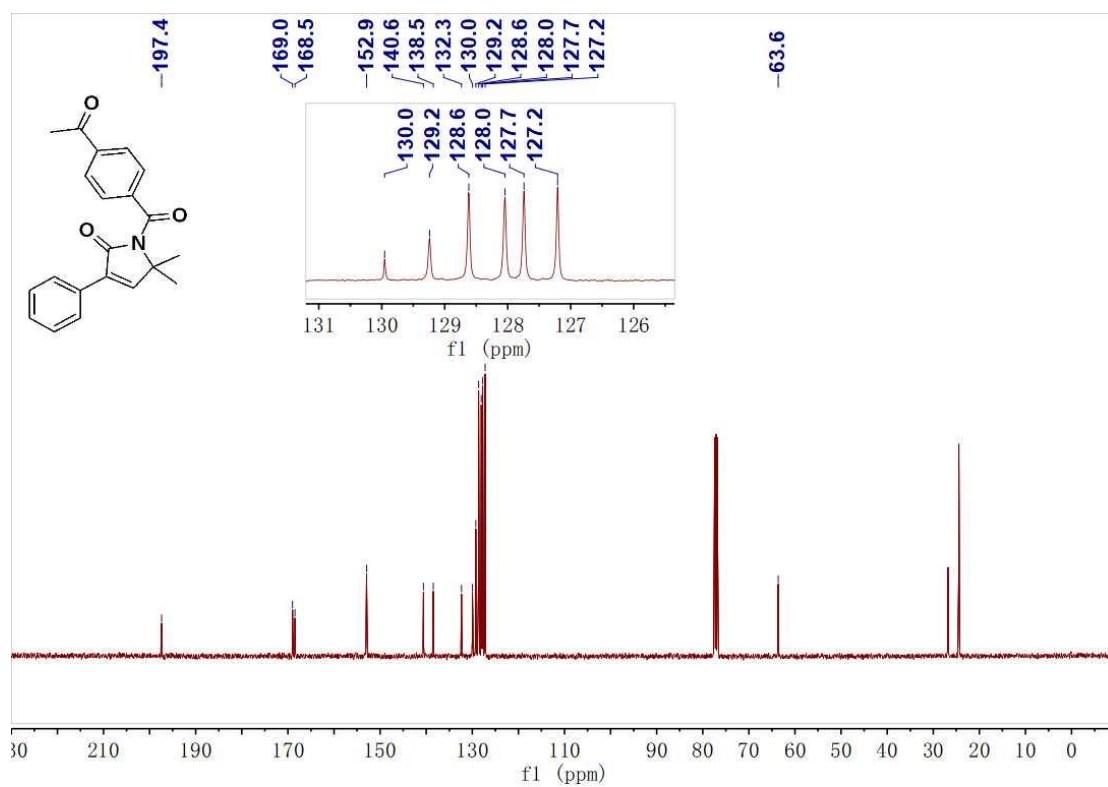

2n

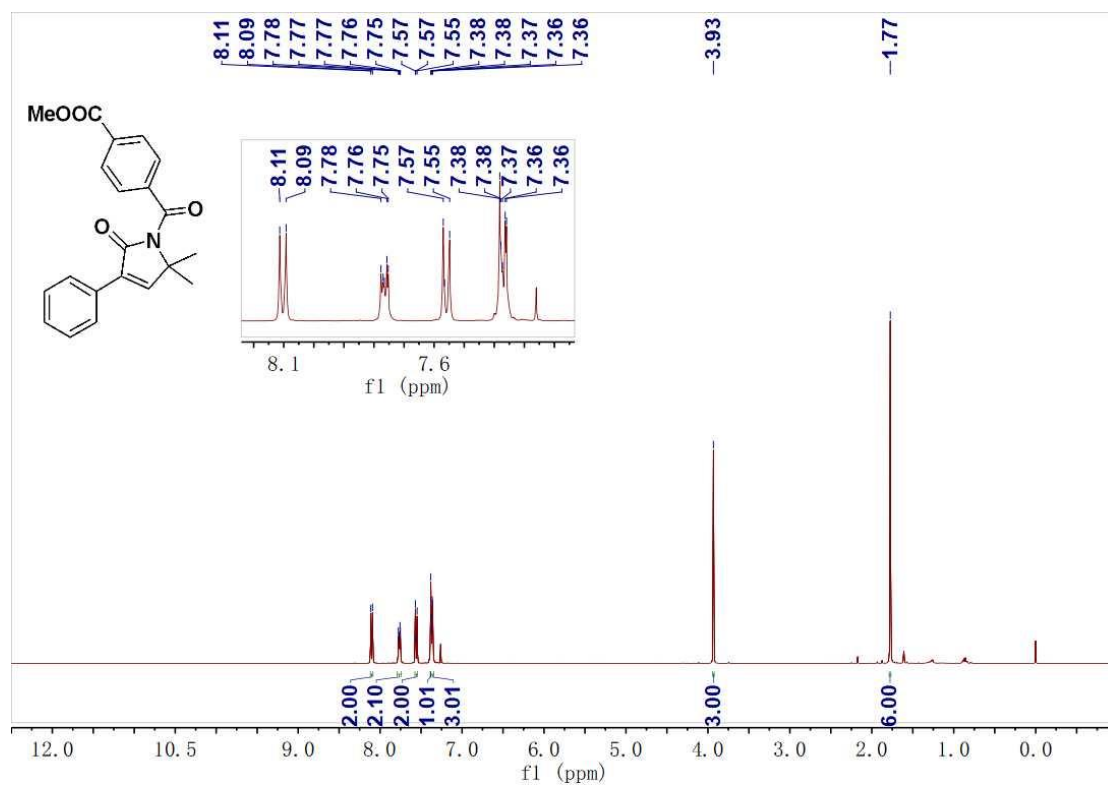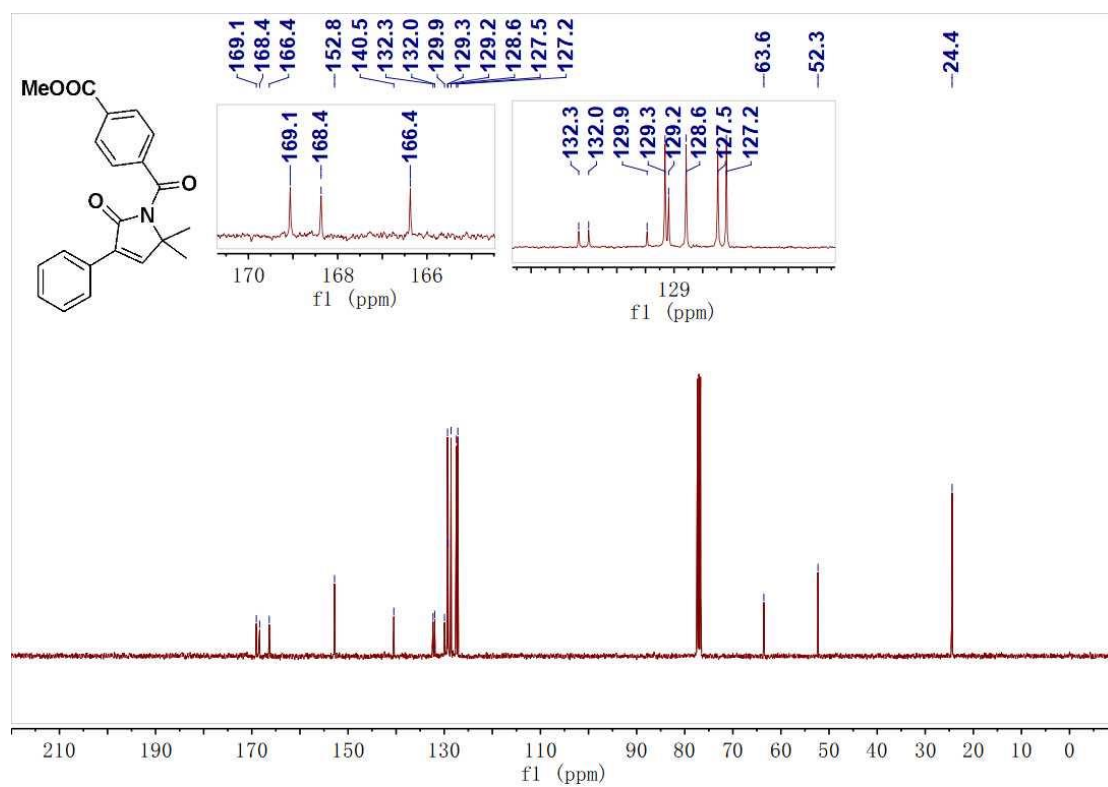

20

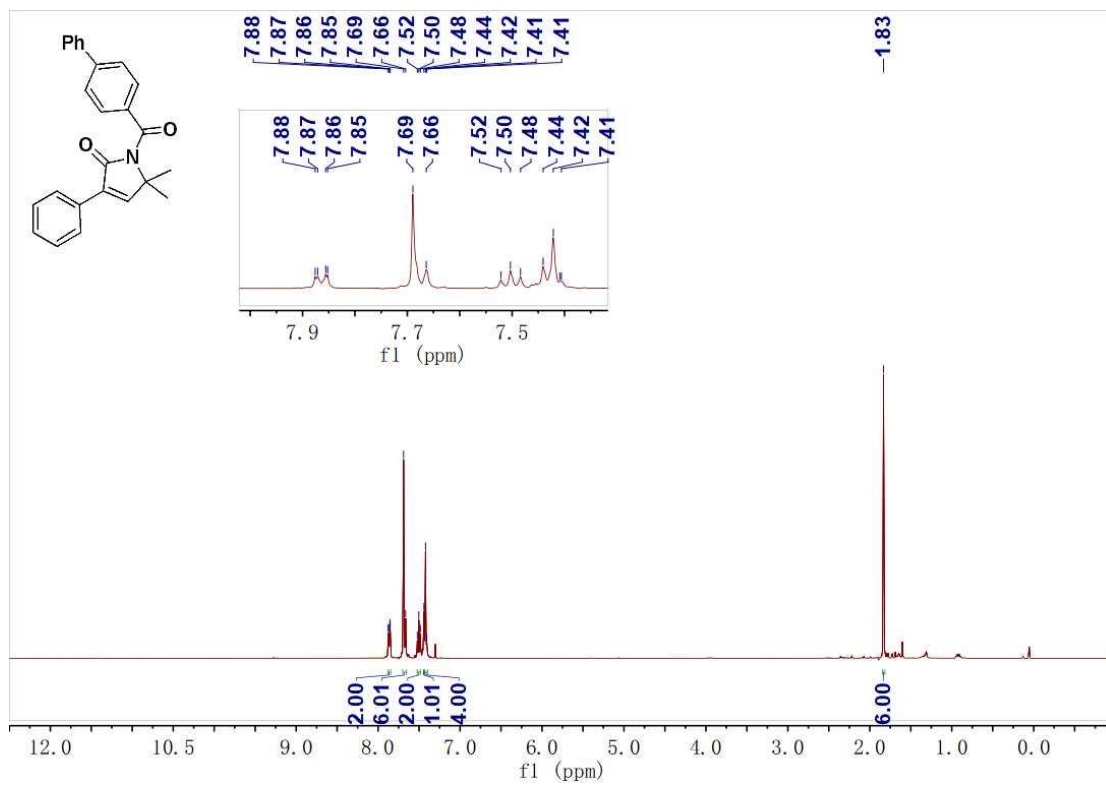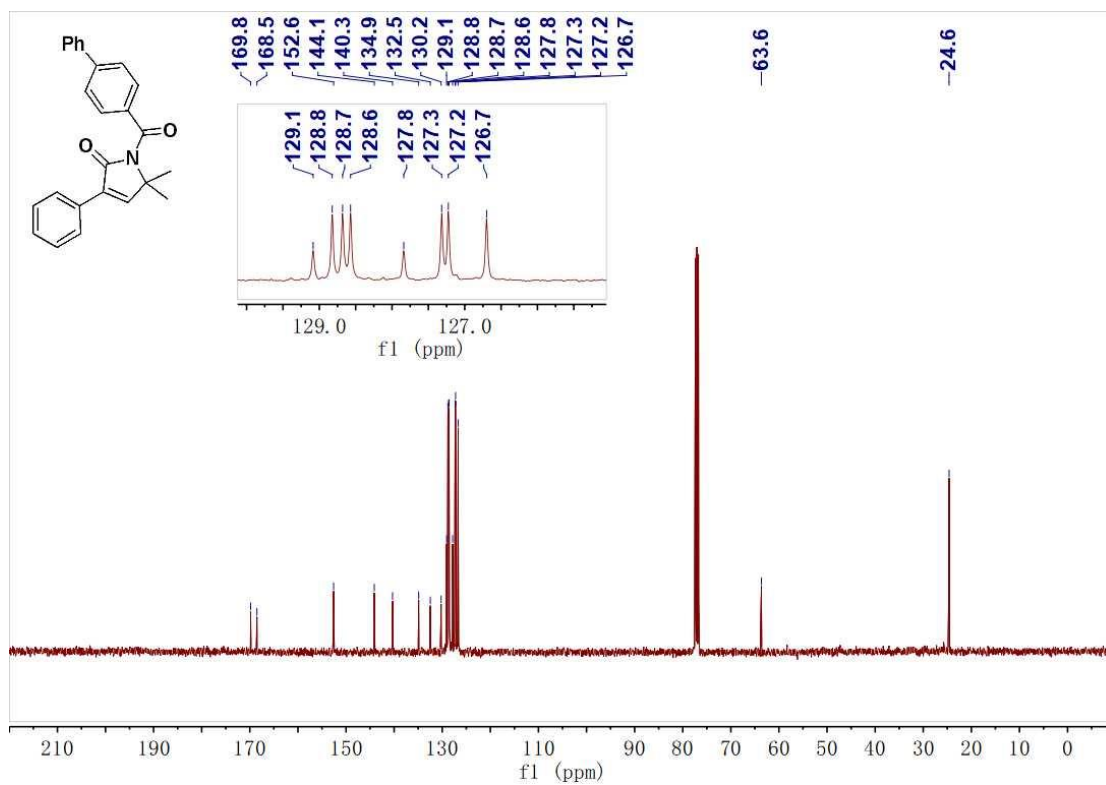

S60

## 2p

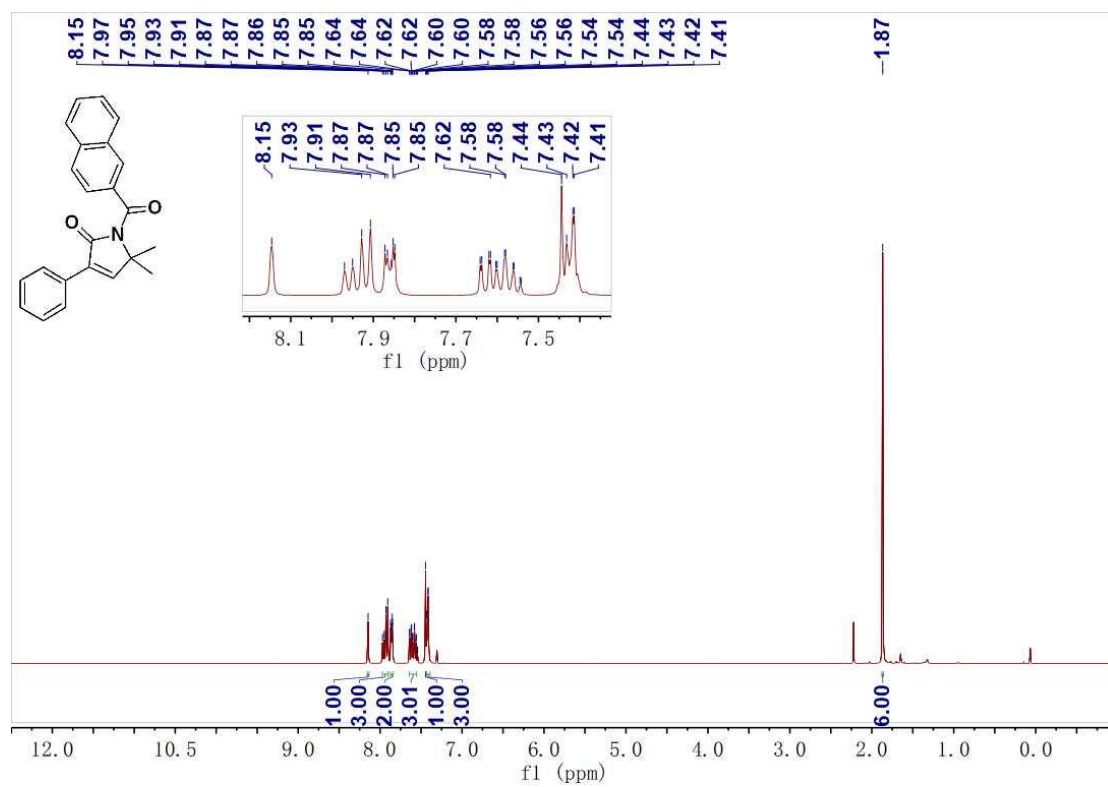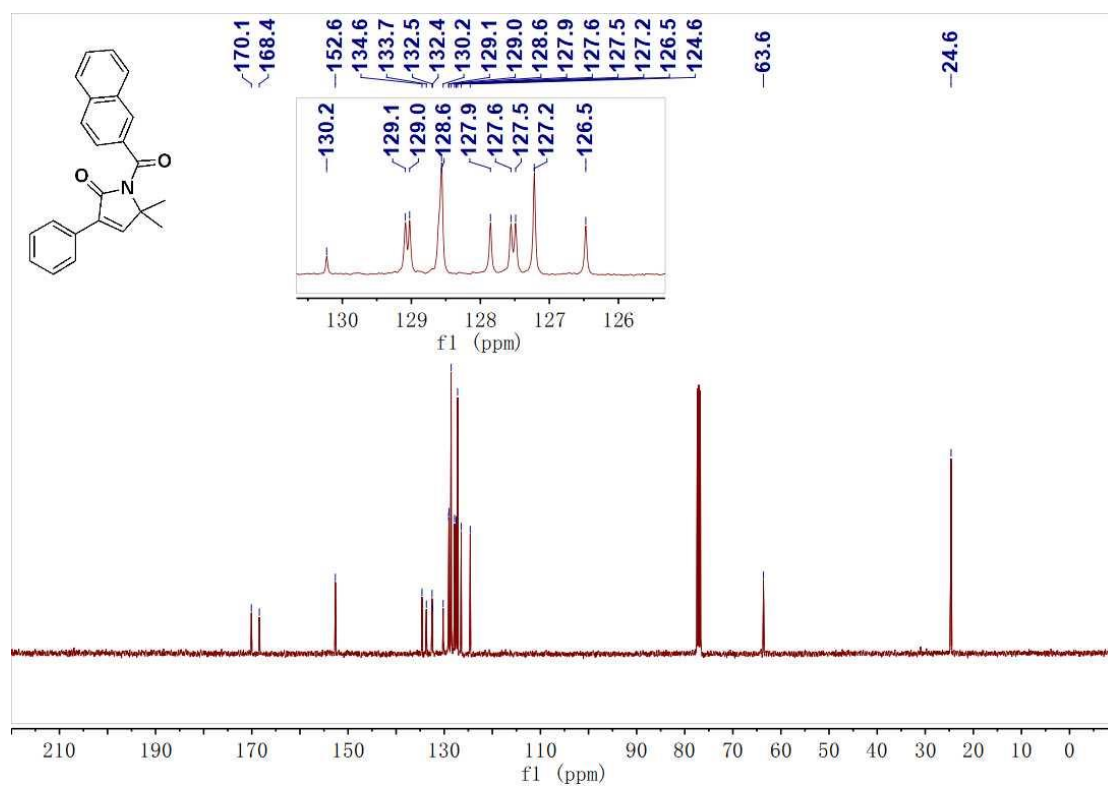

# 2q

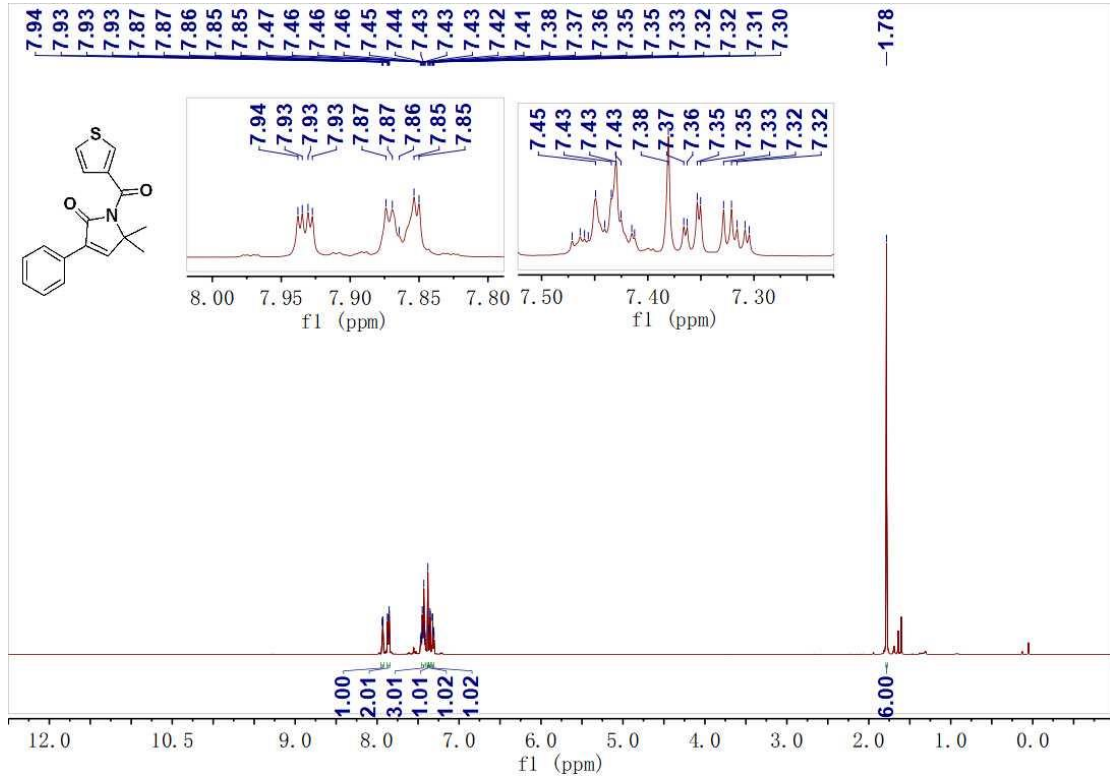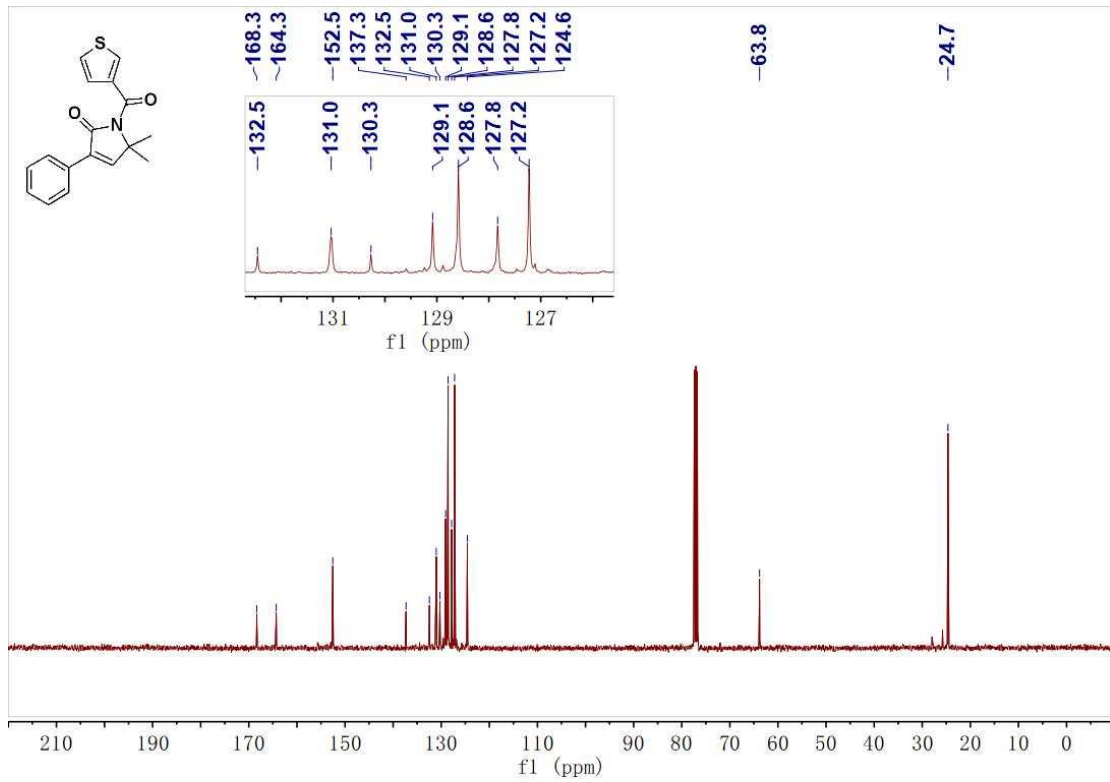

# 2r

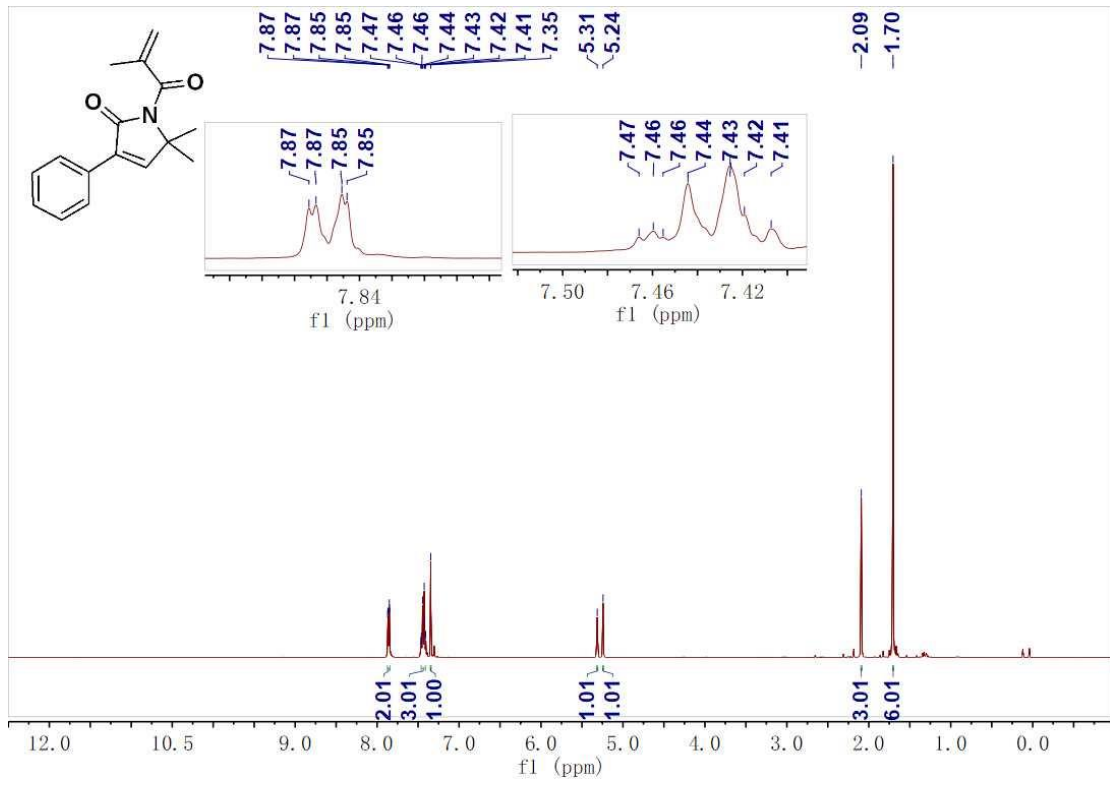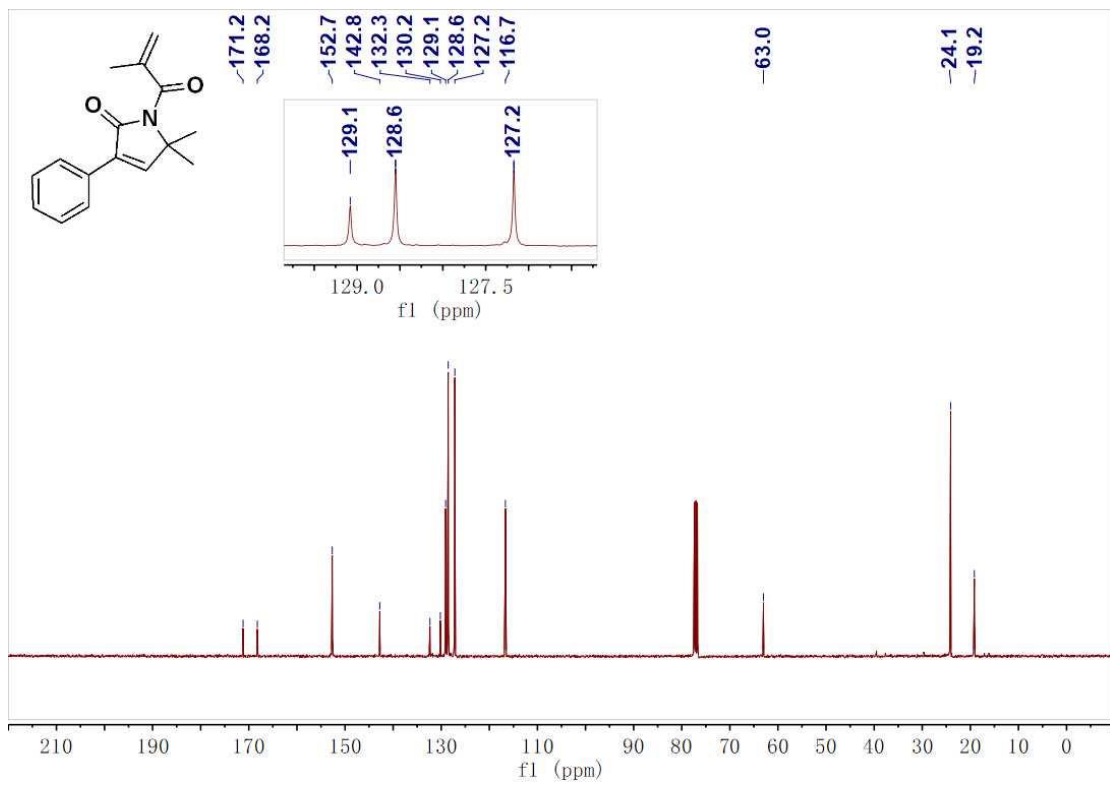



2s

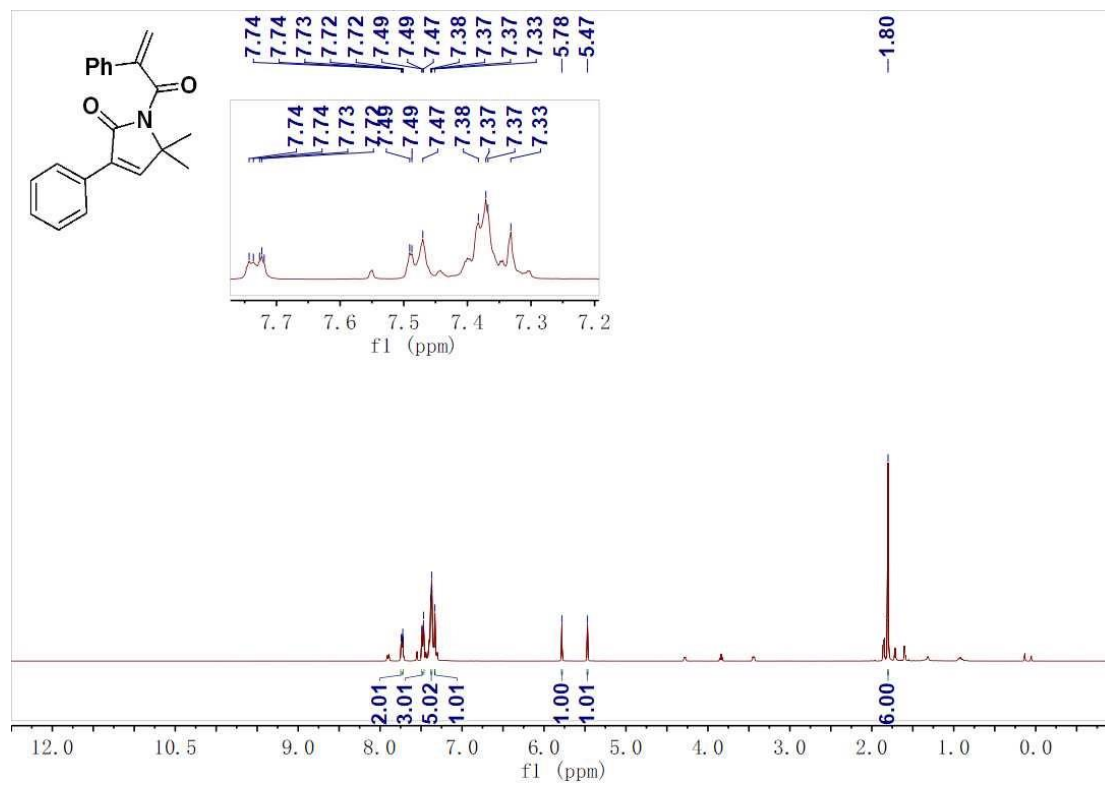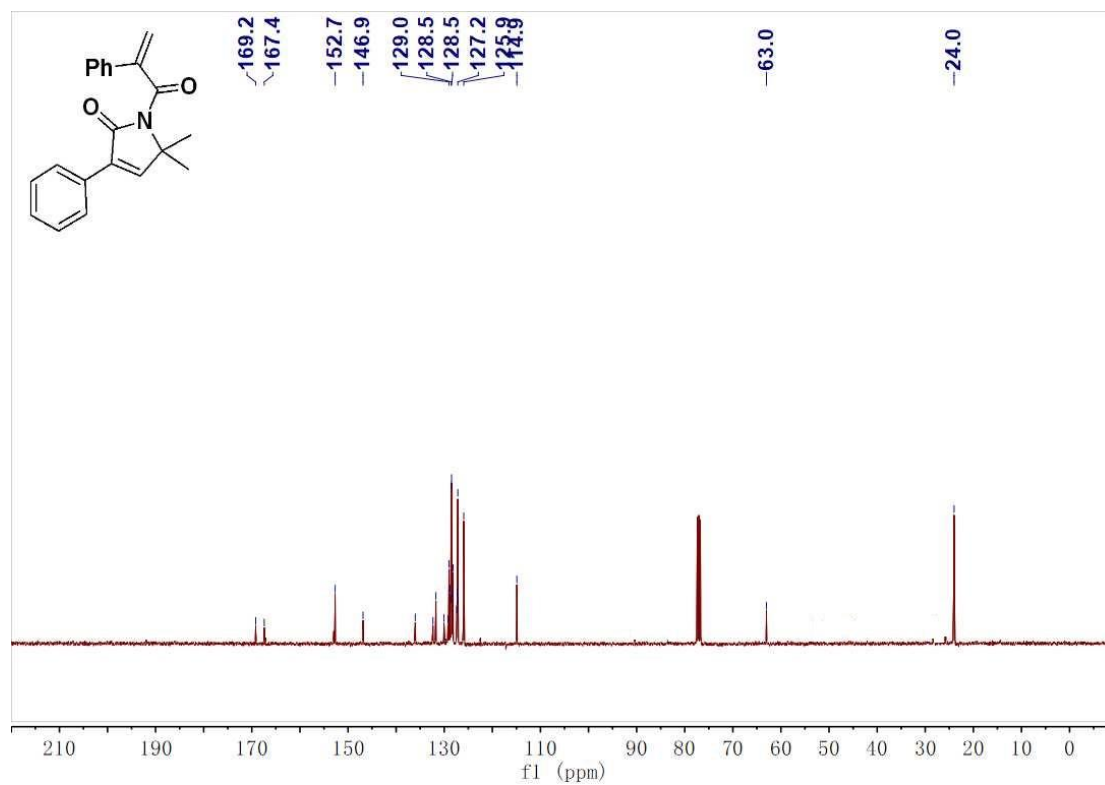



## 2aa

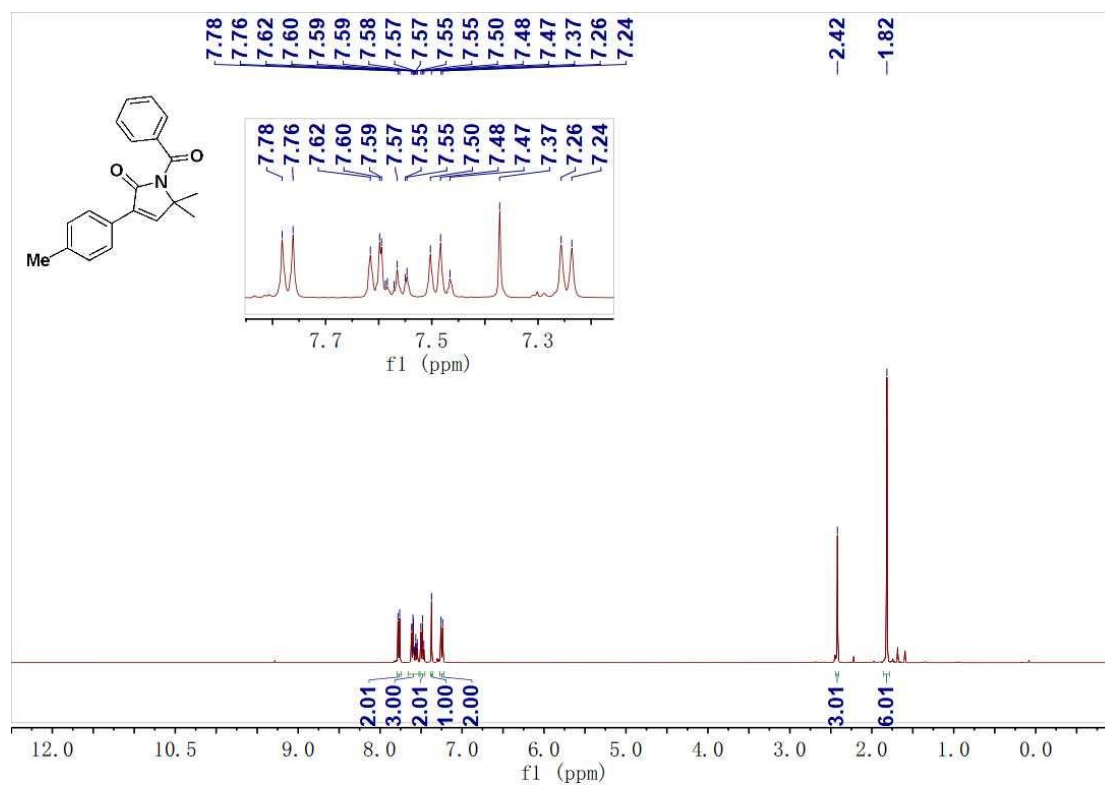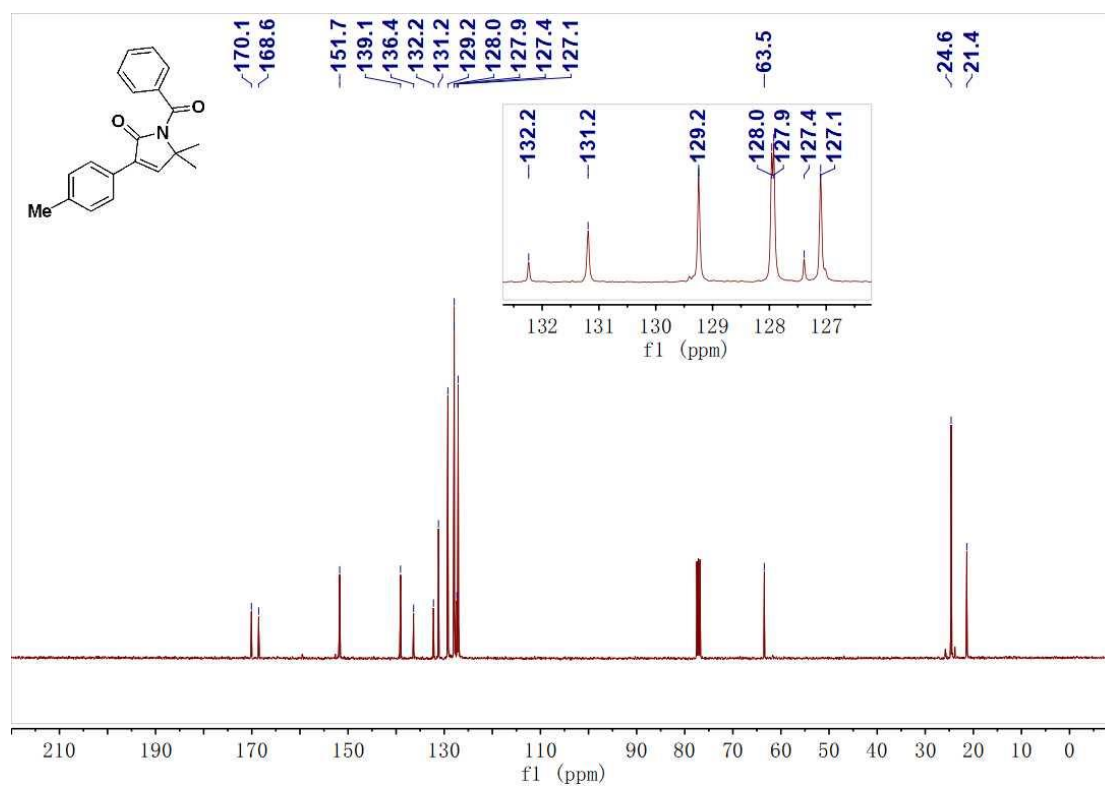

## 2ab

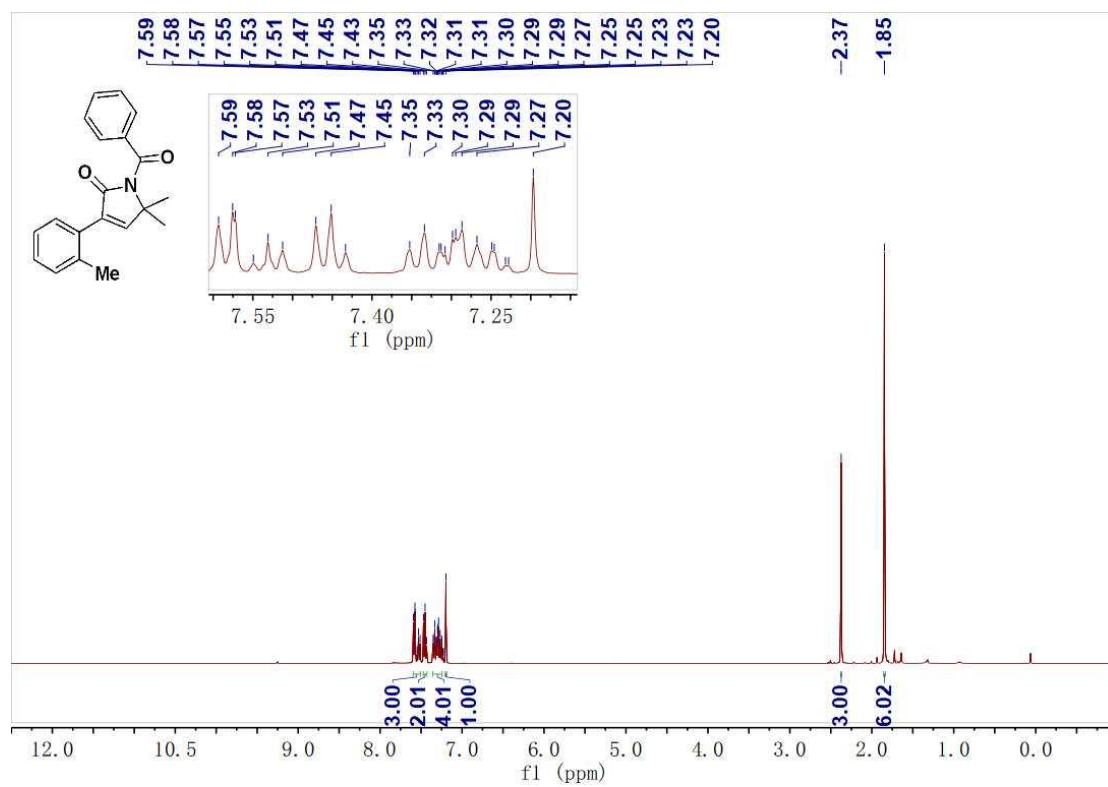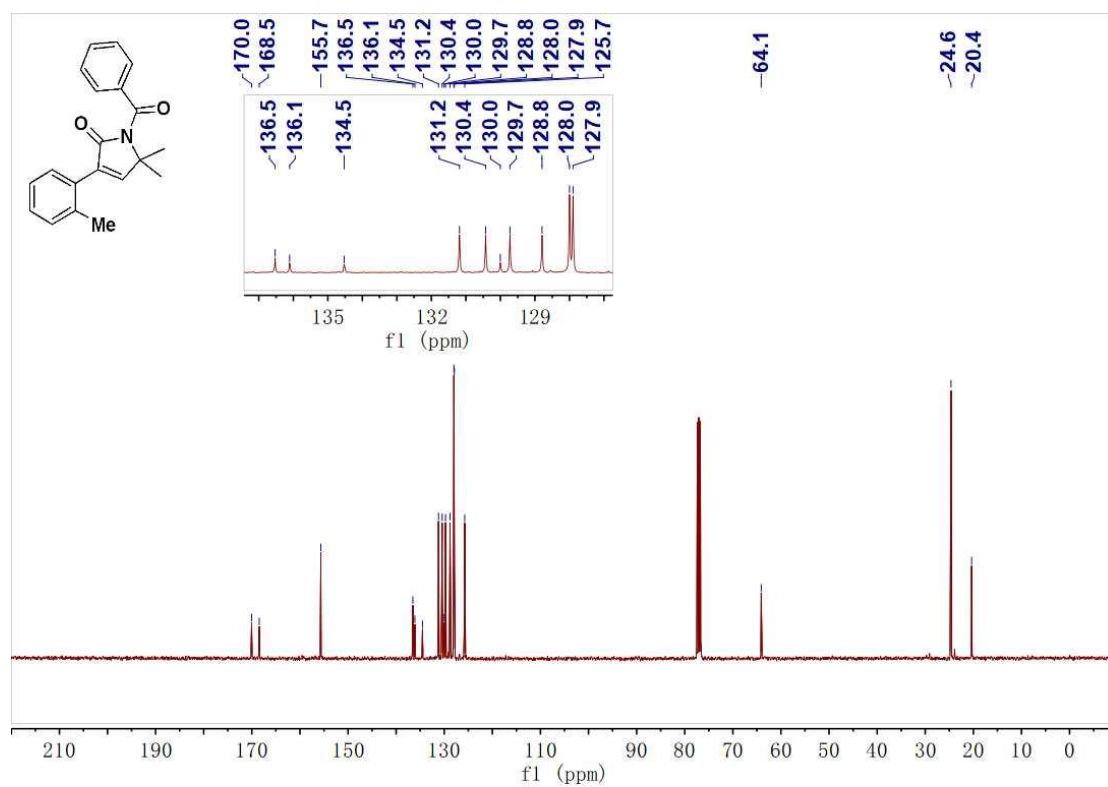

## 2ac

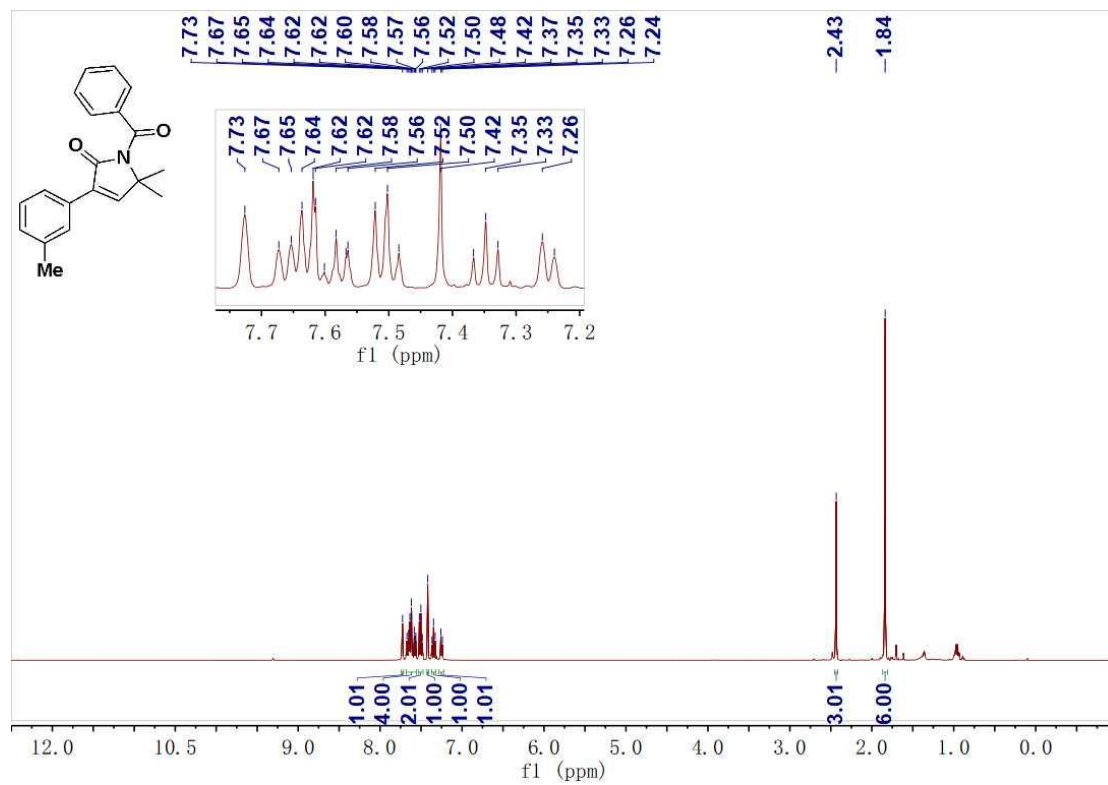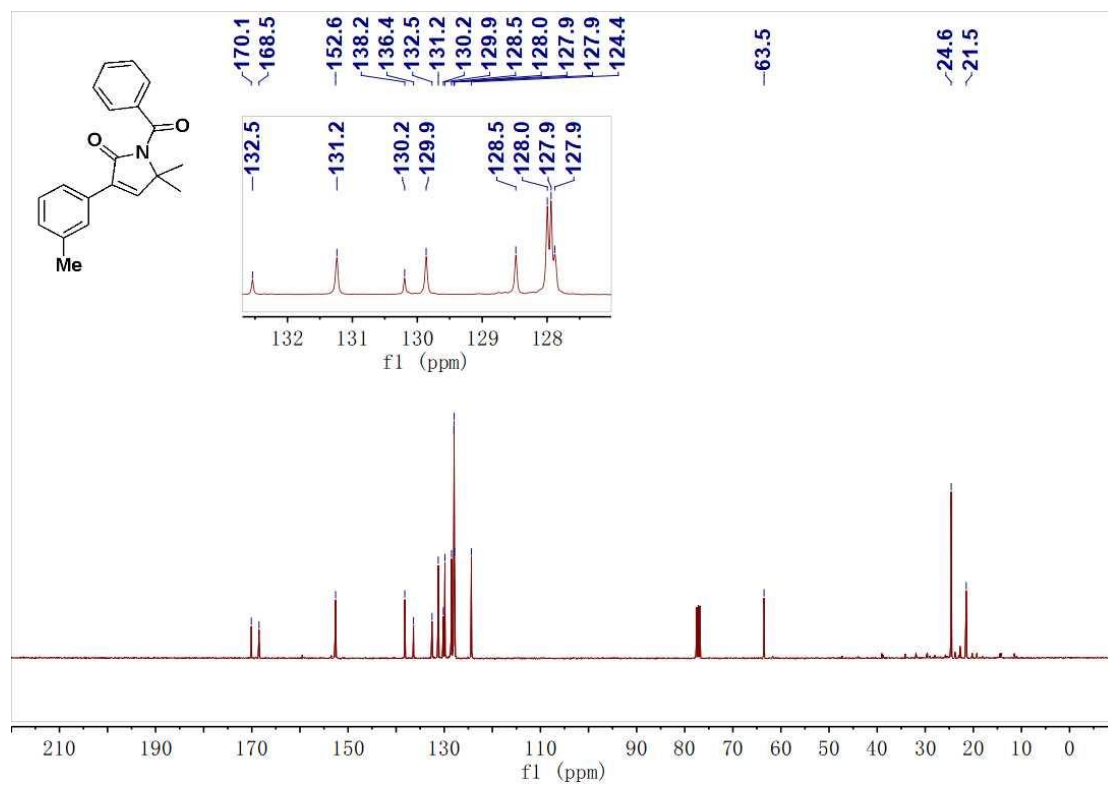

## 2ad

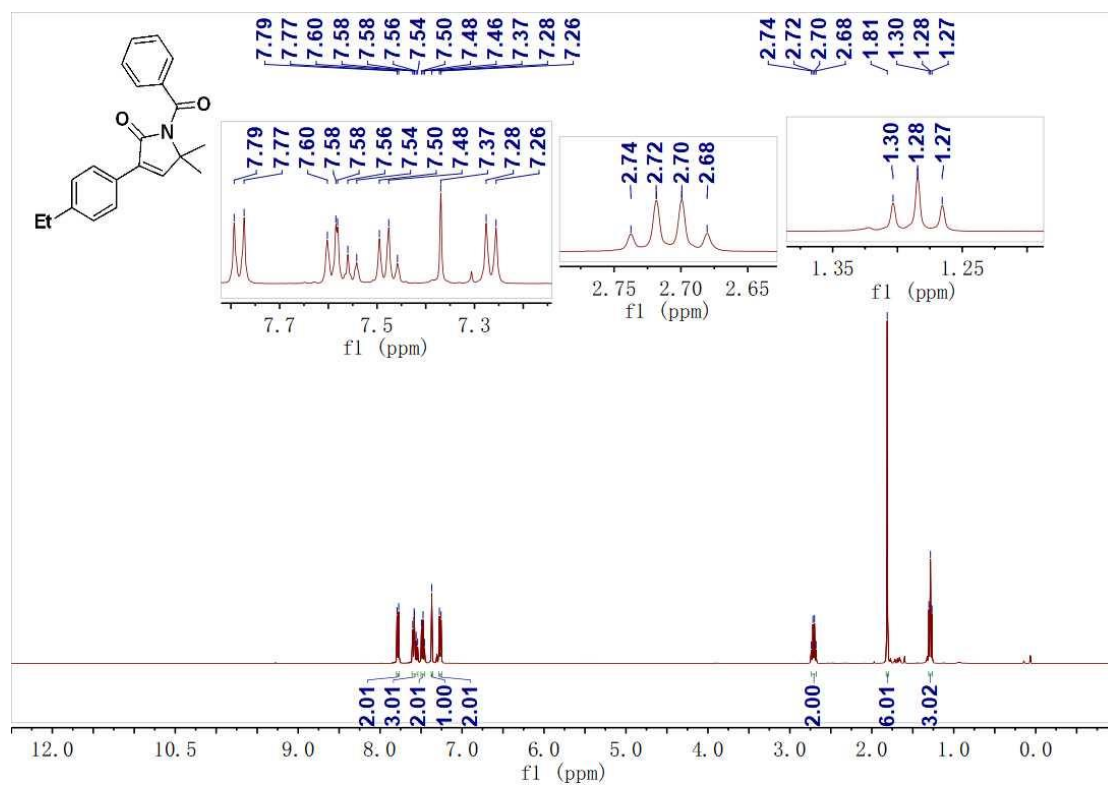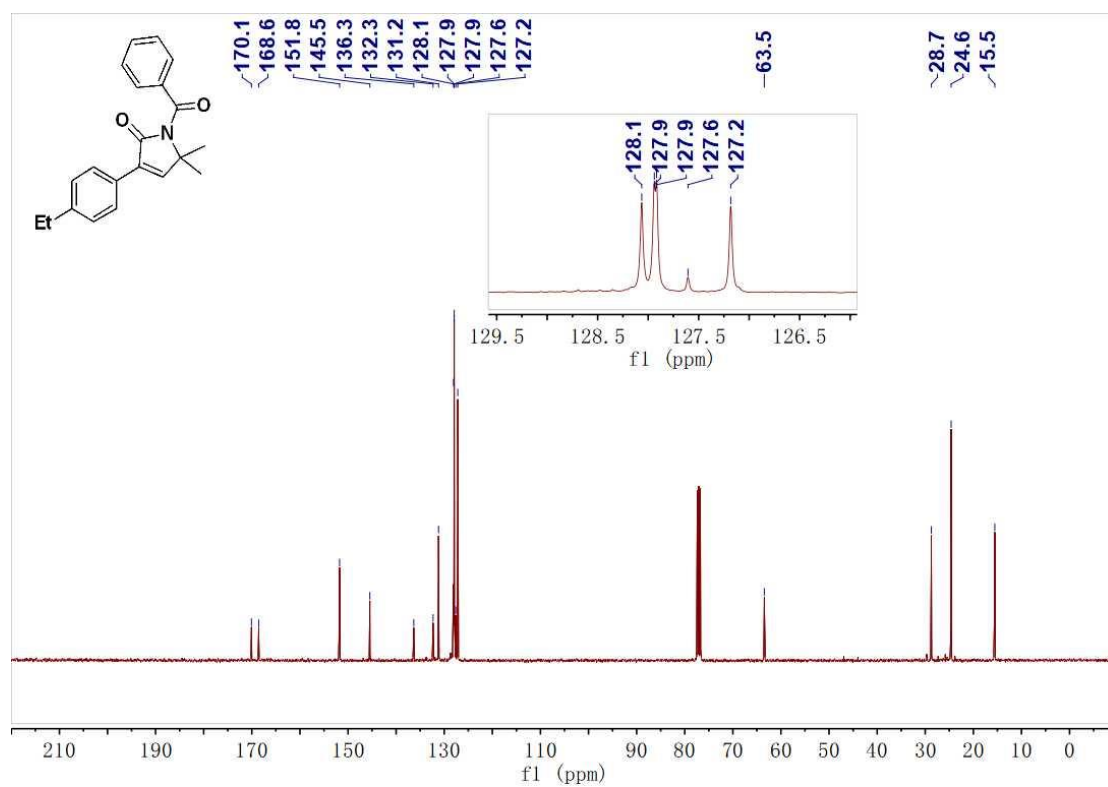

## 2ae

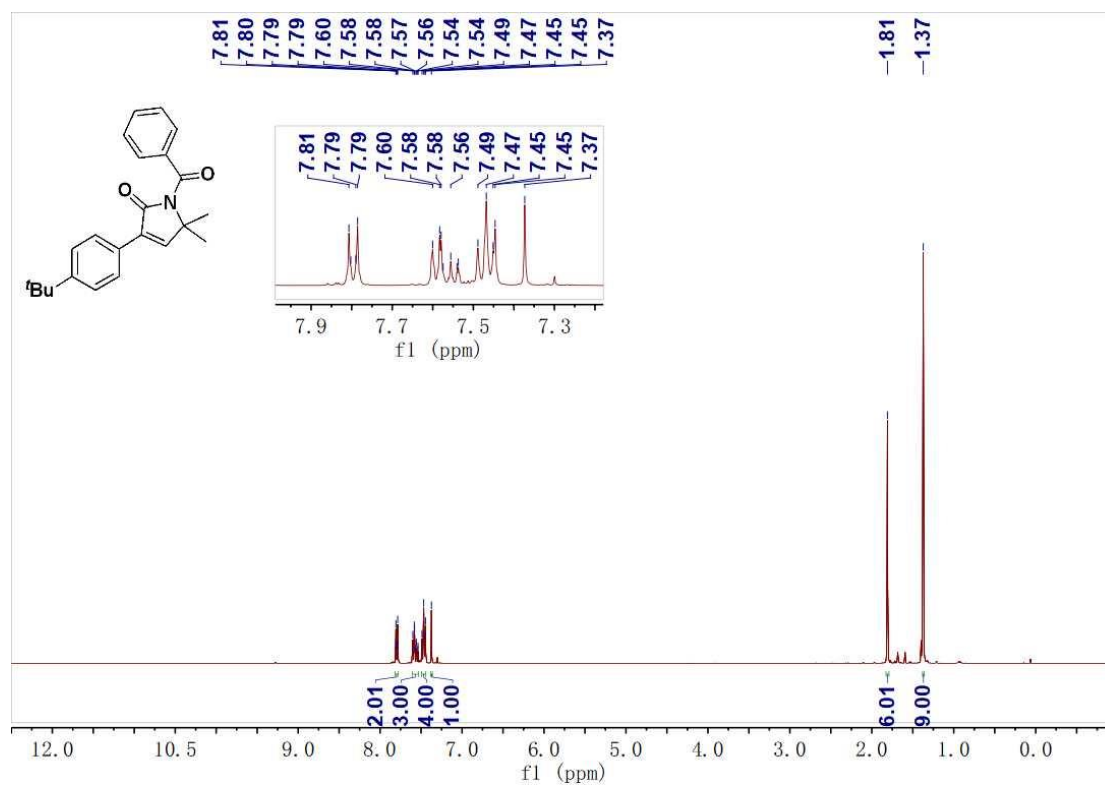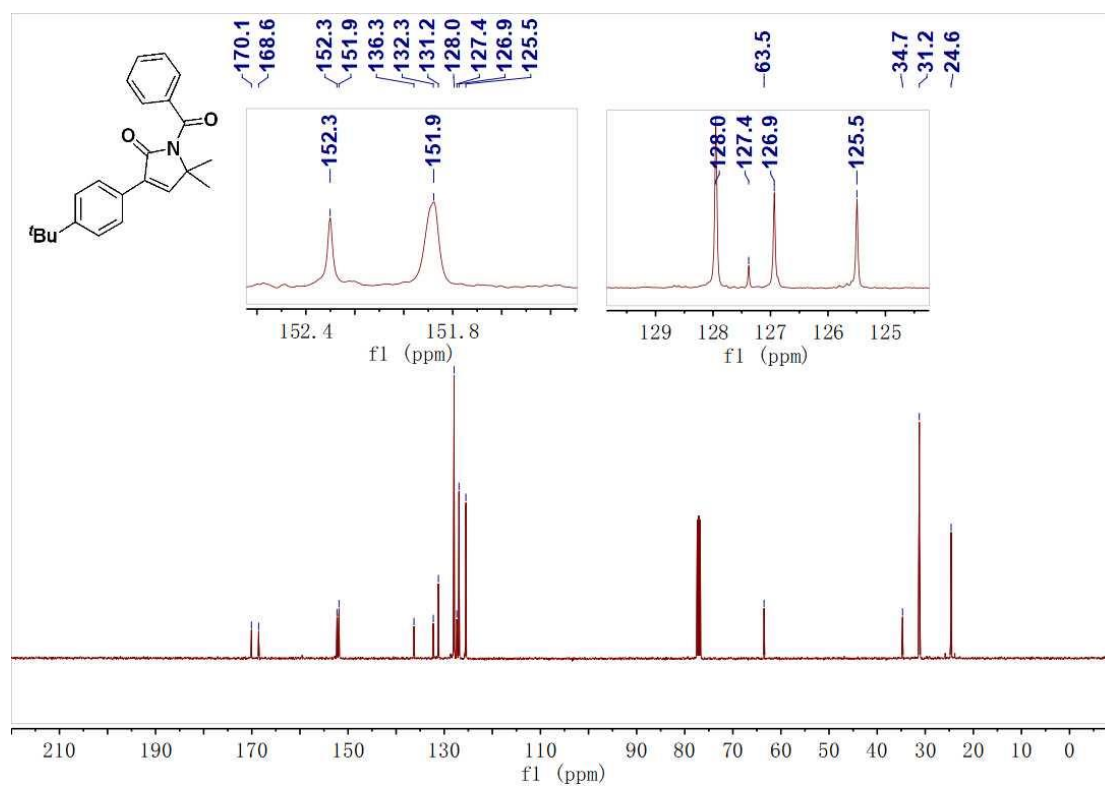

## 2af

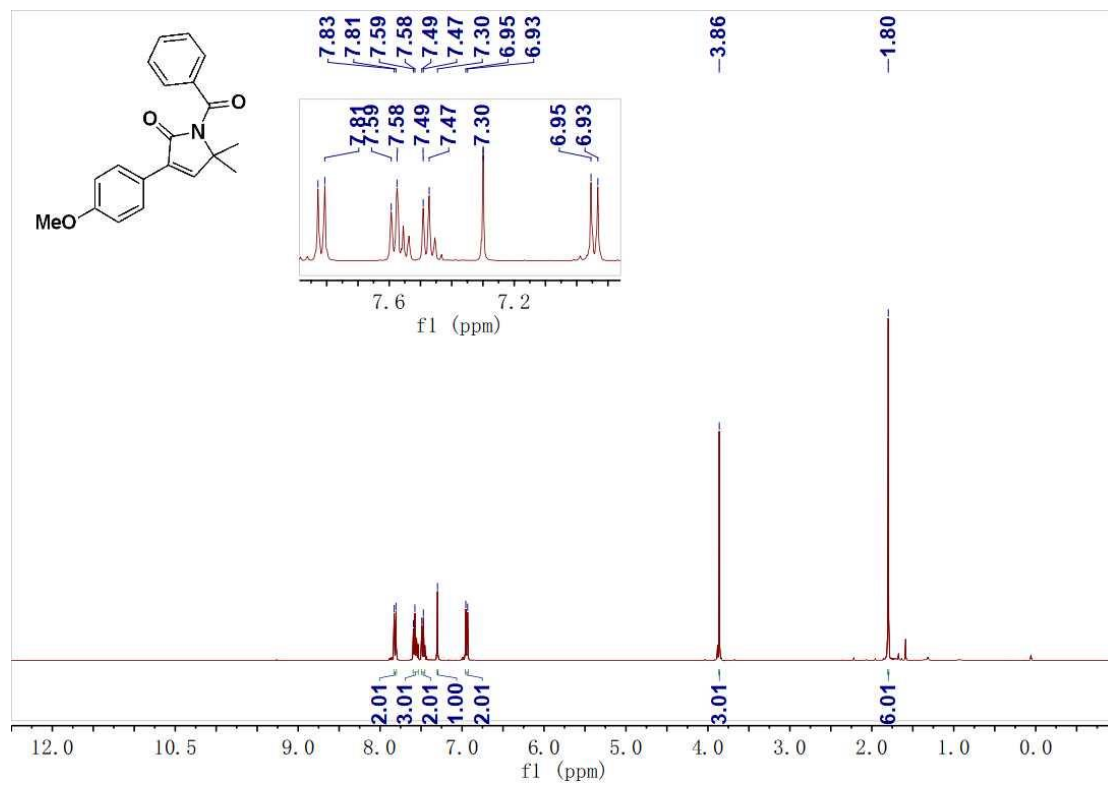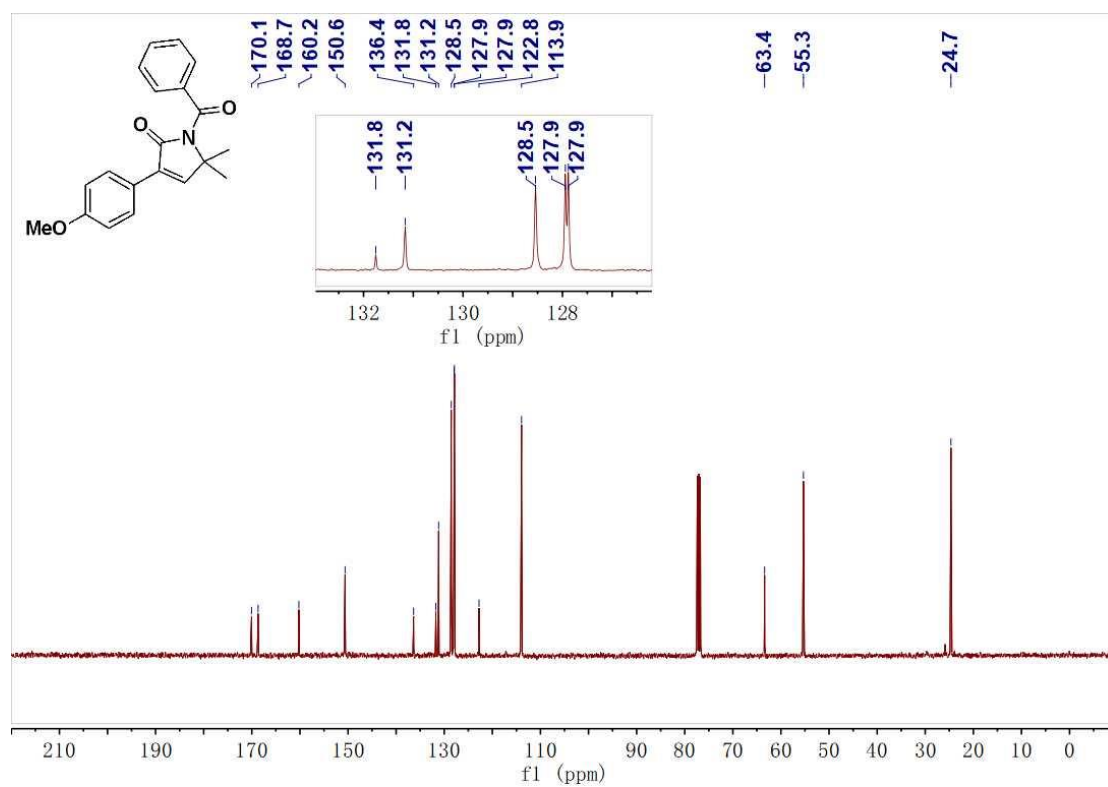

## 2ag

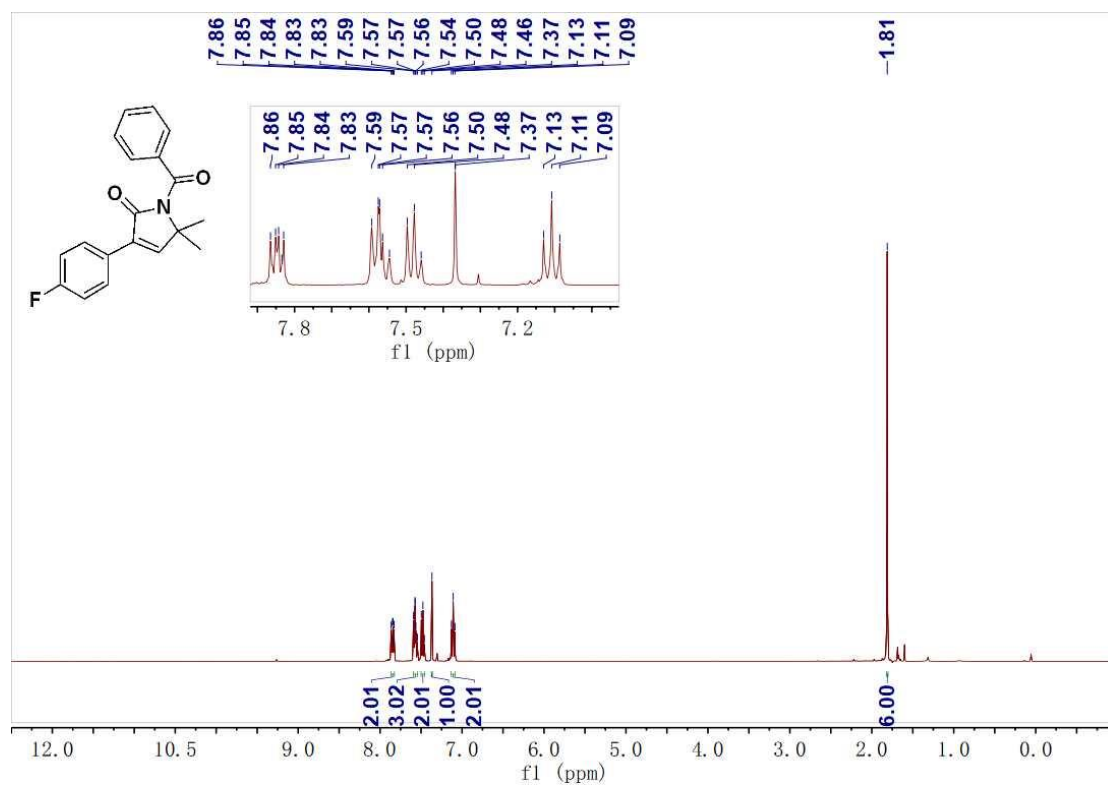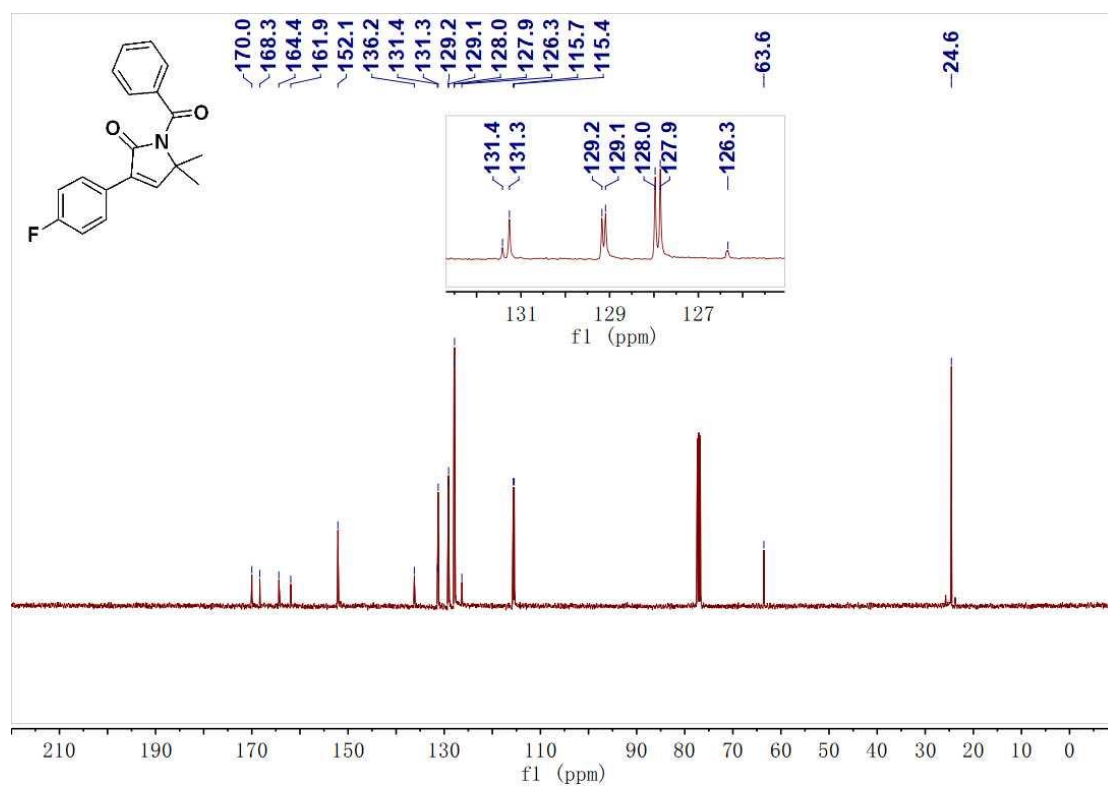



## 2ah

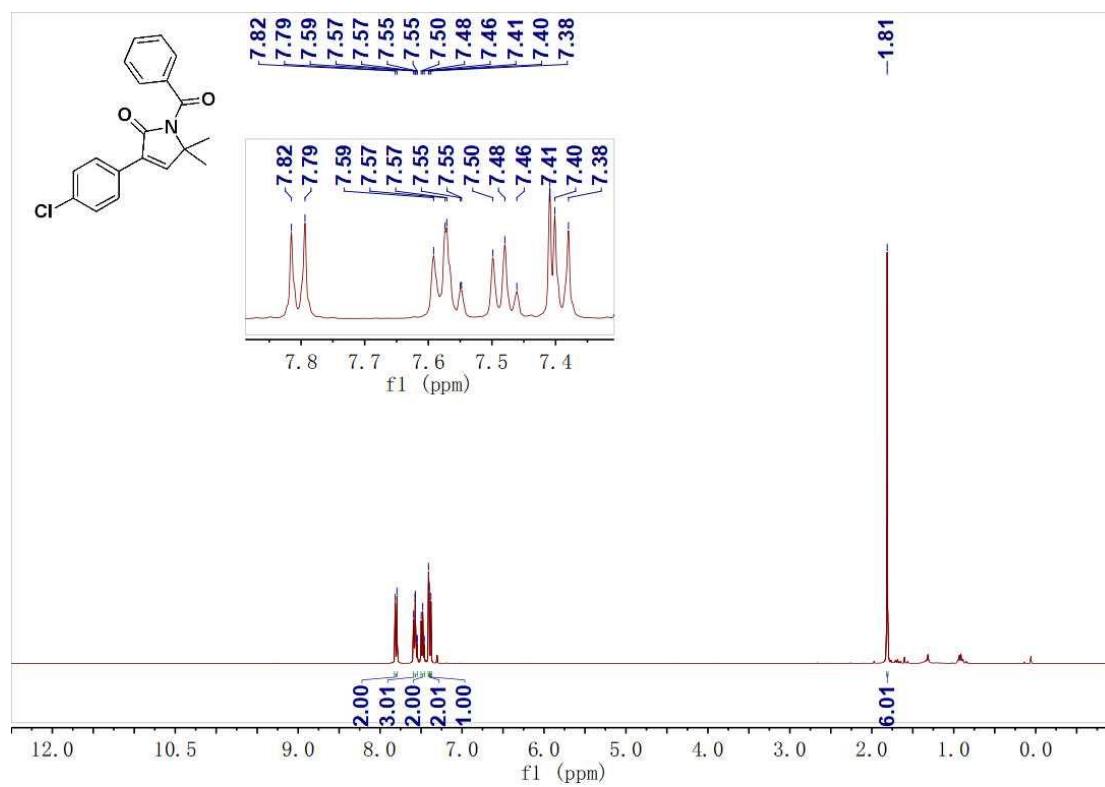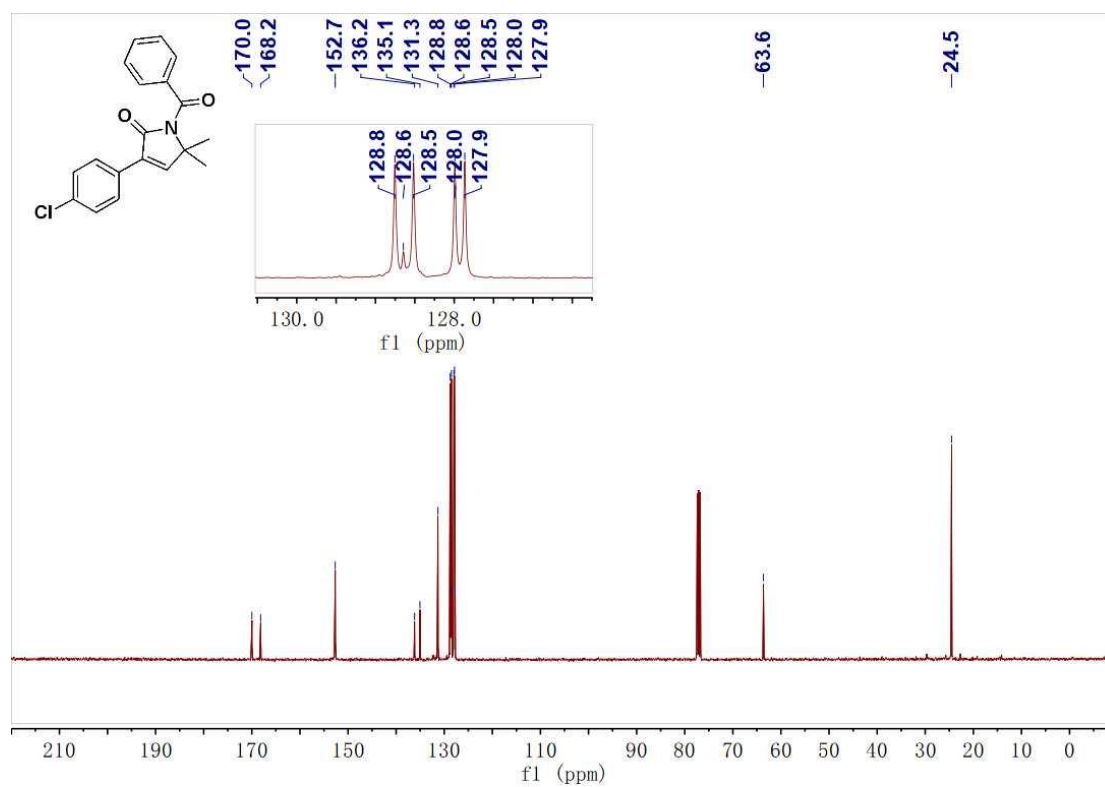



2ai

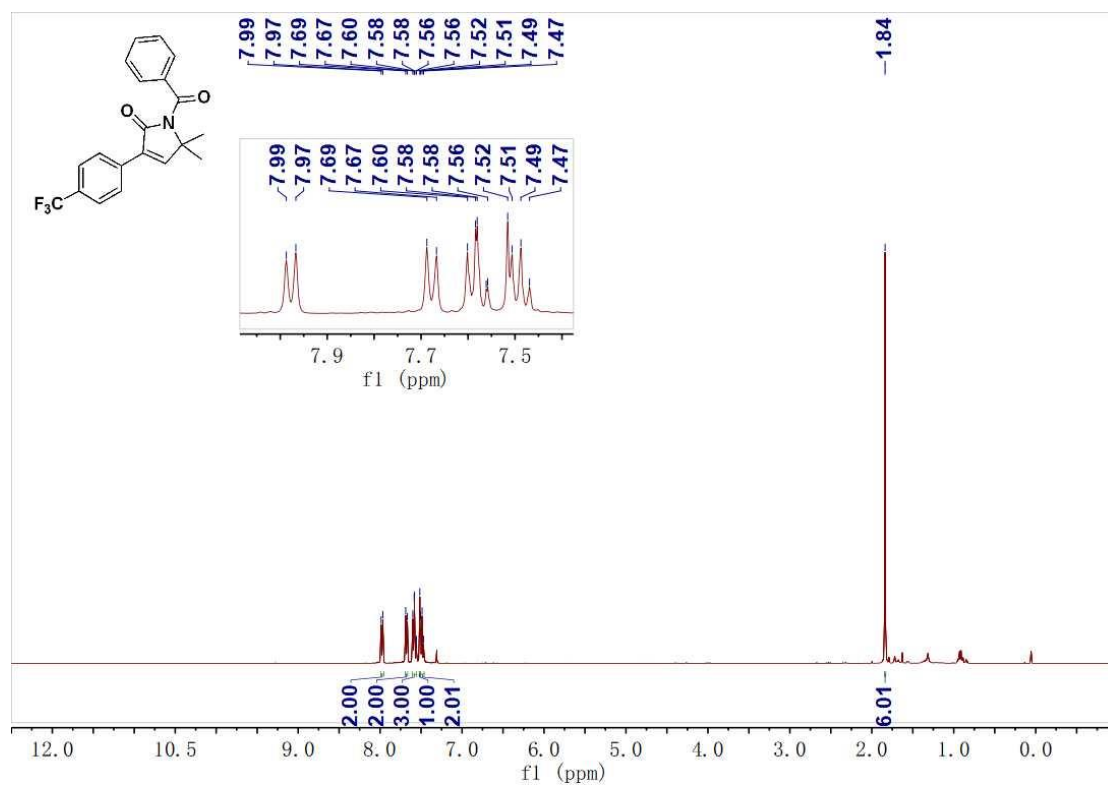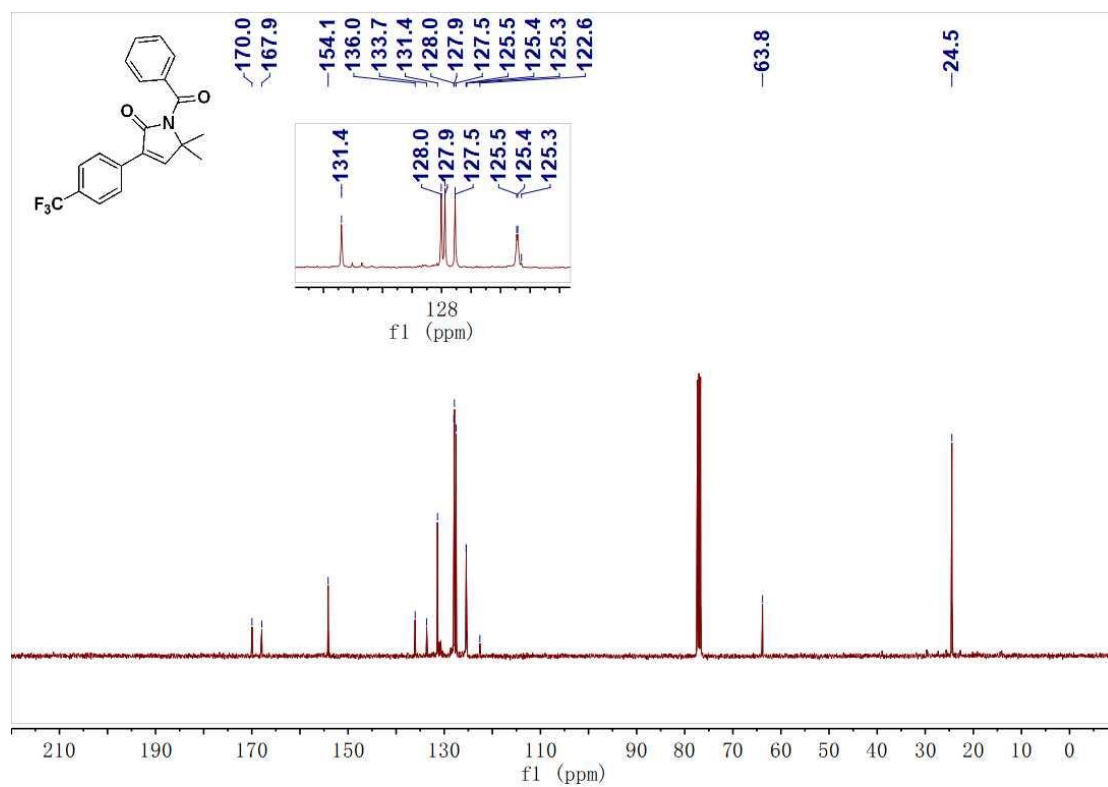

2aj

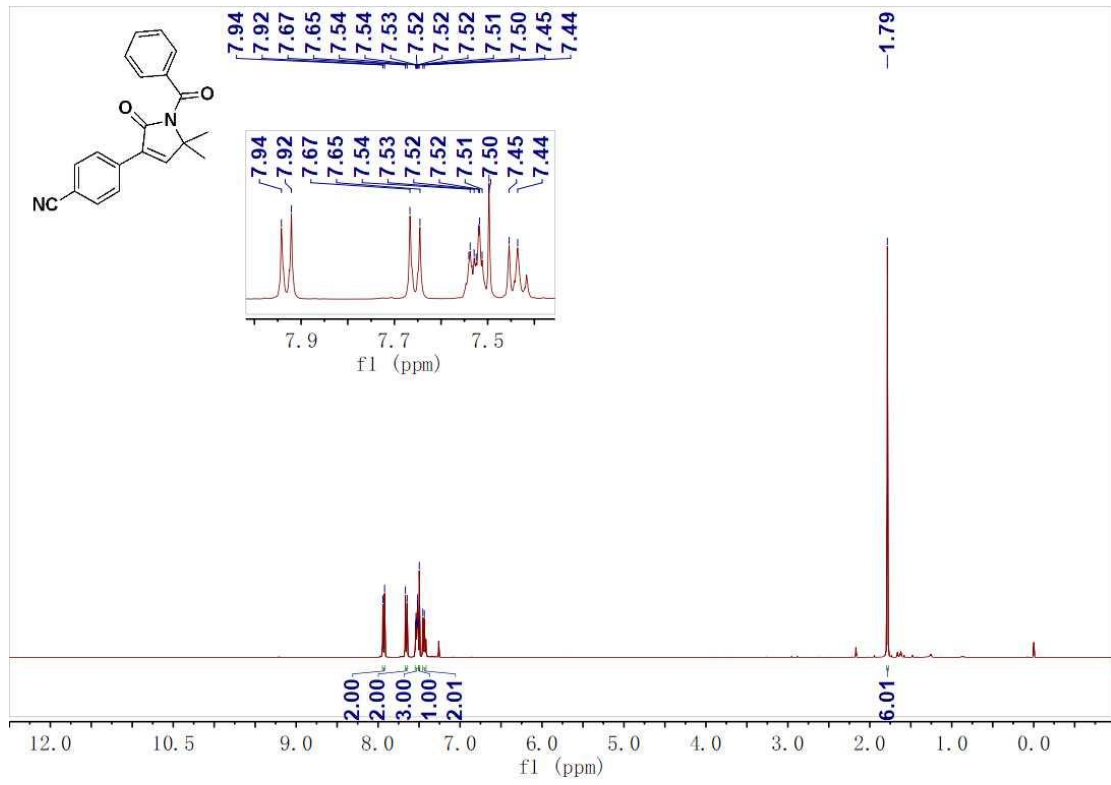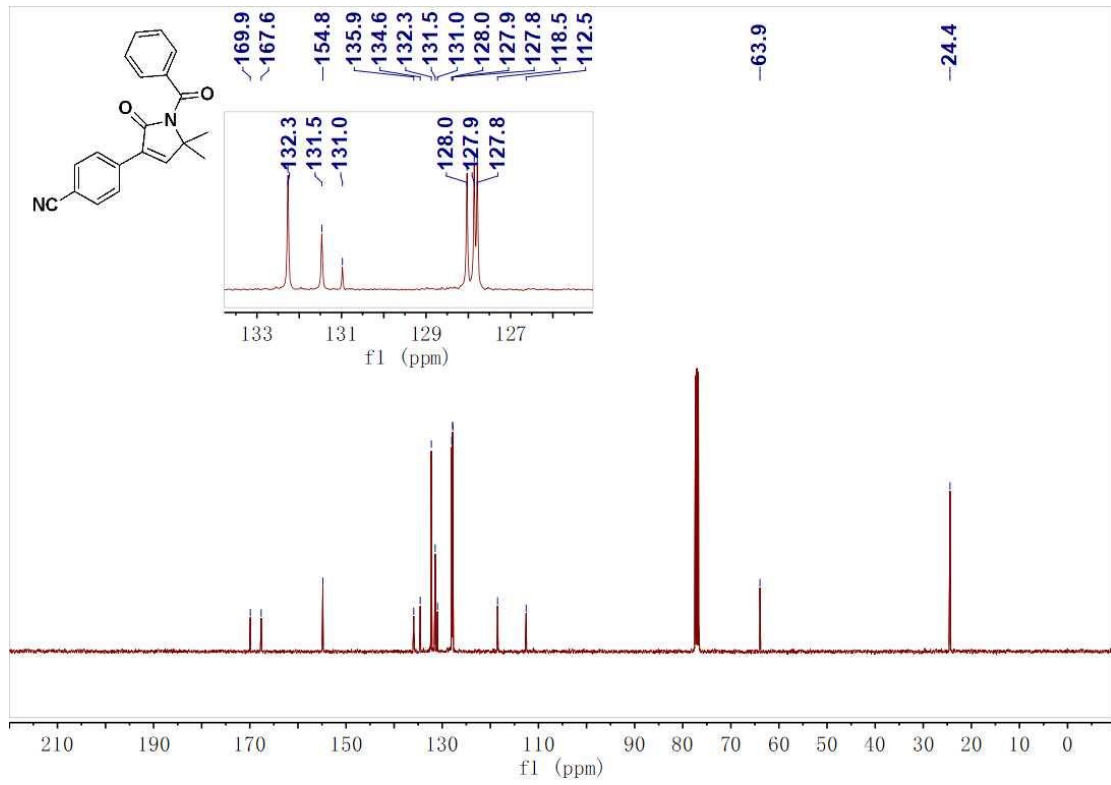

## 2ak

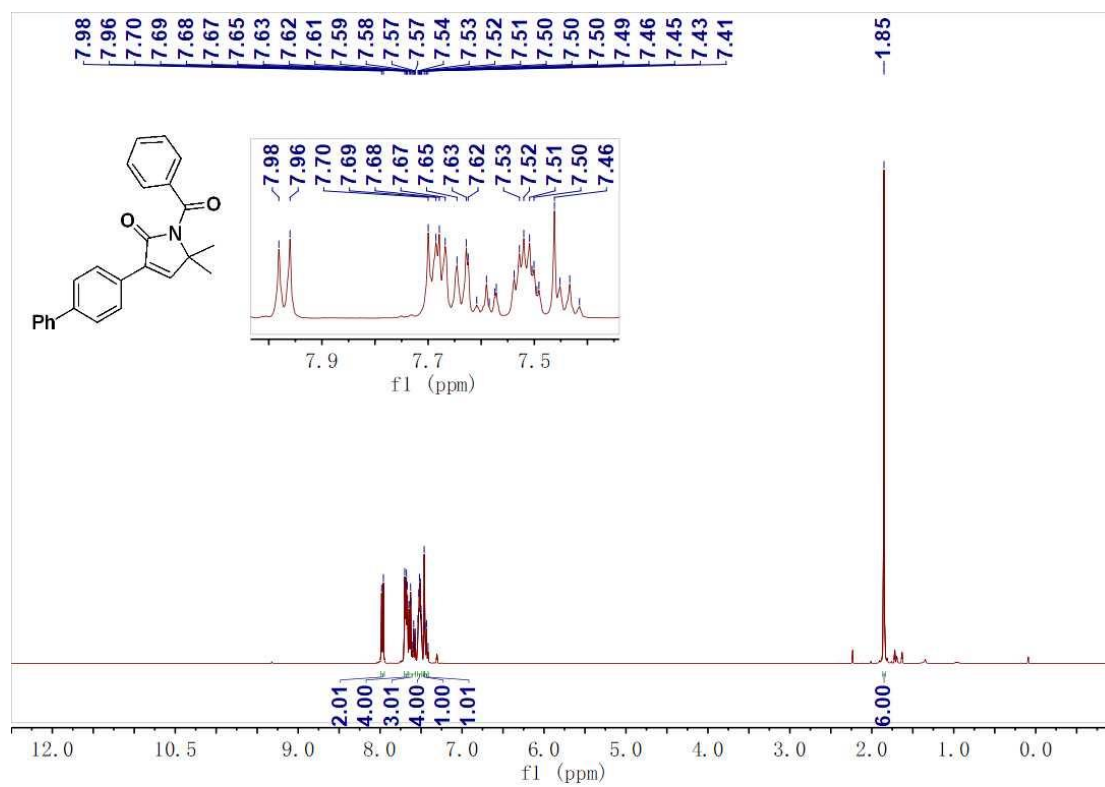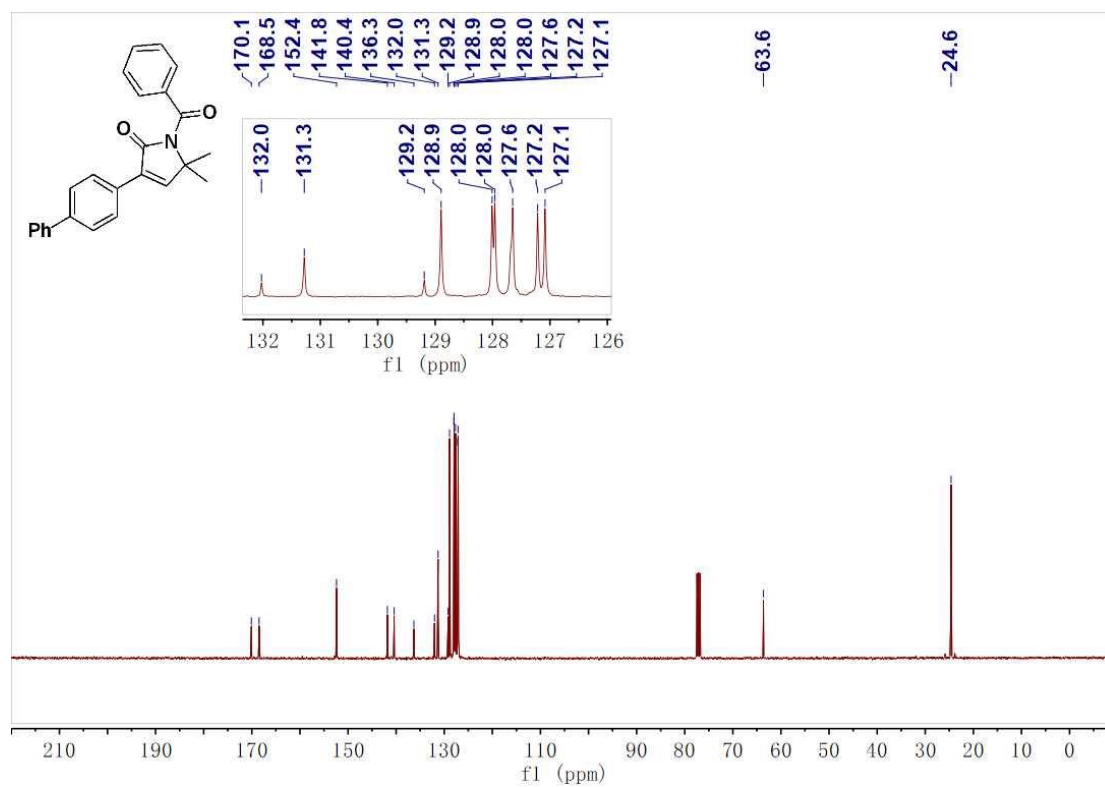

2al

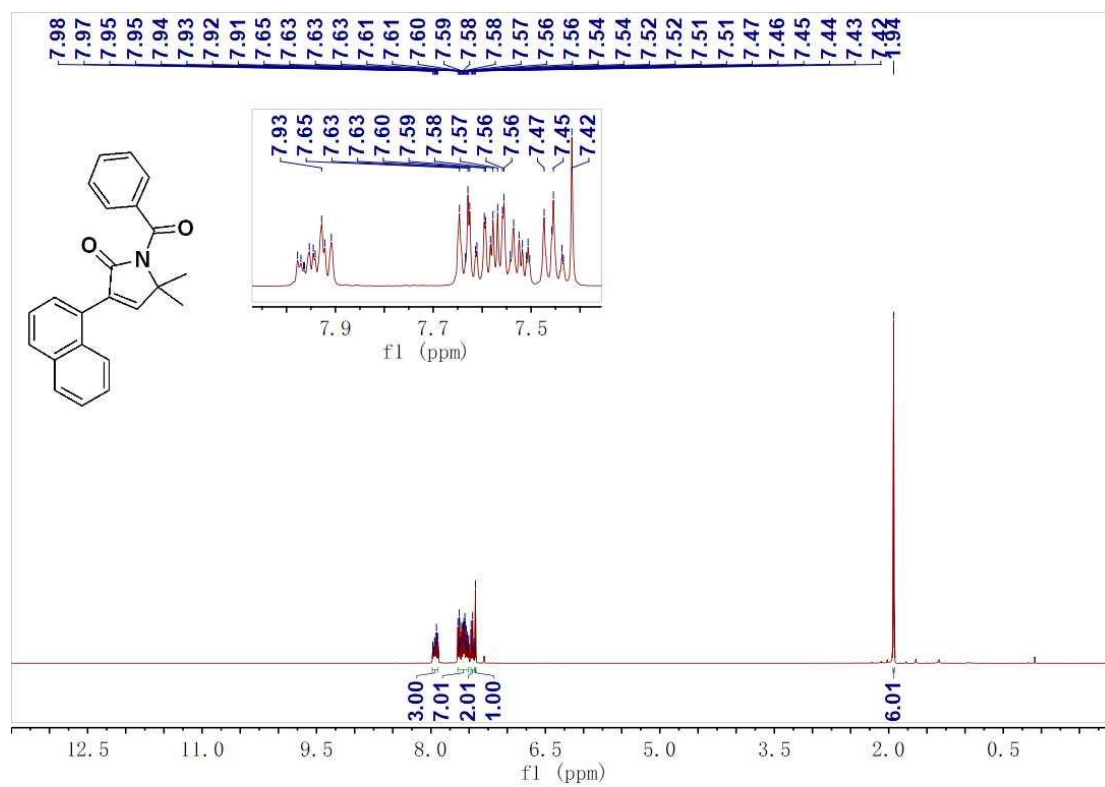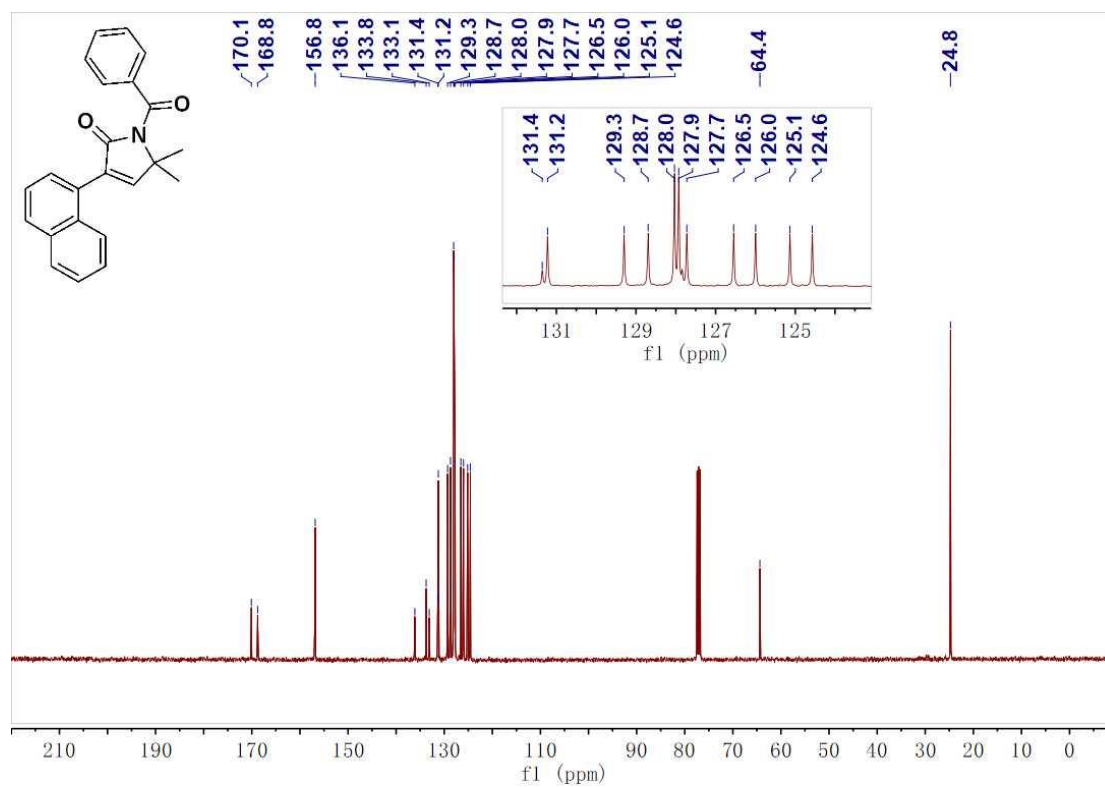

# 2am

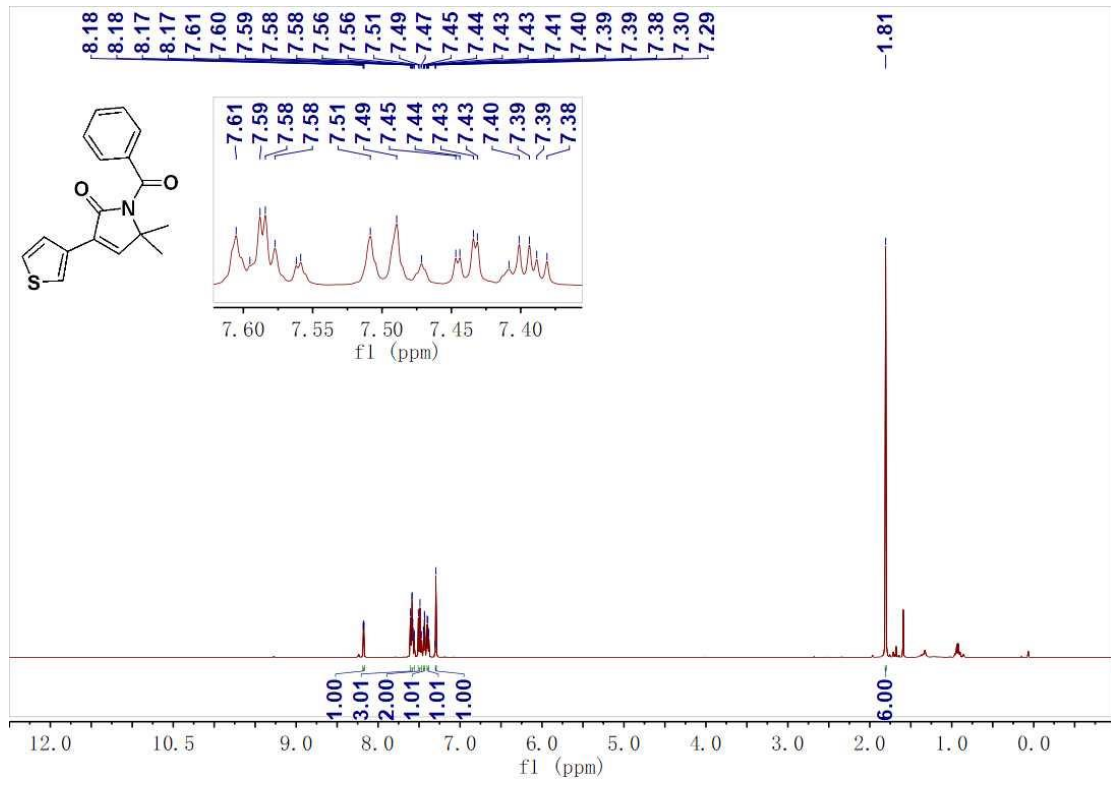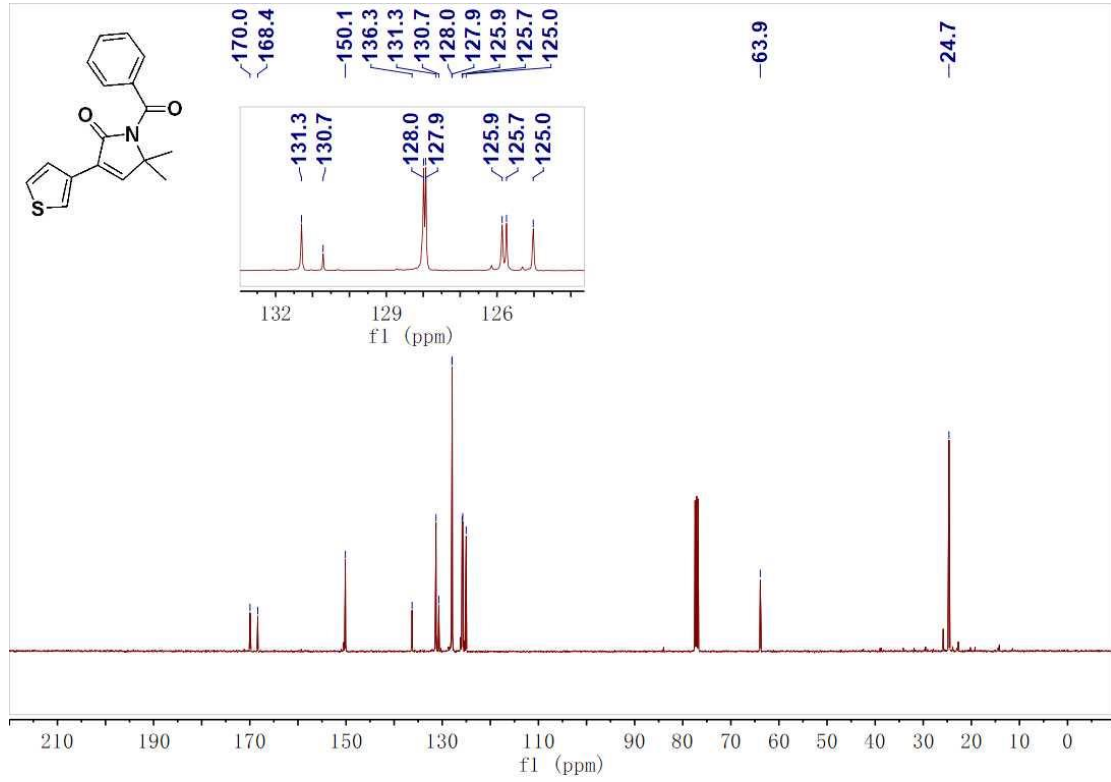

## 2ap

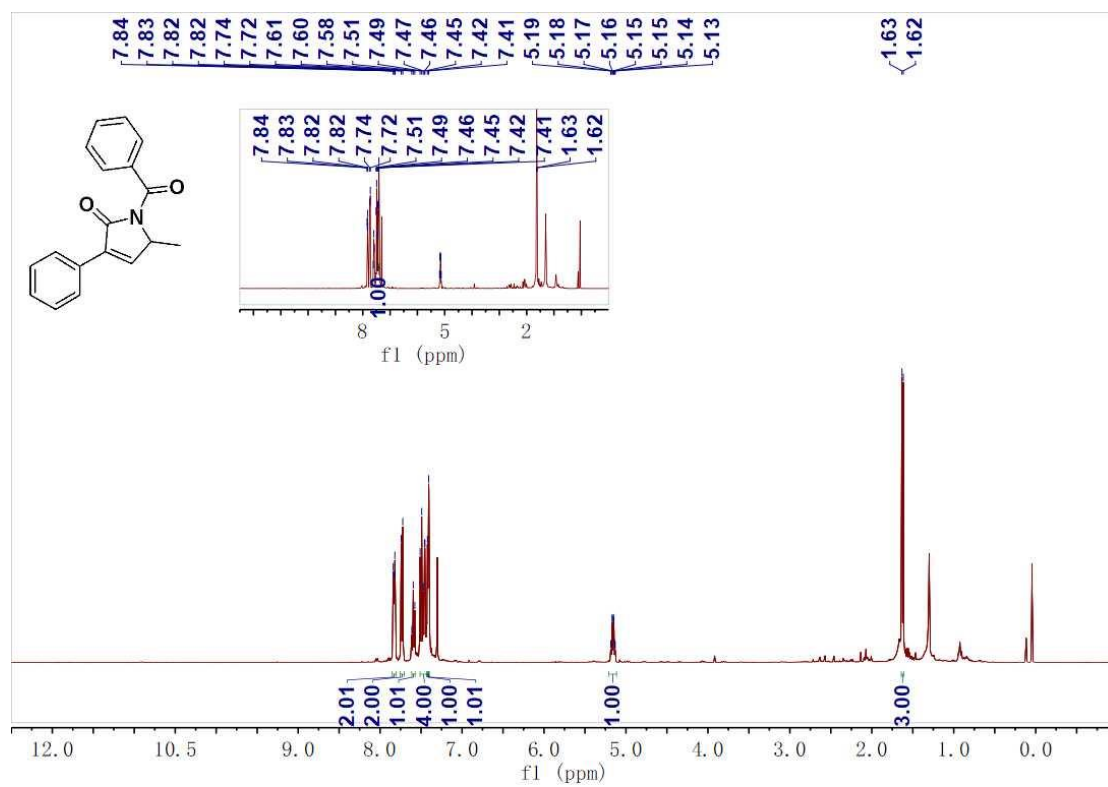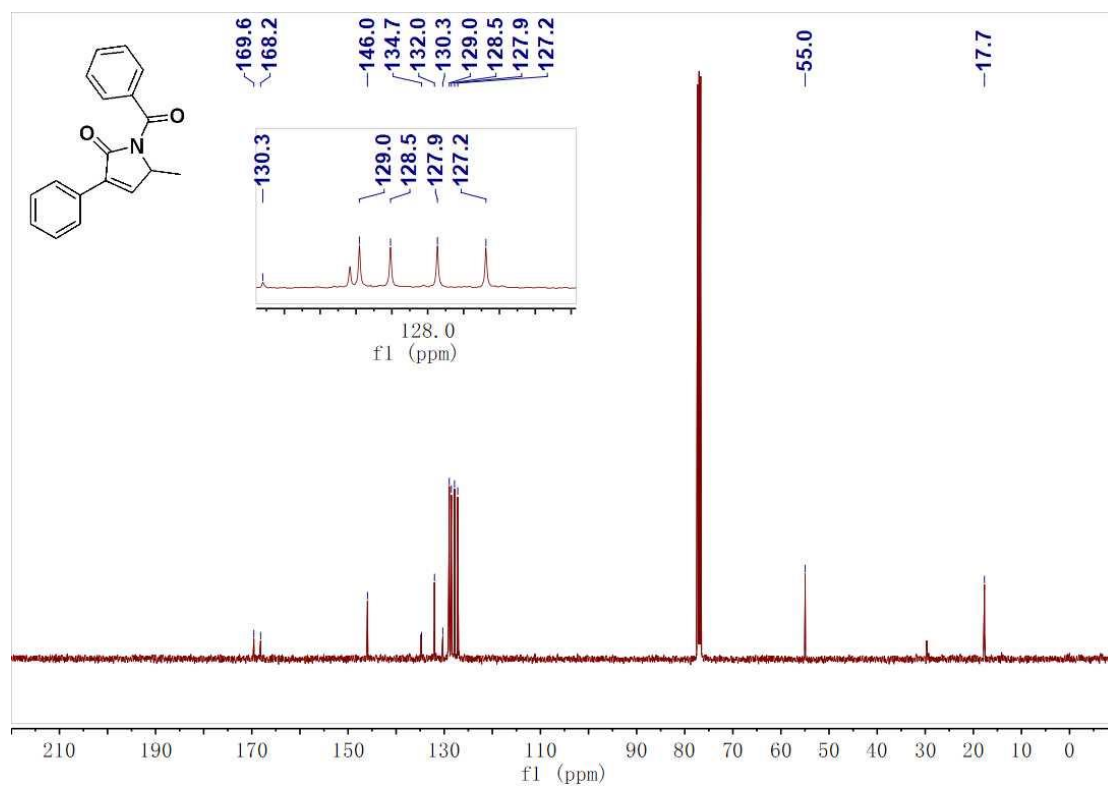

## 2aq

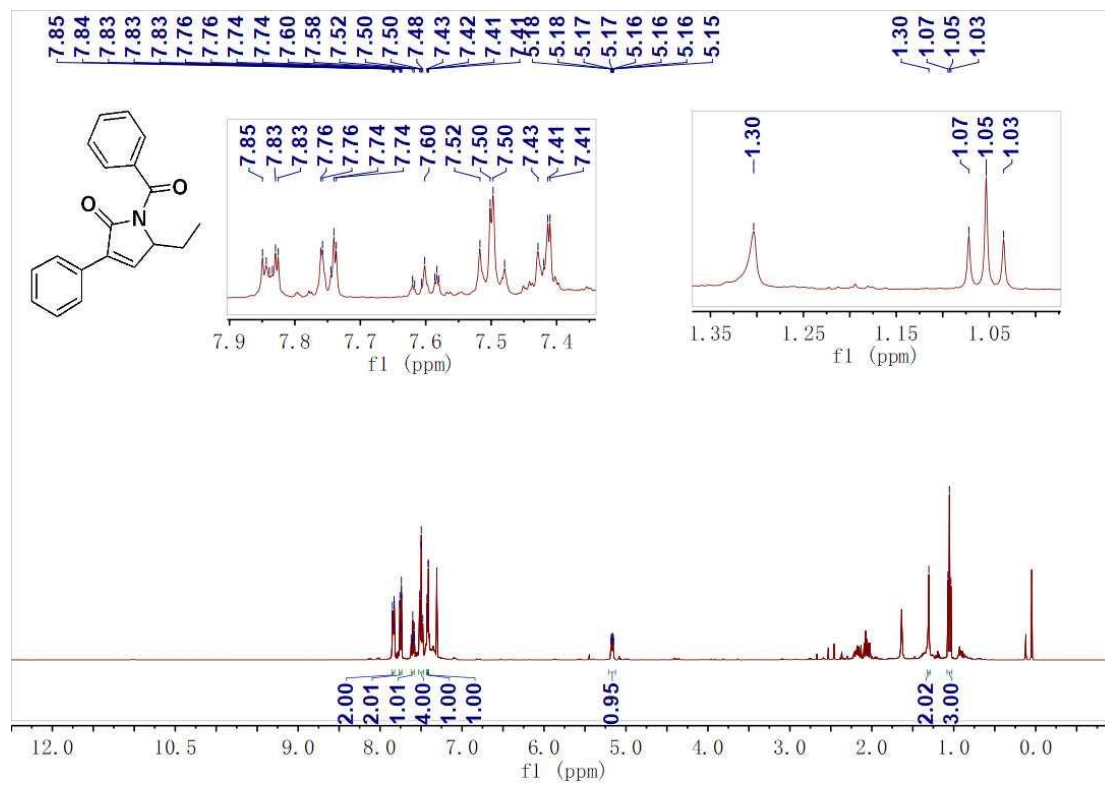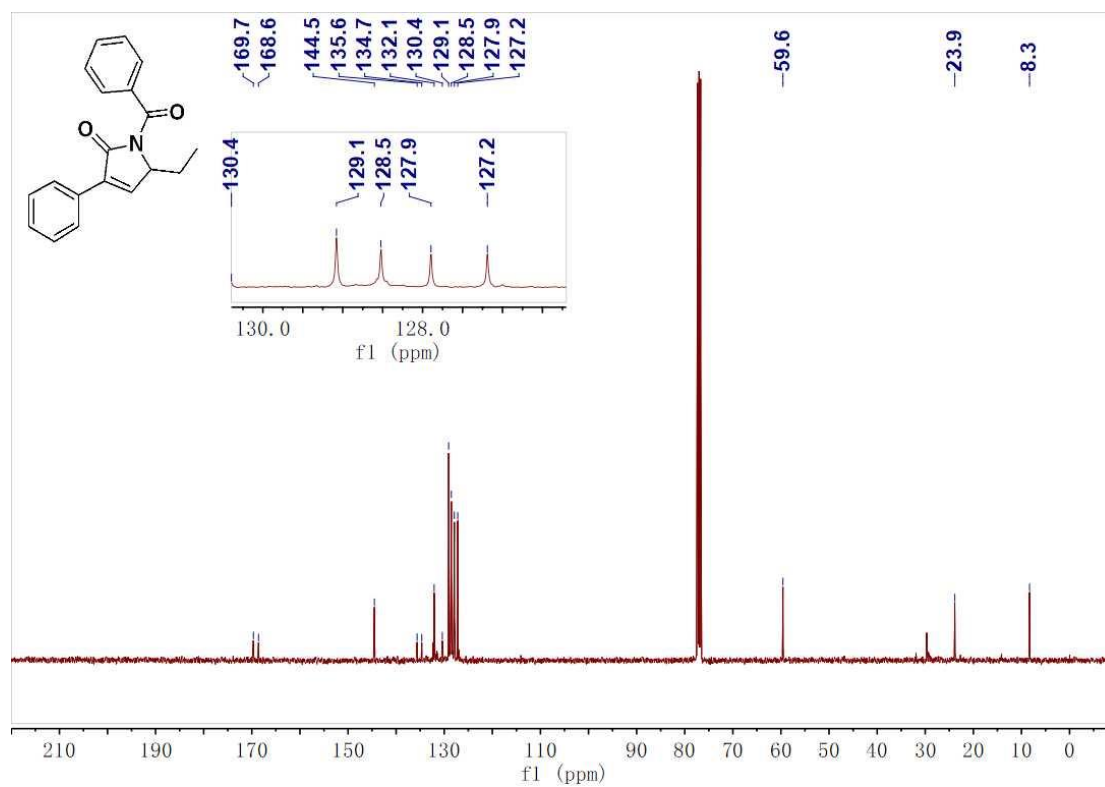



## 11. Spectra of Intermediate 2g'

2g'

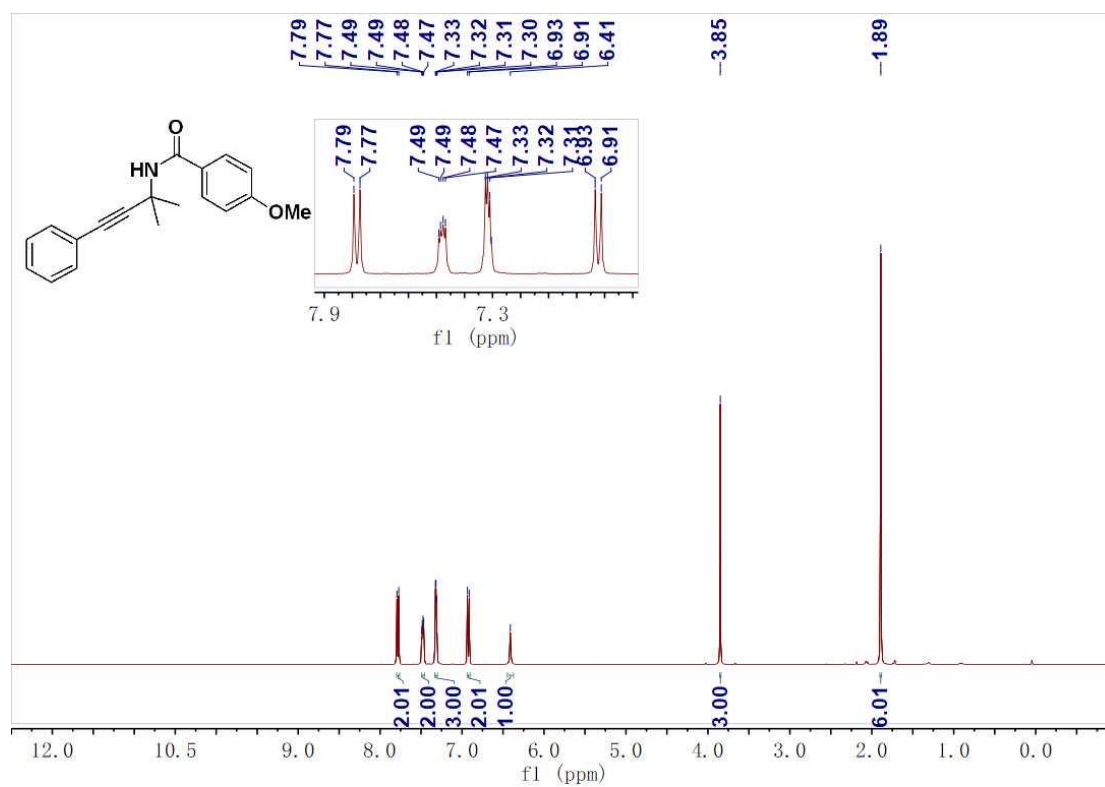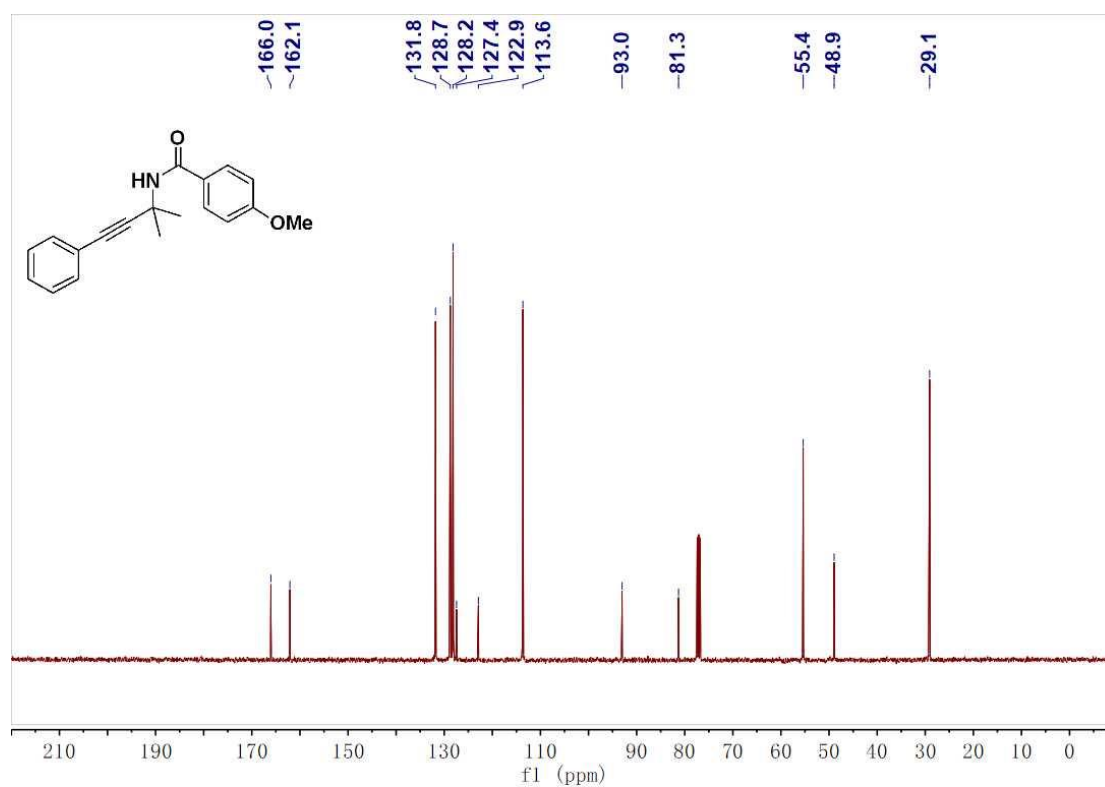

Supplement: d0qo00007h1.pdf [file d0qo00007h1.pdf]
